# Supplementary material for: Design, Synthesis and Antifungal/Nematicidal Activity of Novel 1,2,4-Oxadiazole Derivatives Containing Amide Fragments
Source: MDPI journal article supplement (doi:10.3390/ijms23031596), 2022-01-29
Supplement: s1 [file s1]

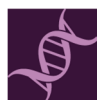

## Supplementary Materials

# Design, Synthesis and Antifungal/Nematicidal Activity of Novel 1,2,4-Oxadiazole Derivatives Containing Amide Fragments

Dan Liu <sup>1</sup>, Ling Luo <sup>1</sup>, Zhengxing Wang <sup>1</sup>, Xiaoyun Ma <sup>2</sup> and Xiuhai Gan <sup>1,\*</sup>

<sup>1</sup> State Key Laboratory Breeding Base of Green Pesticide and Agricultural Bioengineering, Key Laboratory of Green Pesticide and Agricultural Bioengineering, Ministry of Education, Research and Development Center for Fine Chemicals, Guizhou University, Huaxi District, Guiyang 550025, China; liudan19960516@163.com (D.L.); ll17792015@163.com (L.L.); wzx2669452150@163.com (Z.W.)

<sup>2</sup> School of Chemistry and Materials Science, Guizhou Education University, Wudang District, Guiyang 550018, China; maxiaoyun821215@163.com

\* Correspondence: gxh200719@163.com

### 1. The characterization data of the not known intermediated

The characterization data of the not known intermediated including <sup>1</sup>H NMR and <sup>13</sup>C NMR were shown as below.

**Data for** 3-Chloro-*N*-hydroxy-5-(trifluoromethyl)picolinimidamide (**a6**), m.p. 120–121 °C, yield 86.7%, <sup>1</sup>H NMR (400 MHz, DMSO-*d*<sub>6</sub>) δ 10.05 (s, 1H), 8.98 (d, *J* = 1.2 Hz, 1H), 8.53 (d, *J* = 1.2 Hz, 1H), 5.97 (s, 2H). <sup>13</sup>C NMR (101 MHz, DMSO-*d*<sub>6</sub>) δ 153.08, 149.43, 144.16 (d, *J* = 4.0 Hz), 136.51 (d, *J* = 3.5 Hz), 130.53, 126.27 (d, *J* = 33.1 Hz), 123.13 (d, *J* = 271.4 Hz).

**Data for** Ethyl 3-(3-chloro-5-(trifluoromethyl)pyridin-2-yl)-1,2,4-oxadiazole-5-carboxylate (**b6**), white solid, m.p. 43–44 °C, yield 75.8%, <sup>1</sup>H NMR (400 MHz, CDCl<sub>3</sub>) δ 8.97 (d, *J* = 1.2 Hz, 1H), 8.19 (d, *J* = 1.6 Hz, 1H), 4.59 (q, *J* = 7.2 Hz, 2H), 1.50 (t, *J* = 7.2 Hz, 3H). <sup>13</sup>C NMR (101 MHz, CDCl<sub>3</sub>) δ 166.99, 166.90, 153.65, 146.37, 144.71 (d, *J* = 4.0 Hz), 136.21 (d, *J* = 3.5 Hz), 132.64, 129.66–128.46 (m), 122.10 (q, *J* = 274.8 Hz), 64.21, 13.99.

**Data for** 3-(4-Thlorophenyl)-1,2,4-oxadiazole-5-carboxylic acid (**c3**), white solid, m.p. 85–86 °C, yield 56.7%, <sup>1</sup>H NMR (400 MHz, DMSO-*d*<sub>6</sub>) δ 9.77 (s, 1H), 8.06 (d, *J* = 8.4 Hz, 2H), 7.67 (d, *J* = 8.4 Hz, 2H). <sup>13</sup>C NMR (101 MHz, DMSO-*d*<sub>6</sub>) δ 168.16, 166.50, 136.87, 134.61, 129.97, 129.97, 129.40, 129.40, 125.22.

**Data for** 3-(Thiophen-2-yl)-1,2,4-oxadiazole-5-carboxylic acid (**c4**), m.p. 76–77 °C, yield 60.3%, <sup>1</sup>H NMR (400 MHz, DMSO-*d*<sub>6</sub>) δ 11.17 (s, 1H), 8.09 (d, *J* = 6.2 Hz, 1H), 7.99 (d, *J* = 3.8 Hz, 1H), 7.30 (dd, *J* = 5.0, 3.8 Hz, 1H). <sup>13</sup>C NMR (101 MHz, DMSO-*d*<sub>6</sub>) δ 150.43, 139.43, 135.49, 128.81, 124.67, 114.99, 108.73.

**Data for** 3-(6-Bromopyridin-3-yl)-1,2,4-oxadiazole-5-carboxylic acid (**c5**) m.p. 111–112 °C, yield 57.8%, <sup>1</sup>H NMR (400 MHz, DMSO-*d*<sub>6</sub>) δ 11.16 (s, 1H), 8.92–8.87 (m, 1H), 8.27 (dd, *J* = 8.3, 2.4 Hz, 1H), 7.98–7.90 (m, 1H). <sup>13</sup>C NMR (101 MHz, DMSO-*d*<sub>6</sub>) δ 153.94, 150.45, 146.29, 142.99, 129.19, 124.67, 116.78, 109.30.

**Data for** 3-(3-Chloro-5-(trifluoromethyl)pyridin-2-yl)-1,2,4-oxadiazole-5-carboxylic acid (**c6**) m.p. 60–61 °C, yield 50.9%, <sup>1</sup>H NMR (400 MHz, DMSO-*d*<sub>6</sub>) δ 10.57 (s, 1H), 9.16 (d, *J* = 0.8 Hz, 1H), 8.90 (d, *J* = 0.8 Hz, 1H). <sup>13</sup>C NMR (101 MHz, DMSO-*d*<sub>6</sub>) δ 150.42, 146.42 (d, *J* = 4.0 Hz), 136.74 (d, *J* = 3.7 Hz), 136.09, 129.45 (d, *J* = 19.8 Hz), 124.67, 123.88, 121.15, 114.95.

### 2. The characterization data of the target compound

The characterization data of the target compound including <sup>1</sup>H NMR, <sup>13</sup>C NMR and HRMS were shown as below.

**Data for** 3-Phenyl-*N*-(2-(pyridin-2-yl)ethyl)-1,2,4-oxadiazole-5-carboxamide (**F1**), white solid, m.p. 110–112 °C, yield 67.3%, purity 96.1%; <sup>1</sup>H NMR (400 MHz, CDCl<sub>3</sub>) δ 8.71 (s, 2H), 8.28 (s, 1H), 8.08 (d, *J* = 6.0 Hz, 2H), 7.78 (d, *J* = 36.0 Hz, 2H), 7.49 (d, *J* = 6.8 Hz, 3H), 4.10 (s, 2H), 3.67 (s, 2H). <sup>13</sup>C NMR (101 MHz, CDCl<sub>3</sub>) δ 168.88, 168.73, 157.49, 153.41, 146.56, 140.00, 131.84, 129.08, 129.08, 127.68, 127.68, 125.87, 125.14, 123.10, 39.08, 34.95. HRMS (ESI): calcd for C<sub>16</sub>H<sub>15</sub>N<sub>4</sub>O<sub>2</sub> ([M+H]<sup>+</sup>), 295.11895; found, 295.11966.

**Data for** *N*-(2-(3-chloro-5-(trifluoromethyl)pyridin-2-yl)ethyl)-3-phenyl-1,2,4-oxadiazole-5-carboxamide (**F2**), white solid, m.p. 81–82 °C, yield 52.6%, purity 99.0%; <sup>1</sup>H NMR (400 MHz, CDCl<sub>3</sub>) δ 8.79 (d, *J* = 0.8 Hz, 1H), 8.09 (dd, *J* = 7.6, 1.2 Hz, 3H), 7.94 (d, *J* = 1.2 Hz, 1H), 7.56–7.47 (m, 3H), 4.07 (dd, *J* = 12.0, 6.0 Hz, 2H), 3.35 (t, *J* = 5.6 Hz, 2H). <sup>13</sup>C NMR (101 MHz, CDCl<sub>3</sub>) δ 168.76, 168.66, 160.20,

153.05, 143.78 (d,  $J = 4.1$  Hz), 134.01 (d,  $J = 3.5$  Hz), 131.95, 131.81, 129.01, 129.01, 127.55, 127.55, 126.73, 125.74, 123.85 (dd,  $J = 239.37$ , 33.84 Hz), 36.78, 33.93. HRMS (ESI): calcd for  $C_{17}H_{13}ClF_3N_4O_2$  ( $[M+H]^+$ ), 396.06736; found, 396.06738.

**Data for** *N*-(2,4-difluorobenzyl)-3-phenyl-1,2,4-oxadiazole-5-carboxamide (**F3**), white solid, m.p. 92–93 °C, yield 52.9%, purity 98.7%;  $^1H$  NMR (400 MHz,  $CDCl_3$ )  $\delta$  8.07 (d,  $J = 6.8$  Hz, 2H), 7.60 (s, 1H), 7.53–7.42 (m, 4H), 6.87 (dd,  $J = 18.0$ , 8.8 Hz, 2H), 4.69 (d,  $J = 6.0$  Hz, 2H).  $^{13}C$  NMR (101 MHz,  $CDCl_3$ )  $\delta$  168.77, 168.38, 163.26 (dd,  $J = 174.9$ , 12.1 Hz), 160.78 (dd,  $J = 174.5$ , 12.1 Hz), 153.07, 131.87, 131.62 (dd,  $J = 9.9$ , 5.7 Hz), 129.03, 129.03, 127.55, 127.55, 125.65, 119.65 (dd,  $J = 15.2$ , 3.8 Hz), 111.73 (dd,  $J = 21.3$ , 3.8 Hz), 104.20, 37.50. HRMS (ESI): calcd for  $C_{16}H_{13}F_2N_3O_2$  ( $[M+H]^+$ ), 316.08921; found, 316.08899.

**Data for** *N*-(2,4-dichlorophenyl)-3-phenyl-1,2,4-oxadiazole-5-carboxamide (**F4**), white solid, m.p. 163–164 °C, yield 50.0%, purity 98.4%;  $^1H$  NMR (400 MHz,  $CDCl_3$ )  $\delta$  9.45 (s, 1H), 8.48 (d,  $J = 8.8$  Hz, 1H), 8.14 (d,  $J = 6.8$  Hz, 2H), 7.60–7.50 (m, 3H), 7.48 (d,  $J = 2.0$  Hz, 1H), 7.35 (dd,  $J = 8.8$ , 2.0 Hz, 1H).  $^{13}C$  NMR (101 MHz,  $CDCl_3$ )  $\delta$  168.88, 168.27, 150.43, 132.06, 131.88, 131.03, 129.21, 129.11, 129.11, 128.32, 127.65, 127.65, 125.44, 124.10, 122.25. HRMS (ESI): calcd for  $C_{15}H_9Cl_2N_3O_2Na$  ( $[M+Na]^+$ ), 355.99640; found, 355.99606.

**Data for** *N*-(2-(pyridin-2-yl)ethyl)-3-(p-tolyl)-1,2,4-oxadiazole-5-carboxamide (**F5**), yellow solid, m.p. 126–128 °C, yield 43.3%, purity 97.3%;  $^1H$  NMR (400 MHz,  $CDCl_3$ )  $\delta$  8.61 (d,  $J = 4.4$  Hz, 1H), 8.56 (s, 1H), 7.99 (d,  $J = 8.0$  Hz, 2H), 7.65 (td,  $J = 7.6$ , 1.6 Hz, 1H), 7.30 (d,  $J = 8.0$  Hz, 2H), 7.21 (dd,  $J = 7.6$ , 0.8 Hz, 2H), 3.94 (dd,  $J = 12.4$ , 6.0 Hz, 2H), 3.14 (t,  $J = 6.0$  Hz, 2H), 2.42 (s, 3H).  $^{13}C$  NMR (101 MHz,  $CDCl_3$ )  $\delta$  167.40, 157.57, 151.69, 147.89, 140.76, 135.49, 128.29, 128.29, 126.12, 126.12, 122.13, 122.13, 121.72, 120.52, 37.51, 34.59, 20.23. HRMS (ESI): calcd for  $C_{17}H_{17}N_4O_2$  ( $[M+H]^+$ ), 309.13460; found, 309.13394.

**Data for** *N*-(2-(3-chloro-5-(trifluoromethyl)pyridin-2-yl)ethyl)-3-(p-tolyl)-1,2,4-oxadiazole-5-carboxamide (**F6**), white solid, m.p. 96–98 °C, yield 58.1%, purity 98.9%;  $^1H$  NMR (400 MHz,  $CDCl_3$ )  $\delta$  8.79 (s, 1H), 8.05 (s, 1H), 7.97 (d,  $J = 8.2$  Hz, 2H), 7.93 (t,  $J = 5.6$  Hz, 1H), 7.30 (d,  $J = 8.0$  Hz, 2H), 4.06 (dd,  $J = 12.1$ , 6.1 Hz, 2H), 3.35 (t,  $J = 5.9$  Hz, 2H), 2.43 (s, 3H).  $^{13}C$  NMR (101 MHz,  $CDCl_3$ )  $\delta$  168.78, 168.53, 160.22, 153.13, 143.79 (d,  $J = 4.1$  Hz), 142.27, 134.01 (d,  $J = 3.5$  Hz), 131.95, 129.71, 127.49, 126.42, 126.08, 124.04, 122.96, 121.32, 36.80, 33.96, 21.62. HRMS (ESI): calcd for  $C_{18}H_{15}ClF_3N_4O_2$  ( $[M+H]^+$ ), 411.08301; found, 411.08237.

**Data for** *N*-(2,4-difluorobenzyl)-3-(p-tolyl)-1,2,4-oxadiazole-5-carboxamide (**F7**), white solid, m.p. 119–120 °C, yield 45.9%, purity 99.2%;  $^1H$  NMR (400 MHz,  $CDCl_3$ )  $\delta$  7.96 (d,  $J = 8.4$  Hz, 2H), 7.55 (s, 1H), 7.48–7.40 (m, 1H), 7.29 (d,  $J = 8.0$  Hz, 2H), 6.93–6.83 (m, 2H), 4.69 (d,  $J = 6.2$  Hz, 2H), 2.42 (s, 3H).  $^{13}C$  NMR (101 MHz,  $CDCl_3$ )  $\delta$  168.78, 168.20, 164.17, 162.39 (d,  $J = 12.2$  Hz), 161.69, 159.91 (d,  $J = 12.1$  Hz), 153.13, 142.39, 131.64 (dd,  $J = 9.7$ , 5.5 Hz), 129.75, 127.49, 122.80, 119.66 (d,  $J = 19.0$  Hz), 111.74 (dd,  $J = 21.6$ , 3.8 Hz), 104.21, 37.44, 21.65. HRMS (ESI): calcd for  $C_{17}H_{14}F_2N_3O_2$  ( $[M+H]^+$ ), 330.10486; found, 330.10410.

**Data for** *N*-(2,4-dichlorophenyl)-3-(p-tolyl)-1,2,4-oxadiazole-5-carboxamide (**F8**), white solid, m.p. 163–165 °C, yield 62.8%, purity 99.1%;  $^1H$  NMR (400 MHz,  $CDCl_3$ )  $\delta$  9.43 (s, 1H), 8.48 (d,  $J = 8.8$  Hz, 1H), 8.02 (d,  $J = 8.4$  Hz, 2H), 7.48 (d,  $J = 2.4$  Hz, 1H), 7.34 (dd,  $J = 10.0$ , 2.4 Hz, 3H), 2.44 (s, 3H).  $^{13}C$  NMR (101 MHz,  $CDCl_3$ )  $\delta$  168.89, 168.11, 150.50, 142.59, 131.91, 130.98, 129.80, 129.80, 129.20, 128.30, 127.58, 127.58, 124.09, 122.60, 122.25, 21.67. HRMS (ESI): calcd for  $C_{16}H_{11}Cl_2N_3O_2Na$  ( $[M+Na]^+$ ), 370.01205; found, 370.01202.

**Data for** 3-(4-chlorophenyl)-*N*-(2-(pyridin-2-yl)ethyl)-1,2,4-oxadiazole-5-carboxamide (**F9**), white solid, m.p. 129–131 °C, yield 55.5%, purity 98.4%;  $^1H$  NMR (400 MHz,  $CDCl_3$ )  $\delta$  8.67 (s, 1H, Py-H), 8.63–8.58 (m, 1H), 8.10–8.01 (m, 2H), 7.67 (td,  $J = 7.7$ , 1.8 Hz, 1H), 7.52–7.44 (m, 2H), 7.22 (dd,  $J = 7.6$ , 4.4 Hz, 2H), 3.99–3.89 (m, 2H), 3.19–3.11 (m, 2H).  $^{13}C$  NMR (101 MHz,  $CDCl_3$ )  $\delta$  169.06, 167.97, 158.92, 152.79, 149.18, 137.93, 136.96, 129.33, 129.33, 128.86, 128.86, 124.36, 123.55, 121.96, 38.88, 35.78. HRMS (ESI): calcd for  $C_{16}H_{14}ClN_4O_2$  ( $[M+H]^+$ ), 329.07998; found, 329.07922.

**Data for** *N*-(2-(3-chloro-5-(trifluoromethyl)pyridin-2-yl)ethyl)-3-(4-chlorophenyl)-1,2,4-oxadiazole-5-carboxamide (**F10**), white solid, m.p. 109–110 °C, yield 43.7%, purity 99.5%;  $^1H$  NMR (500 MHz,  $CDCl_3$ )  $\delta$  8.77 (s, 1H), 8.07 (s, 1H), 8.00 (d,  $J = 8.6$  Hz, 2H), 7.92 (d,  $J = 1.8$  Hz, 1H), 7.48–7.43 (m, 2H), 4.04 (dd,  $J = 9.6$  Hz,  $J = 8.8$  Hz, 2H), 3.33 (t,  $J = 4.8$  Hz, 2H).  $^{13}C$  NMR (126 MHz,  $CDCl_3$ )  $\delta$  168.88, 168.06, 160.26, 152.95, 143.84 (d,  $J = 3.0$  Hz), 138.13, 134.11 (d,  $J = 2.1$  Hz), 132.04, 129.46, 129.46, 128.93, 128.93, 126.33 (q,  $J = 54.3$  Hz), 124.29, 122.73 (d,  $J = 272.9$  Hz), 36.88, 33.98. HRMS (ESI): calcd for  $C_{17}H_{12}ClF_3N_4O_2$  ( $[M+H]^+$ ), 431.02839; found, 431.02731.

**Data for** 3-(4-chlorophenyl)-*N*-(2,4-difluorobenzyl)-1,2,4-oxadiazole-5-carboxamide (**F11**), white solid, m.p. 97–98 °C, yield 54.2%, purity 98.5%;  $^1H$  NMR (400 MHz,  $CDCl_3$ )  $\delta$  8.02 (d,  $J = 8.4$  Hz, 2H), 7.55 (s, 1H), 7.47 (d,  $J = 8.4$  Hz, 2H), 7.43 (dd,  $J = 8.8$ , 6.4 Hz, 1H), 6.92–6.83 (m, 2H), 4.69 (d,  $J = 6.0$  Hz, 2H).  $^{13}C$  NMR (101 MHz,  $CDCl_3$ )  $\delta$  168.51, 167.99, 163.22 (d,  $J = 176.2$  Hz), 160.80 (d,  $J = 185.5$  Hz), 152.89, 138.16, 131.65 (dd,  $J = 9.1$ , 5.2 Hz), 129.41, 129.41, 128.86, 128.86, 124.12, 119.59 (d,  $J = 15.2$  Hz), 111.75 (dd,  $J = 21.4$ , 3.7 Hz), 104.23, 37.56. HRMS (ESI): calcd for  $C_{16}H_{10}ClF_2N_3O_2Na$  ( $[M+Na]^+$ ), 372.03218; found, 372.03220.

**Data for** 3-(4-chlorophenyl)-*N*-(2,4-dichlorophenyl)-1,2,4-oxadiazole-5-carboxamide (**F12**), white solid, m.p. 169–171 °C, yield 57.3%, purity 98.5%;  $^1H$  NMR (400 MHz,  $CDCl_3$ )  $\delta$  9.41 (s, 1H), 8.48 (d,  $J = 9.2$  Hz, 1H), 8.09 (d,  $J = 8.4$  Hz, 2H), 7.51 (d,  $J = 8.8$  Hz, 2H), 7.49 (d,  $J = 2.4$  Hz, 1H), 7.35 (dd,  $J = 8.8$ , 2.0 Hz, 1H).  $^{13}C$  NMR (101 MHz,  $CDCl_3$ )  $\delta$  168.43, 168.12, 150.26, 138.38, 131.79, 131.14, 131.14, 129.50, 129.50, 129.23, 128.96, 128.96, 128.35, 124.00, 122.28. HRMS (ESI): calcd for  $C_{15}H_7Cl_3N_3O_2$  ( $[M-H]^-$ ), 365.96984; found, 365.96996.

**Data for** *N*-(2-(pyridin-2-yl)ethyl)-3-(thiophen-2-yl)-1,2,4-oxadiazole-5-carboxamide (**F13**), yellow solid, m.p. 133–135 °C, yield 57.2%, purity 98.7%;  $^1H$  NMR (500 MHz,  $CDCl_3$ )  $\delta$  8.62 (s, 1H), 8.58 (d,  $J = 4.5$  Hz, 1H), 7.82 (d,  $J = 4.5$  Hz, 1H), 7.64 (t,  $J = 17.5$  Hz, 1H), 7.53 (d,  $J = 6.0$  Hz, 1H), 7.19 (t,  $J = 2.5$  Hz, 2H), 7.15 (dd,  $J = 5.0$ , 4.0 Hz, 1H), 3.91 (dd,  $J = 12.5$ , 11.0 Hz, 2H), 3.14–3.09 (m, 2H).  $^{13}C$  NMR (126

MHz, CDCl<sub>3</sub>)  $\delta$  168.82, 164.91, 158.99, 152.82, 149.32, 137.01, 130.48, 130.16, 128.22, 127.33, 123.62, 122.03, 38.99, 35.90. HRMS (ESI): calcd for C<sub>14</sub>H<sub>13</sub>N<sub>4</sub>O<sub>2</sub>S ([M+H]<sup>+</sup>), 310.07537; found, 310.07428.

**Data for** *N*-(2-(3-chloro-5-(trifluoromethyl)pyridin-2-yl)ethyl)-3-(thiophen-2-yl)-1,2,4-oxadiazole-5-carboxamide (**F14**), yellow solid, m.p. 94–96 °C, yield 56.0%, purity 99.4%; <sup>1</sup>H NMR (500 MHz, CDCl<sub>3</sub>)  $\delta$  8.76 (s, 1H), 8.07 (s, 1H), 7.92 (s, 1H), 7.80 (d, *J* = 3.5 Hz, 1H), 7.53 (d, *J* = 6.0 Hz, 1H), 7.15 (dd, *J* = 5.0, 3.8 Hz, 1H), 4.03 (dd, *J* = 12.0, 6.2 Hz, 2H), 3.32 (t, *J* = 5.9 Hz, 2H). <sup>13</sup>C NMR (126 MHz, CDCl<sub>3</sub>)  $\delta$  168.55, 164.88, 160.24, 152.89, 143.84 (d, *J* = 3.9 Hz), 134.09 (d, *J* = 3.3 Hz), 132.01, 130.52, 130.26, 128.26, 127.14, 126.30 (d, *J* = 33.9 Hz), 122.74 (d, *J* = 272.9 Hz), 36.91, 33.96. HRMS (ESI): calcd for C<sub>15</sub>H<sub>11</sub>ClF<sub>3</sub>N<sub>4</sub>O<sub>2</sub>S ([M+H]<sup>+</sup>), 403.02379; found, 403.02222.

**Data for** *N*-(2,4-difluorobenzyl)-3-(thiophen-2-yl)-1,2,4-oxadiazole-5-carboxamide (**F15**), yellow solid, m.p. 102–103 °C, yield 63.7%, purity 98.8%; <sup>1</sup>H NMR (400 MHz, CDCl<sub>3</sub>)  $\delta$  7.82 (dd, *J* = 3.6, 0.8 Hz, 1H), 7.55 (dd, *J* = 4.8, 1.2 Hz, 2H), 7.47–7.39 (m, 1H), 7.17 (dd, *J* = 4.8, 3.6 Hz, 1H), 6.92–6.82 (m, 2H), 4.68 (d, *J* = 6.0 Hz, 2H). <sup>13</sup>C NMR (101 MHz, CDCl<sub>3</sub>)  $\delta$  168.17, 164.79, 163.26 (d, *J* = 164.9 Hz), 160.72 (d, *J* = 176.4 Hz), 152.83, 131.64 (dd, *J* = 9.8, 5.6 Hz), 130.46, 130.26, 128.22, 126.96, 119.56 (d, *J* = 15.2 Hz), 111.74 (d, *J* = 25.3 Hz), 104.22, 37.48. HRMS (ESI): calcd for C<sub>14</sub>H<sub>10</sub>F<sub>2</sub>N<sub>3</sub>O<sub>2</sub>S ([M+H]<sup>+</sup>), 322.04563; found, 322.04425.

**Data for** *N*-(2,4-dichlorophenyl)-3-(thiophen-2-yl)-1,2,4-oxadiazole-5-carboxamide (**F16**), white solid, m.p. 147–148 °C, yield 53.7%, purity 99.3%; <sup>1</sup>H NMR (400 MHz, CDCl<sub>3</sub>)  $\delta$  9.38 (s, 1H), 8.46 (d, *J* = 9.2 Hz, 1H), 7.90 (dd, *J* = 4.0, 1.2 Hz, 1H), 7.59 (dd, *J* = 5.2, 1.2 Hz, 1H), 7.49 (d, *J* = 2.4 Hz, 1H), 7.35 (dd, *J* = 8.8, 2.4 Hz, 1H), 7.20 (dd, *J* = 4.8, 3.6 Hz, 1H). <sup>13</sup>C NMR (101 MHz, CDCl<sub>3</sub>)  $\delta$  168.06, 164.97, 150.23, 131.80, 131.12, 130.85, 130.53, 129.23, 128.31, 128.24, 126.70, 124.19, 122.35. HRMS (ESI): calcd for C<sub>13</sub>H<sub>7</sub>Cl<sub>2</sub>N<sub>3</sub>O<sub>2</sub>SNa ([M+Na]<sup>+</sup>), 361.95282; found, 361.95276.

**Data for** 3-(6-bromopyridin-3-yl)-*N*-(2-(pyridin-2-yl)ethyl)-1,2,4-oxadiazole-5-carboxamide (**F17**), white solid, m.p. 135–137 °C, yield 53.0%, purity 93.8%; <sup>1</sup>H NMR (400 MHz, CDCl<sub>3</sub>)  $\delta$  9.15–9.12 (m, 1H), 8.80 (s, 1H), 8.60 (d, *J* = 4.4 Hz, 1H), 8.36 (dd, *J* = 8.4, 2.4 Hz, 1H), 7.67 (td, *J* = 7.6, 1.6 Hz, 1H), 7.50 (dd, *J* = 8.4, 0.4 Hz, 1H), 7.25–7.19 (m, 2H), 3.99–3.91 (m, 2H), 3.19–3.11 (m, 2H). <sup>13</sup>C NMR (101 MHz, CDCl<sub>3</sub>)  $\delta$  169.56, 166.09, 158.97, 154.58, 152.46, 149.20, 148.79, 137.29, 137.00, 124.75, 123.57, 122.01, 121.26, 38.94, 35.68. HRMS (ESI): calcd for C<sub>15</sub>H<sub>12</sub>BrN<sub>5</sub>O<sub>2</sub> ([M-H]<sup>−</sup>), 407.98574; found, 407.98596.

**Data for** 3-(6-bromopyridin-3-yl)-*N*-(2-(3-chloro-5-(trifluoromethyl)pyridin-2-yl)ethyl)-1,2,4-oxadiazole-5-carboxamide (**F18**), white solid, m.p. 118–120 °C, yield 43.8%, purity 99.6%; <sup>1</sup>H NMR (400 MHz, CDCl<sub>3</sub>)  $\delta$  9.10 (d, *J* = 2.4 Hz, 1H), 8.78 (s, 1H), 8.34 (dd, *J* = 8.2, 2.4 Hz, 1H), 8.13 (s, 1H), 7.95 (d, *J* = 1.6 Hz, 1H), 7.50 (d, *J* = 8.2 Hz, 1H), 4.07 (dd, *J* = 12.0, 6.0 Hz, 2H), 3.36 (t, *J* = 6.0 Hz, 2H). <sup>13</sup>C NMR (101 MHz, CDCl<sub>3</sub>)  $\delta$  169.25, 166.11, 160.14, 154.69, 152.54, 148.75, 143.76 (d, *J* = 3.9 Hz), 137.27, 134.05, 131.97, 126.51, 126.18, 124.78, 121.11, 36.92, 33.84. HRMS (ESI): calcd for C<sub>16</sub>H<sub>10</sub>BrClF<sub>3</sub>N<sub>5</sub>O<sub>2</sub> ([M-H]<sup>−</sup>), 509.93415; found, 509.93390.

**Data for** 3-(6-bromopyridin-3-yl)-*N*-(2,4-difluorobenzyl)-1,2,4-oxadiazole-5-carboxamide (**F19**), white solid, m.p. 128–129 °C, yield 53.1%, purity 98.5%; <sup>1</sup>H NMR (400 MHz, CDCl<sub>3</sub>)  $\delta$  9.08 (d, *J* = 2.0 Hz, 1H), 8.34 (dd, *J* = 8.2, 2.4 Hz, 1H), 7.60 (s, 1H), 7.49 (d, *J* = 8.0 Hz, 1H), 7.48–7.40 (m, 1H), 7.01–6.78 (m, 2H), 4.71 (d, *J* = 6.0 Hz, 2H). <sup>13</sup>C NMR (101 MHz, CDCl<sub>3</sub>)  $\delta$  168.94, 166.11, 163.30 (dd, *J* = 178.1, 11.9 Hz), 160.81 (dd, *J* = 177.8, 12.2 Hz), 154.76, 152.59, 148.71, 137.28, 131.68 (dd, *J* = 9.8, 6.4 Hz), 124.82, 121.01, 119.47 (dd, *J* = 14.9, 3.7 Hz), 111.77 (dd, *J* = 21.5, 3.9 Hz), 104.26, 37.62. HRMS (ESI): calcd for C<sub>15</sub>H<sub>9</sub>BrF<sub>2</sub>N<sub>4</sub>O<sub>2</sub> ([M-H]<sup>−</sup>), 428.95600; found, 428.95587.

**Data for** 3-(6-bromopyridin-3-yl)-*N*-(2,4-dichlorophenyl)-1,2,4-oxadiazole-5-carboxamide (**F20**), white solid, m.p. 201–202 °C, yield 53.8%, purity 99.0%; <sup>1</sup>H NMR (400 MHz, DMSO-*d*<sub>6</sub>)  $\delta$  11.18 (s, 1H), 9.10 (d, *J* = 2.2 Hz, 1H), 8.50 (dd, *J* = 8.4, 2.4 Hz, 1H), 7.82 (d, *J* = 6.1 Hz, 1H), 7.81 (s, 1H), 7.70 (d, *J* = 8.6 Hz, 1H), 7.55 (dd, *J* = 8.6, 2.4 Hz, 1H). <sup>13</sup>C NMR (101 MHz, DMSO-*d*<sub>6</sub>)  $\delta$  169.65, 166.28, 153.88, 152.01, 148.84, 138.74, 132.73, 132.53, 130.78, 129.86, 129.51, 128.52, 125.80, 121.82. HRMS (ESI): calcd for C<sub>14</sub>H<sub>6</sub>BrCl<sub>2</sub>N<sub>4</sub>O<sub>2</sub> ([M-H]<sup>−</sup>), 410.90457; found, 410.90454.

**Data for** 3-(3-chloro-5-(trifluoromethyl)pyridin-2-yl)-*N*-(2-(pyridin-2-yl)ethyl)-1,2,4-oxadiazole-5-carboxamide (**F21**), yellow solid, m.p. 140–141 °C, yield 56.5%, purity 92.4%; <sup>1</sup>H NMR (400 MHz, CDCl<sub>3</sub>)  $\delta$  8.96 (d, *J* = 1.22 Hz, 1H), 8.56 (dd, *J* = 4.8, 0.8 Hz, 1H), 8.87 (s, 1H), 8.18 (d, *J* = 2.4 Hz, 1H), 7.46 (td, *J* = 8.0, 2.0 Hz, 1H), 7.21–7.17 (m, 1H), 3.96 (dd, *J* = 12.4, 7.0 Hz, 2H), 3.14 (t, *J* = 6.4 Hz, 2H). <sup>13</sup>C NMR (101 MHz, CDCl<sub>3</sub>)  $\delta$  169.37, 166.17, 158.73, 152.42, 149.33, 146.60, 144.64 (d, *J* = 3.8 Hz), 136.81, 136.32 (d, *J* = 3.5 Hz), 132.70, 129.01 (d, *J* = 34.2 Hz), 123.47, 121.88, 120.75, 39.00, 35.99. HRMS (ESI): calcd for C<sub>16</sub>H<sub>12</sub>ClF<sub>3</sub>N<sub>5</sub>O<sub>2</sub> ([M+H]<sup>+</sup>), 398.06261; found, 398.06070.

**Data for** 3-(3-chloro-5-(trifluoromethyl)pyridin-2-yl)-*N*-(2-(3-chloro-5-(trifluoromethyl)pyridin-2-yl)ethyl)-1,2,4-oxadiazole-5-carboxamide (**F22**), white solid, m.p. 158–159 °C, yield 49.9%, purity 99.4%; <sup>1</sup>H NMR (400 MHz, CDCl<sub>3</sub>)  $\delta$  8.96 (d, *J* = 0.8 Hz, 1H), 8.74 (s, 1H), 8.19 (d, *J* = 1.2 Hz, 1H), 8.08 (s, 1H), 7.93 (d, *J* = 1.6 Hz, 1H), 4.07 (m, 2H), 3.35 (m, 2H). <sup>13</sup>C NMR (101 MHz, CDCl<sub>3</sub>)  $\delta$  169.13, 166.09, 159.98, 152.48, 146.44, 144.66 (d, *J* = 3.8 Hz), 143.82 (d, *J* = 4.0 Hz), 136.39 (d, *J* = 3.5 Hz), 133.97 (d, *J* = 3.6 Hz), 132.75, 131.91, 129.09 (d, *J* = 34.3 Hz), 126.23 (d, *J* = 33.7 Hz), 123.72 (d, *J* = 57.3 Hz), 121.00 (d, *J* = 57.8 Hz), 36.90, 33.89. HRMS (ESI): calcd for C<sub>17</sub>H<sub>10</sub>Cl<sub>2</sub>F<sub>6</sub>N<sub>5</sub>O<sub>2</sub> ([M+H]<sup>+</sup>), 500.01103; found, 500.00858.

**Data for** 3-(3-chloro-5-(trifluoromethyl)pyridin-2-yl)-*N*-(2,4-difluorobenzyl)-1,2,4-oxadiazole-5-carboxamide (**F23**), white solid, m.p. 112–114 °C, yield 47.7%, purity 98.6%; <sup>1</sup>H NMR (400 MHz, CDCl<sub>3</sub>)  $\delta$  8.95 (s, 1H), 8.19 (s, 1H), 7.64 (s, 1H), 7.46–7.37 (m, 1H), 6.92–6.81 (m, 2H), 4.68 (d, *J* = 6.0 Hz, 2H). <sup>13</sup>C NMR (101 MHz, CDCl<sub>3</sub>)  $\delta$  168.82, 166.08, 164.13, 161.64, 152.41,

146.19, 144.67 (d,  $J = 3.8$  Hz), 136.53 (d,  $J = 3.6$  Hz), 132.82, 131.79 (dd,  $J = 9.9, 5.5$  Hz), 129.12 (d,  $J = 34.3$  Hz), 122.04 (d,  $J = 274.6$  Hz), 119.27, 111.73 (dd,  $J = 21.4, 3.6$  Hz), 104.22, 37.57. HRMS (ESI): calcd for  $C_{16}H_9ClF_5N_4O_2$  ( $[M+H]^+$ ), 419.03287; found, 419.03104.

**Data for** 3-(3-chloro-5-(trifluoromethyl)pyridin-2-yl)-*N*-(2,4-dichlorophenyl)-1,2,4-oxadiazole-5-carboxamide (**F24**), white solid, m.p. 137–138 °C, yield 55.0%, purity 92.3%;  $^1H$  NMR (400 MHz,  $CDCl_3$ )  $\delta$  9.41 (s, 1H), 8.99 (d,  $J = 0.8$  Hz, 1H), 8.44 (d,  $J = 8.8$  Hz, 1H), 8.21 (d,  $J = 1.2$  Hz, 1H), 7.49 (d,  $J = 2.0$  Hz, 1H), 7.37 (dd,  $J = 8.8, 2.0$  Hz, 1H).  $^{13}C$  NMR (101 MHz,  $CDCl_3$ )  $\delta$  168.72, 166.30, 149.94, 146.29, 144.76 (d,  $J = 3.7$  Hz), 136.32 (d,  $J = 3.5$  Hz), 132.84, 131.59, 131.41, 129.31, 128.31, 124.47, 123.45, 122.62, 120.73. HRMS (ESI): calcd for  $C_{15}H_6Cl_3F_3N_4O_2Na$  ( $[M+Na]^+$ ), 458.94006; found, 458.93991.

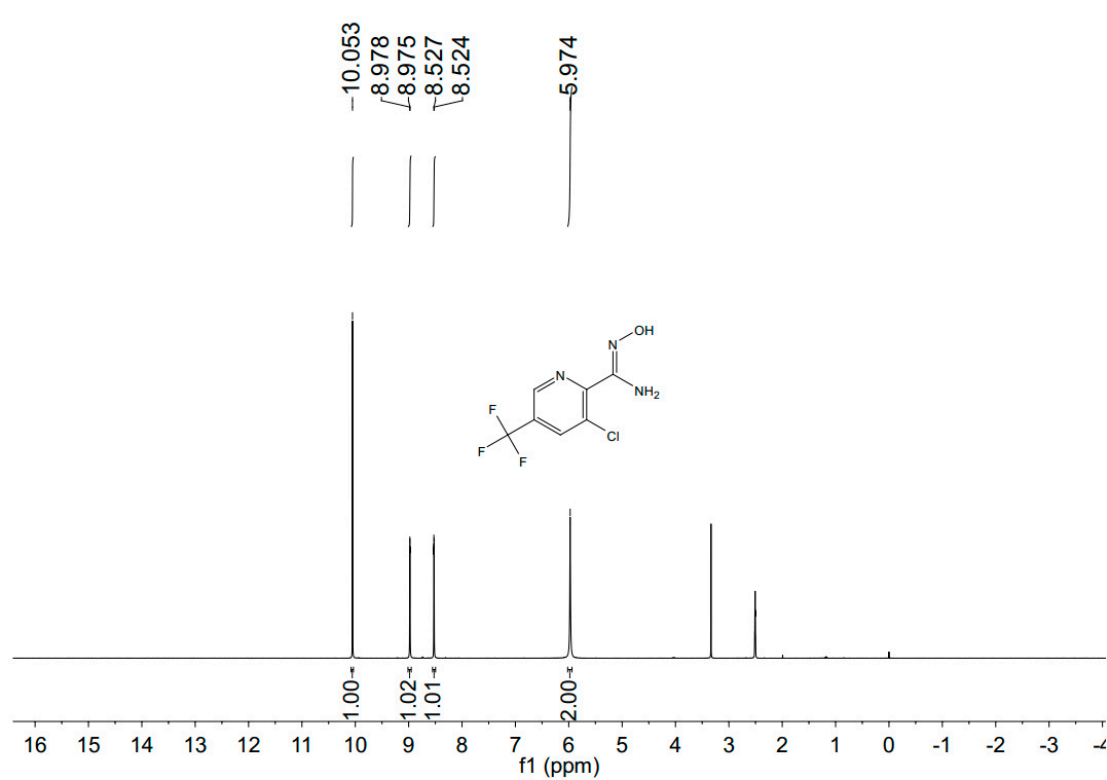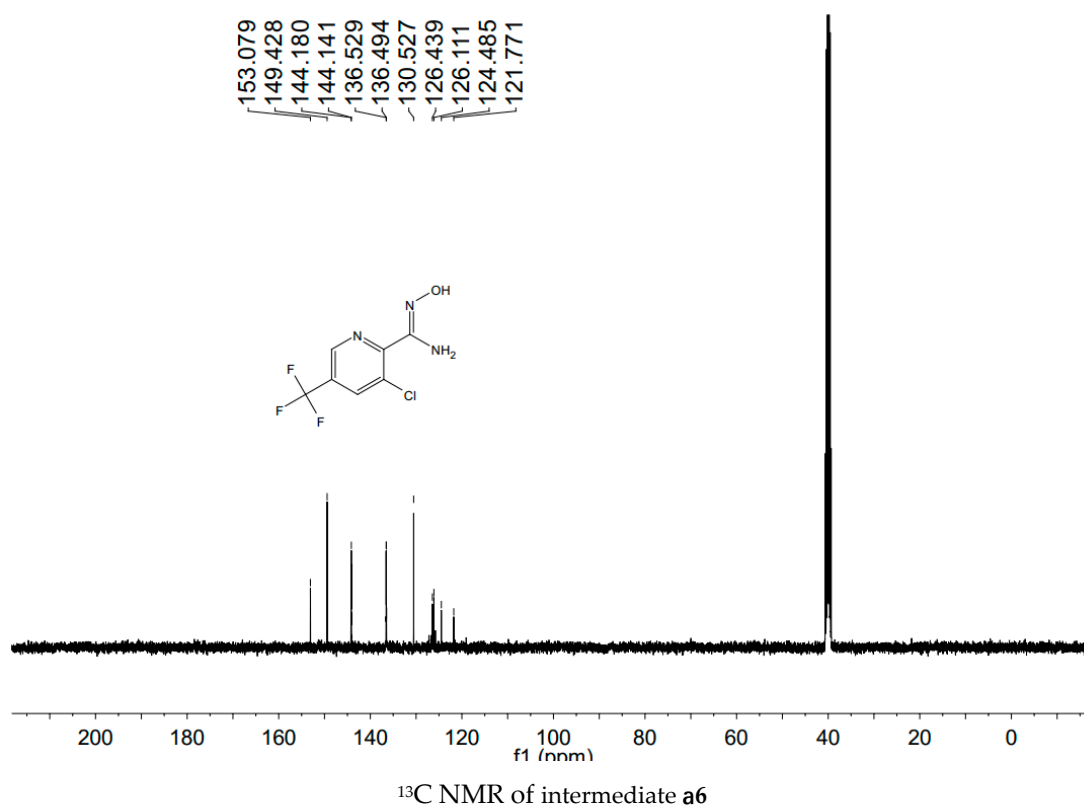

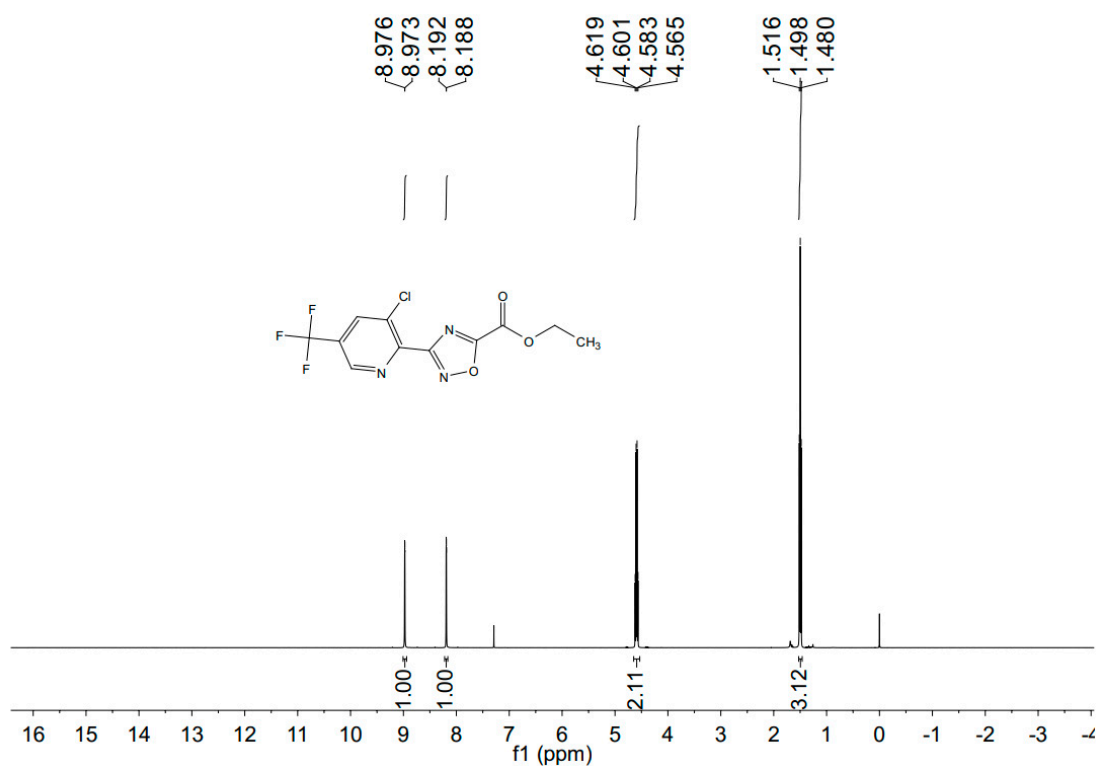<sup>1</sup>H NMR of intermediate **b6**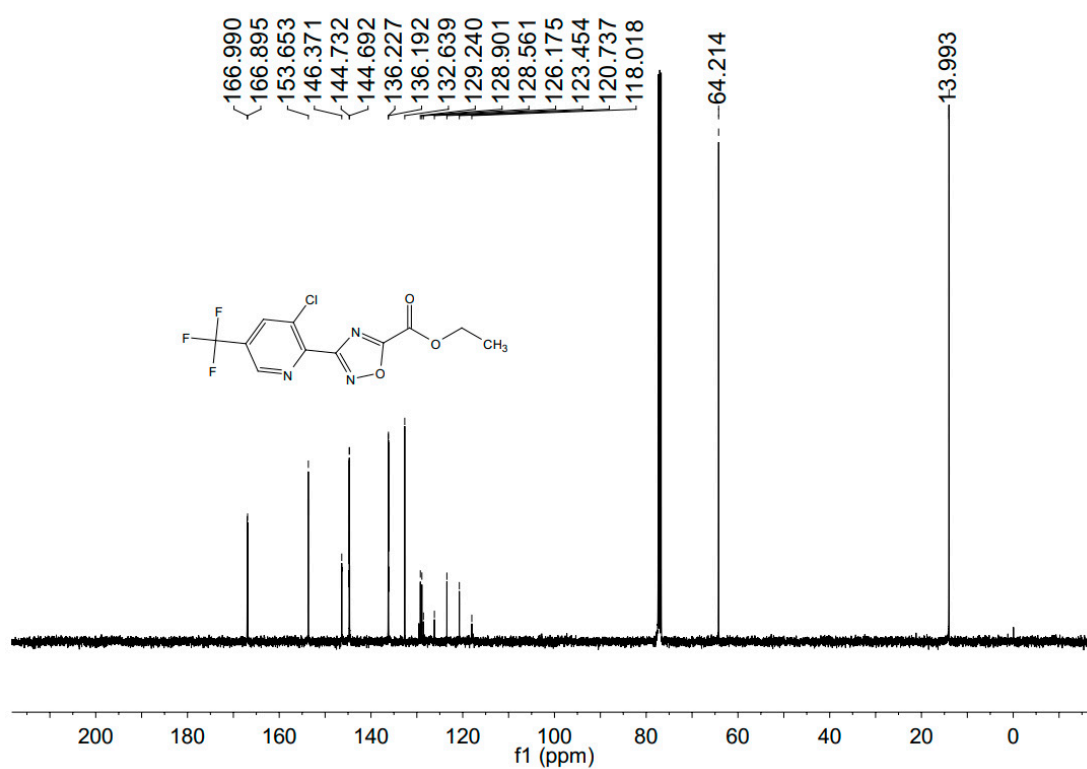<sup>13</sup>C NMR of intermediate **b6**

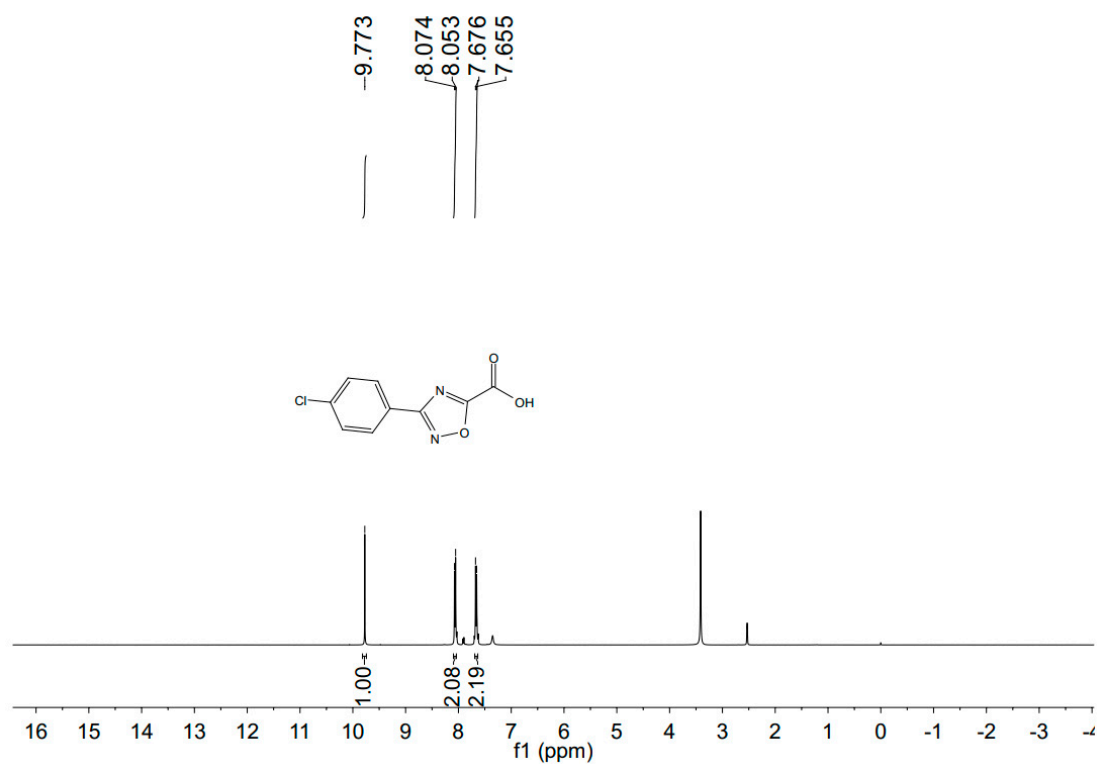<sup>1</sup>H NMR of intermediate **c3**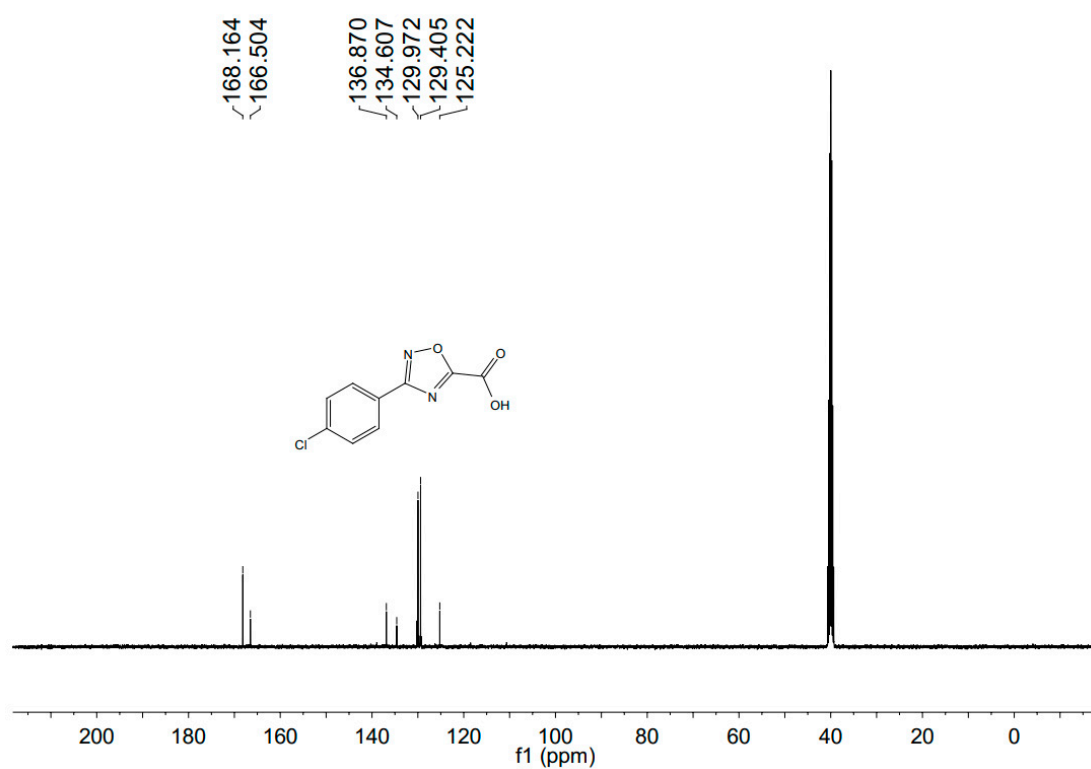<sup>13</sup>C NMR of intermediate **c3**

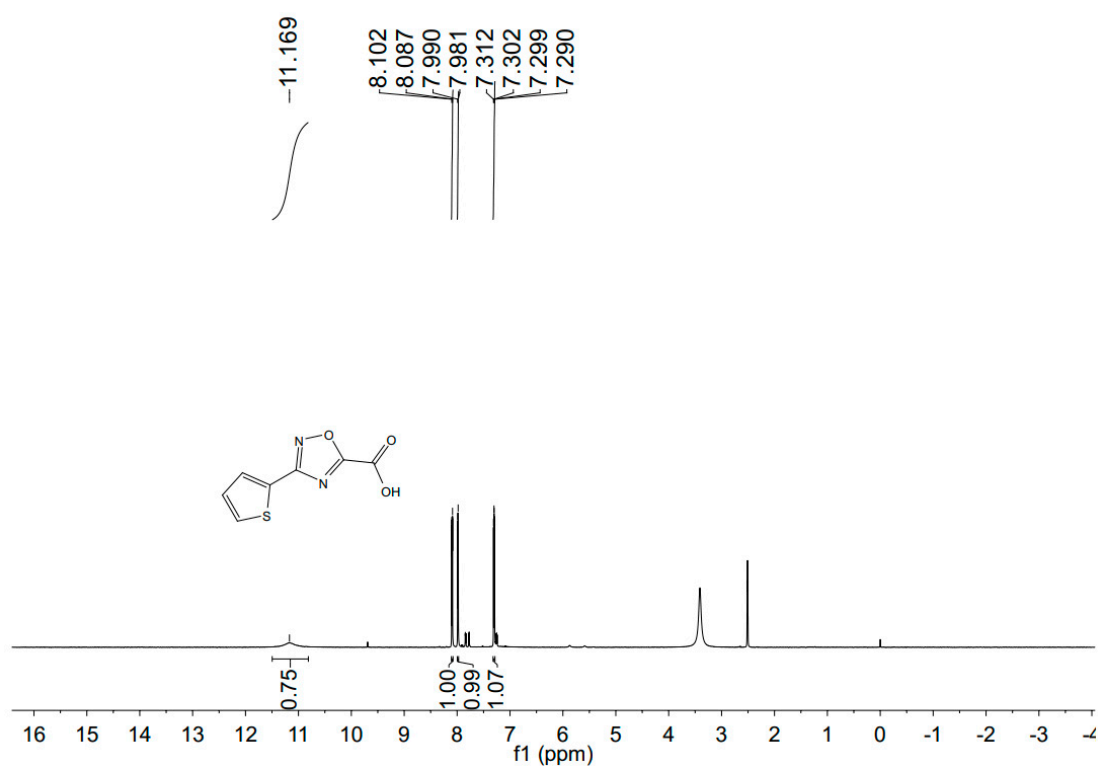<sup>1</sup>H NMR of intermediate **c4**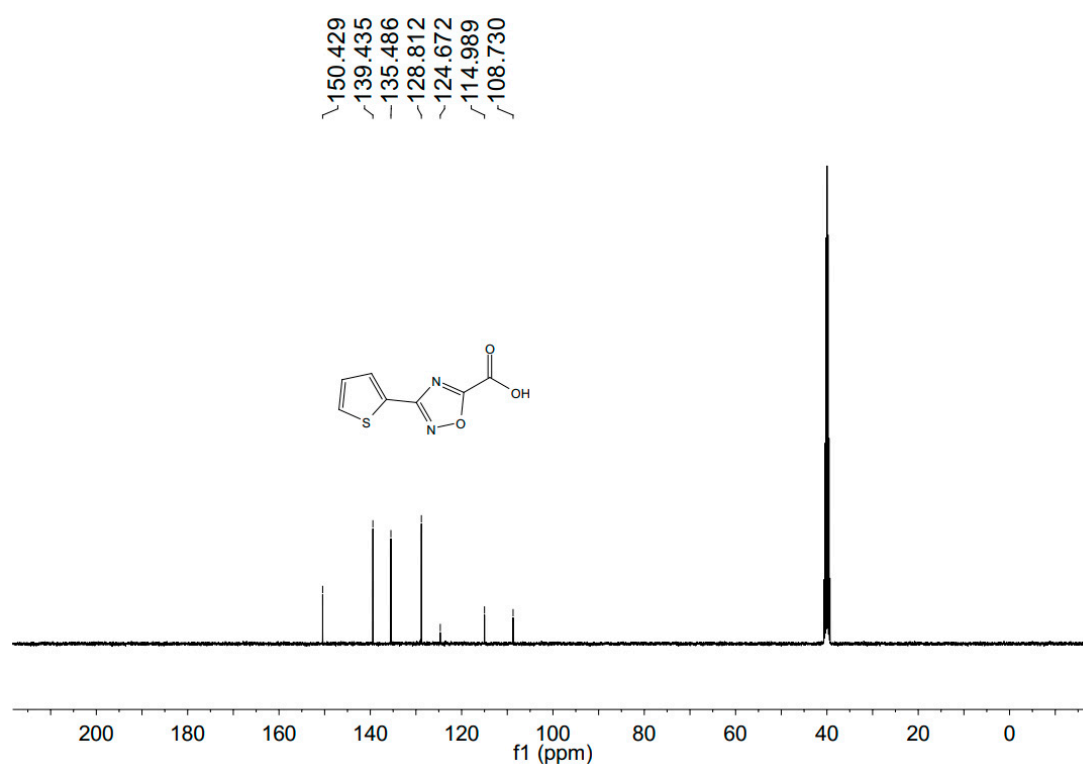<sup>13</sup>C NMR of intermediate **c4**



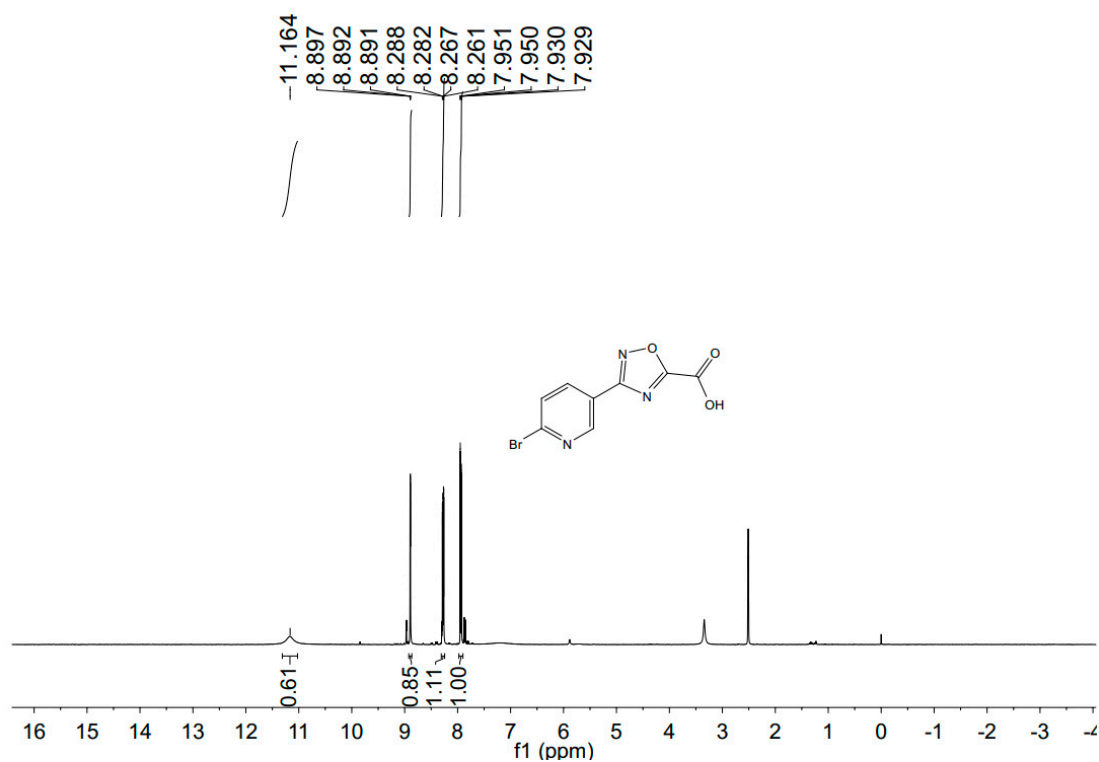<sup>1</sup>H NMR of intermediate **c5**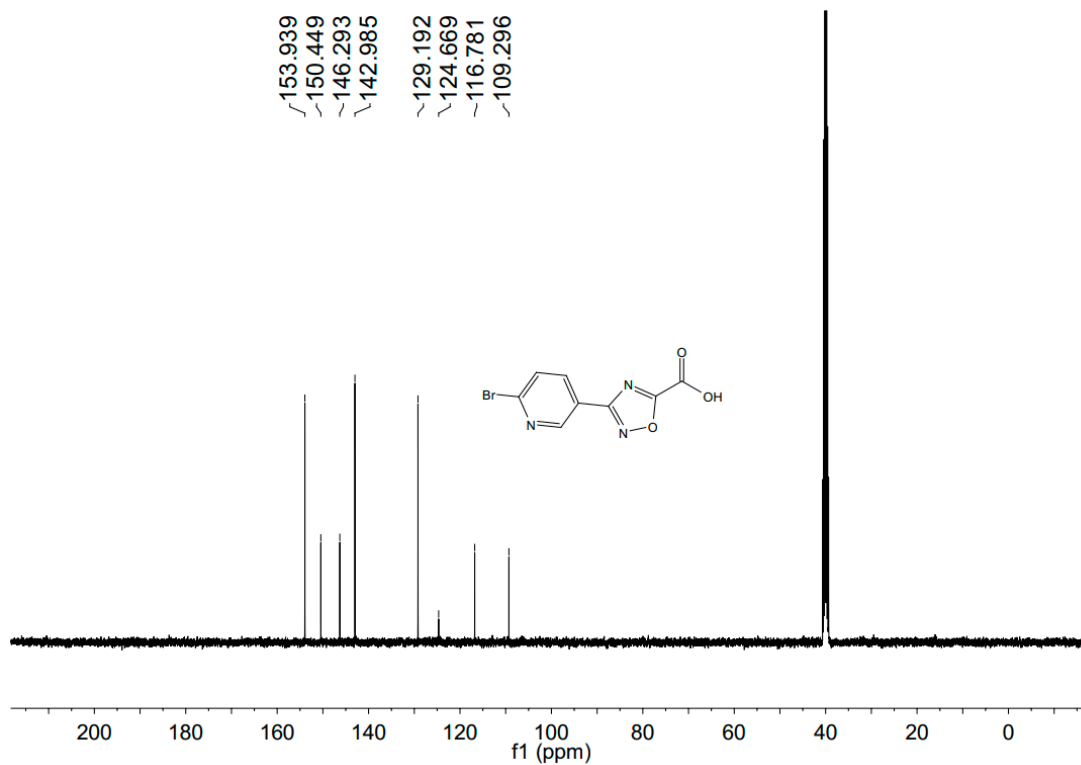<sup>13</sup>C NMR of intermediate **c5**

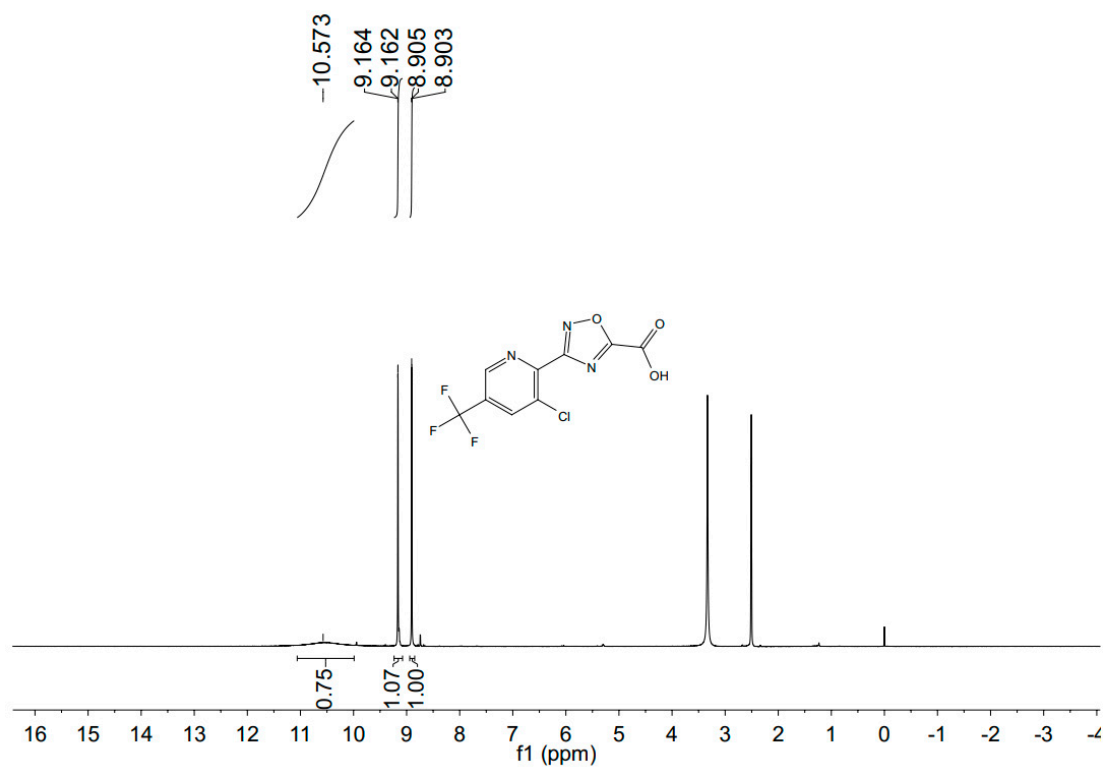<sup>1</sup>H NMR of intermediate **c6**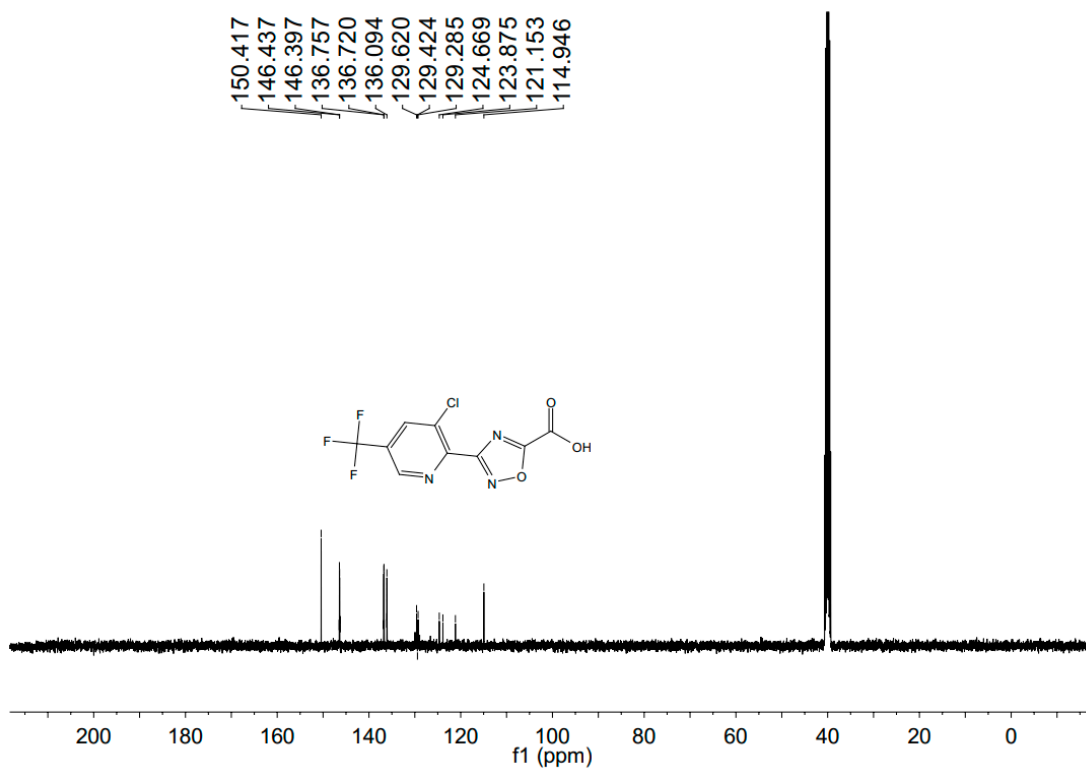<sup>13</sup>C NMR of intermediate **c6**

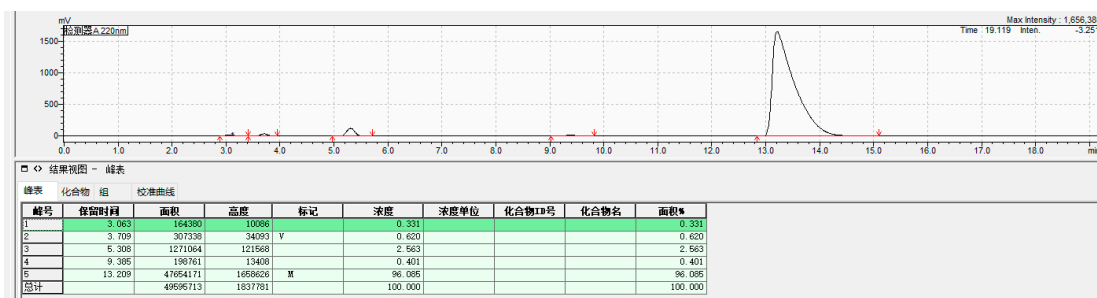

HPLC of compound F1

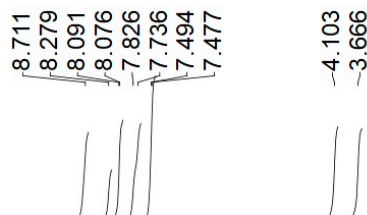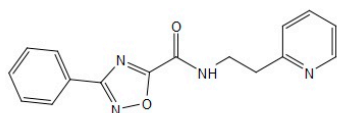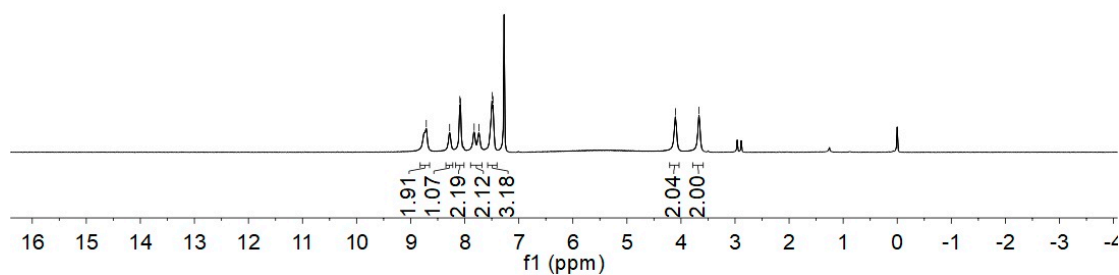<sup>1</sup>H NMR of compound F1

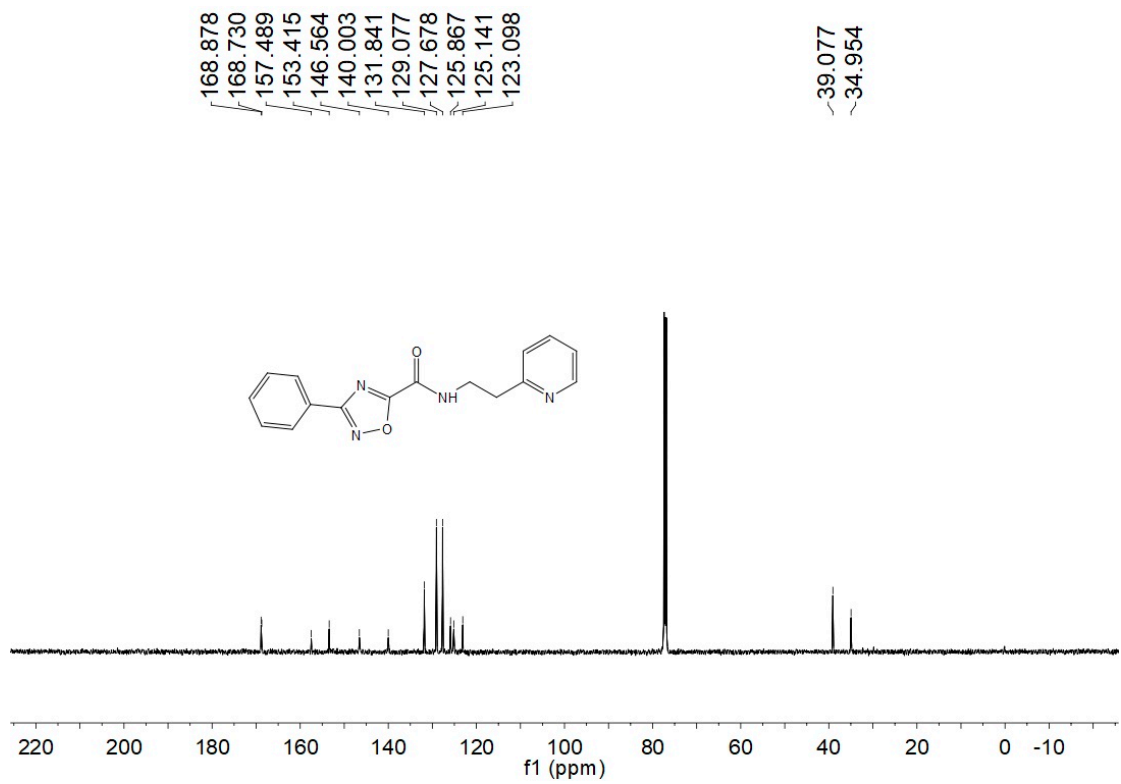

<sup>13</sup>C NMR of compound F1

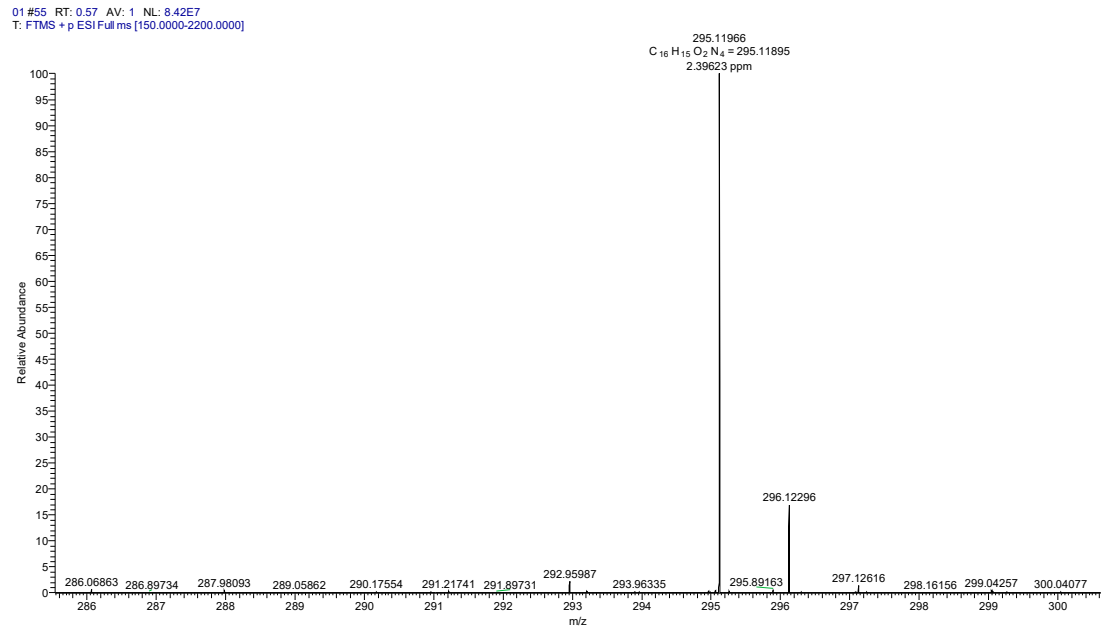

HRMS of compound F1

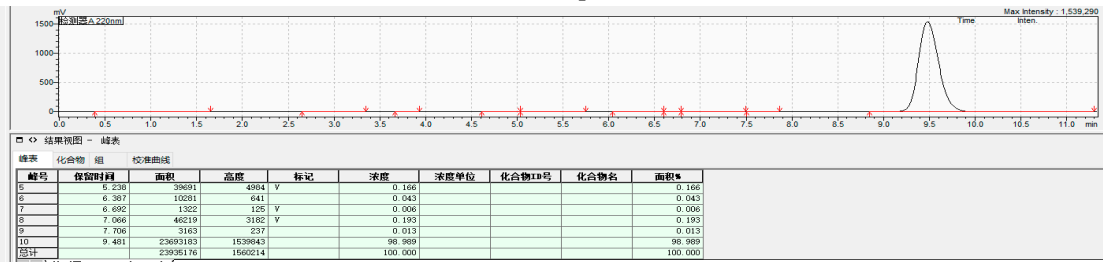

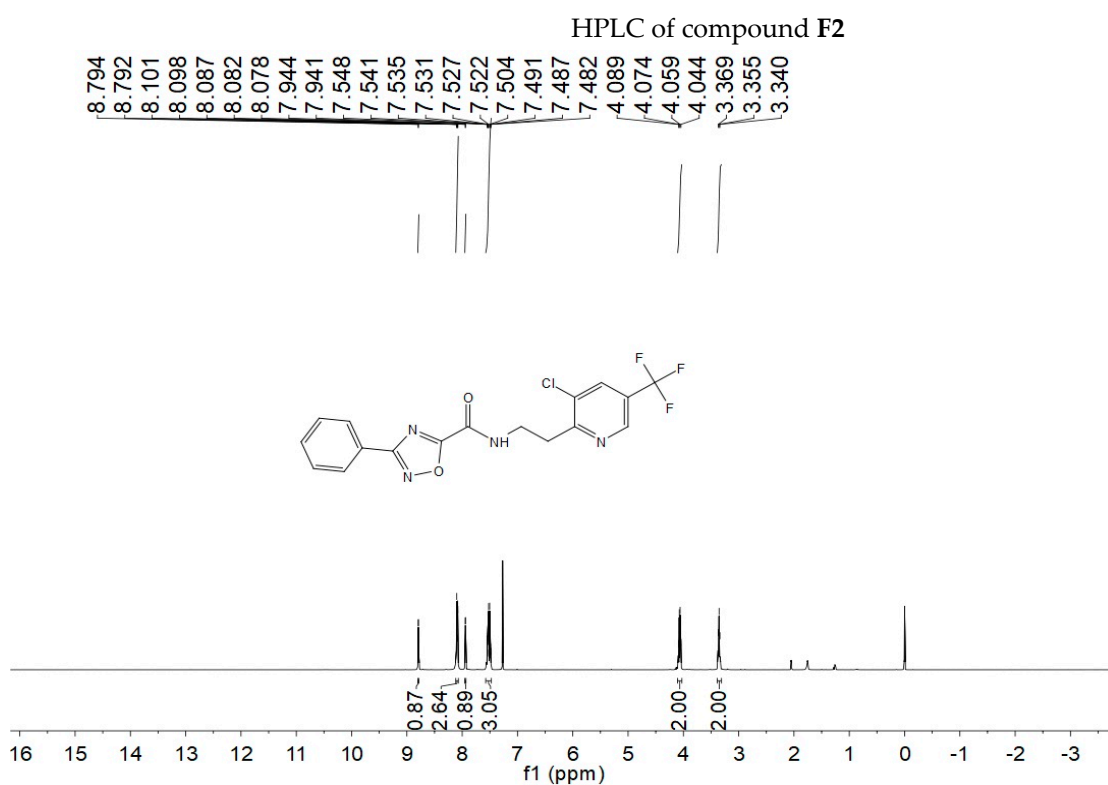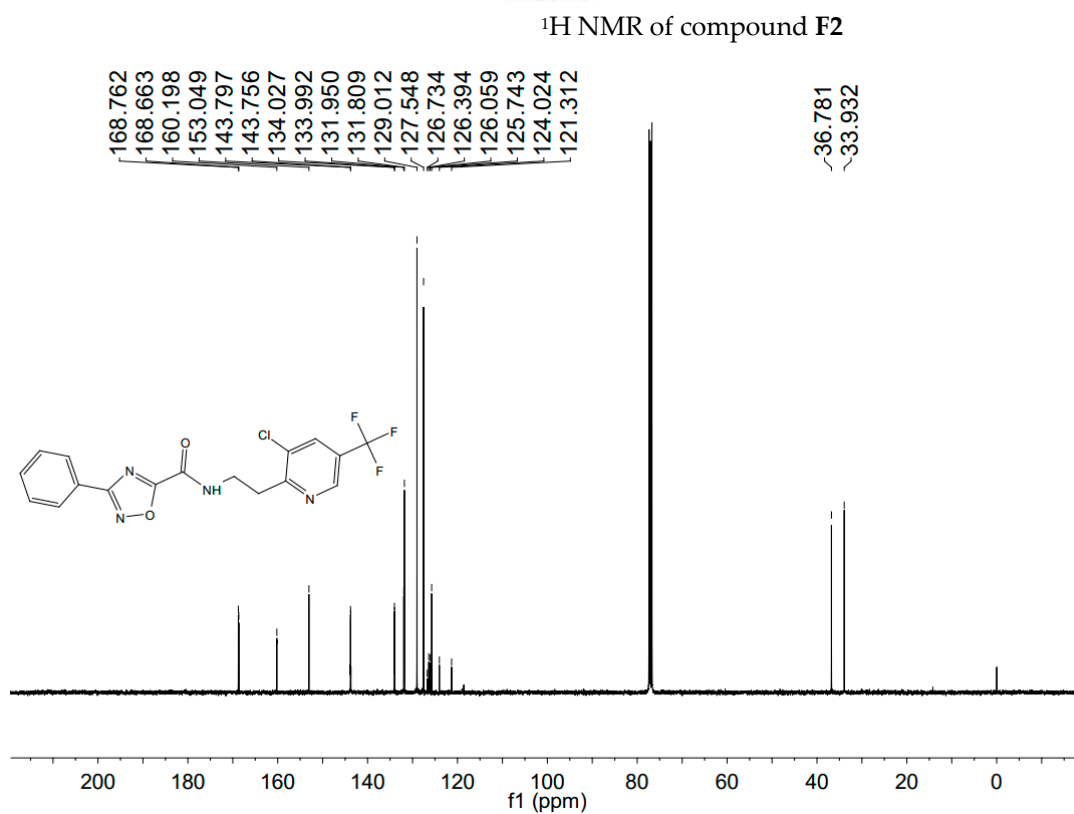

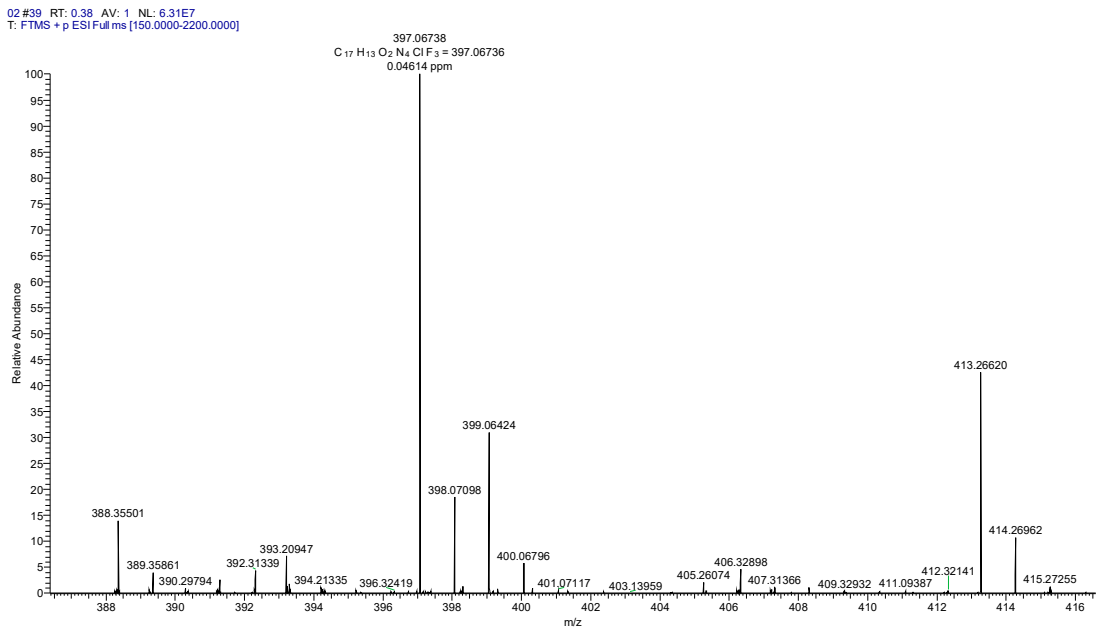

HRMS of compound F2

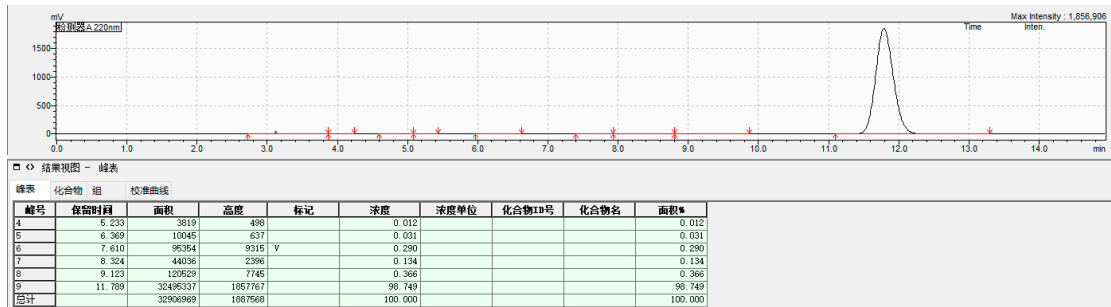

HPLC of compound F3

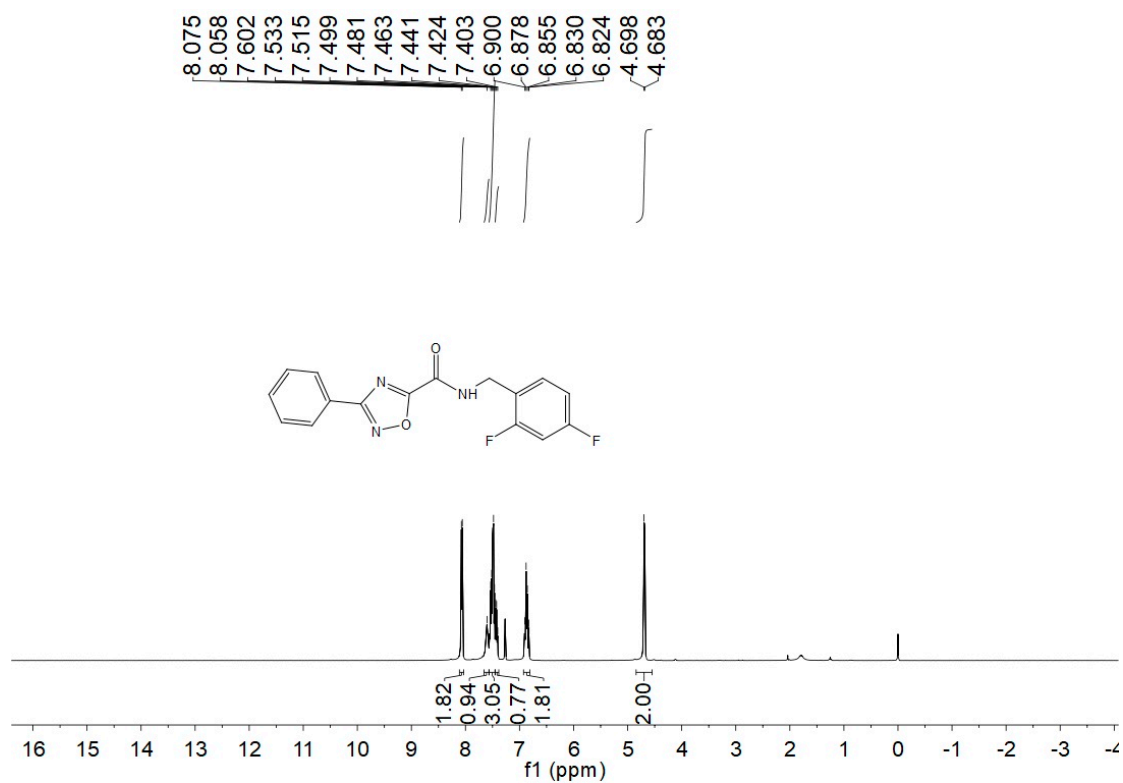<sup>1</sup>H NMR of compound F3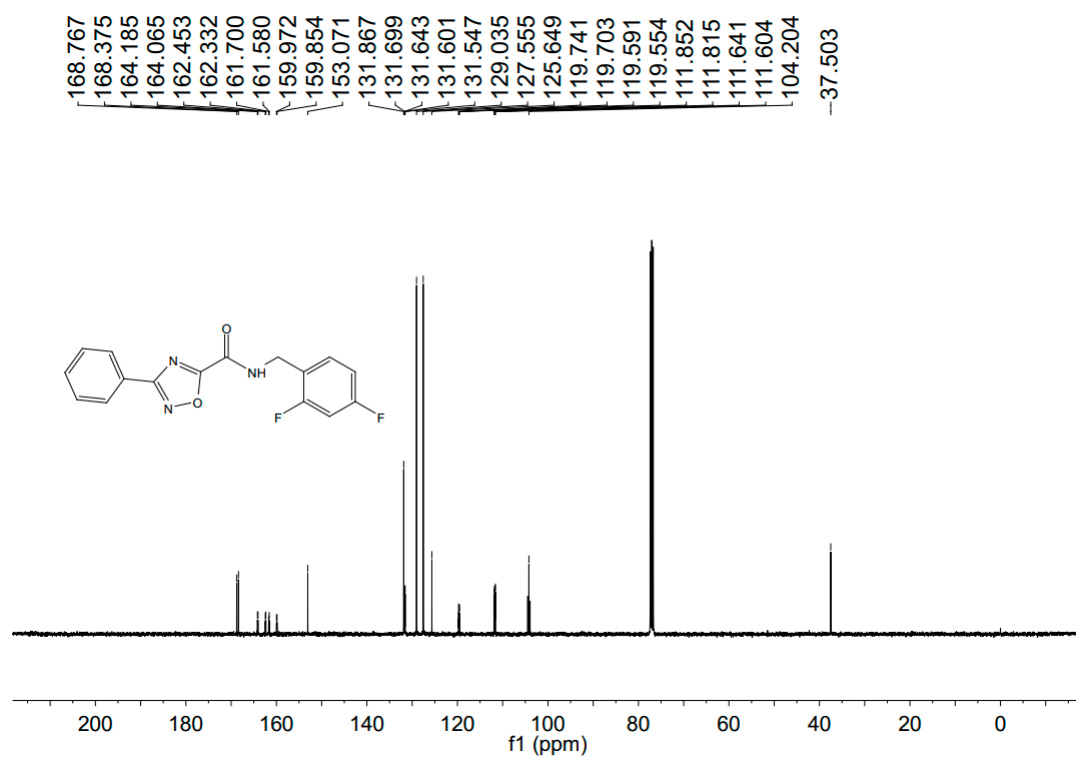<sup>13</sup>C NMR of compound F3

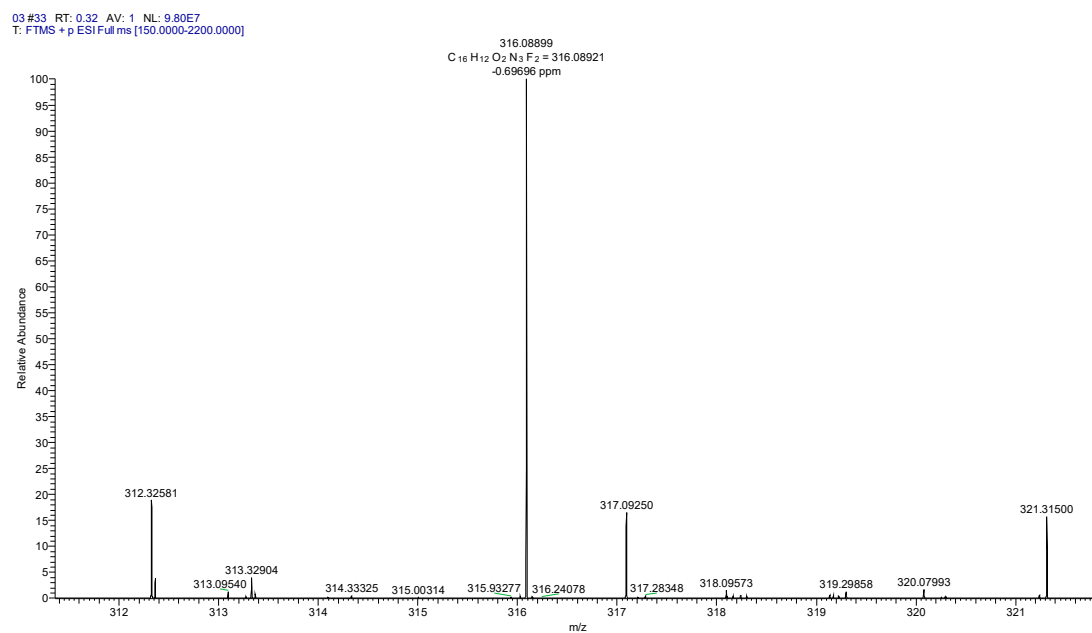

HRMS of compound F3

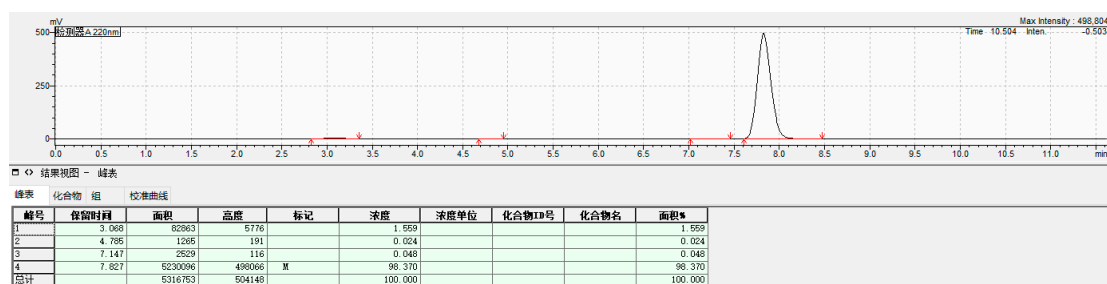

HPLC of compound F4



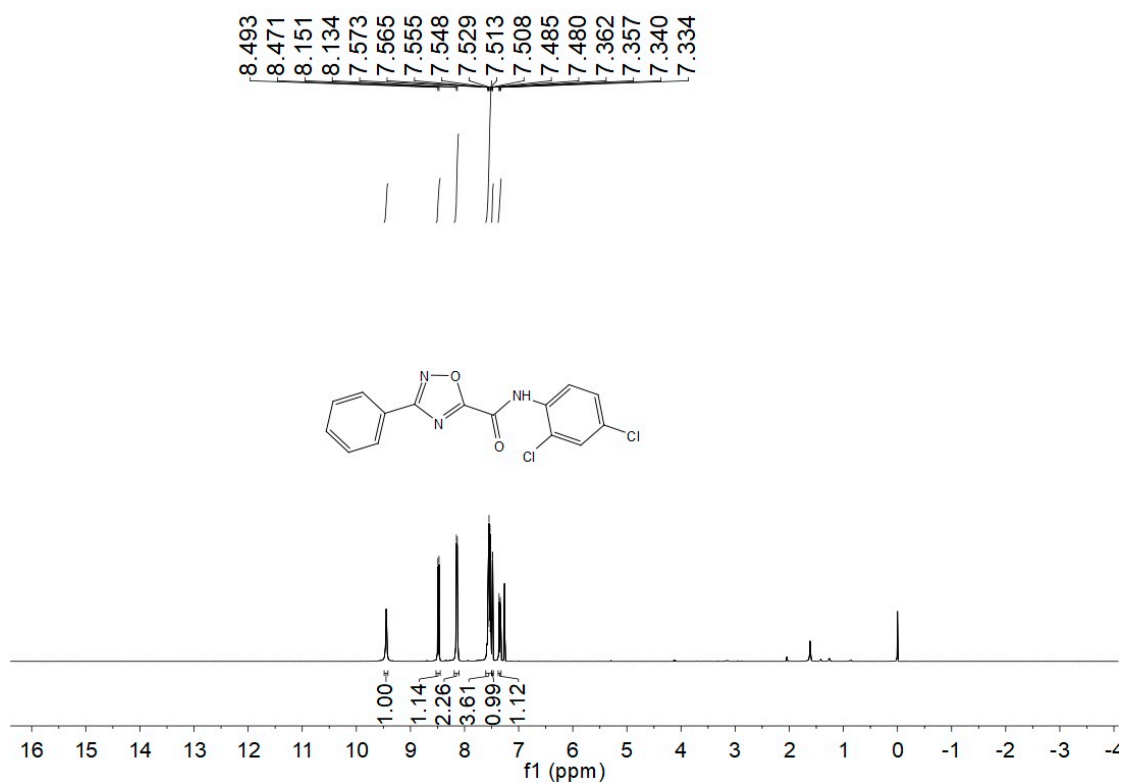<sup>1</sup>H NMR of compound F4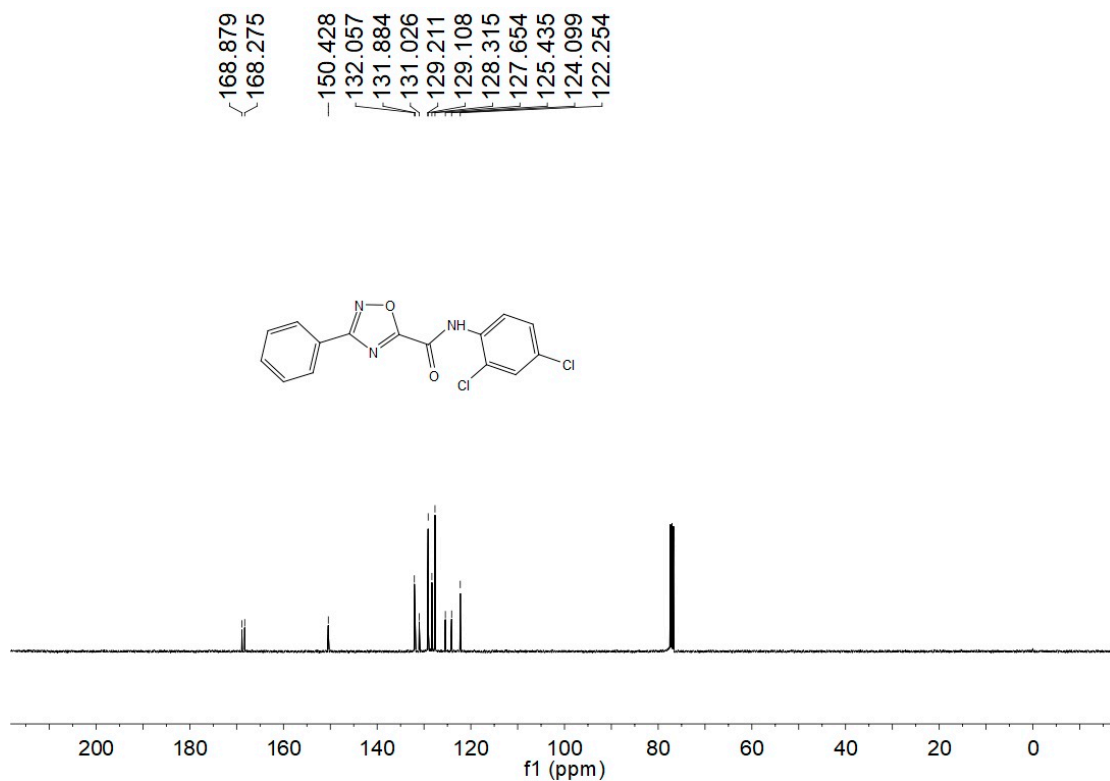

<sup>13</sup>C NMR of compound F4

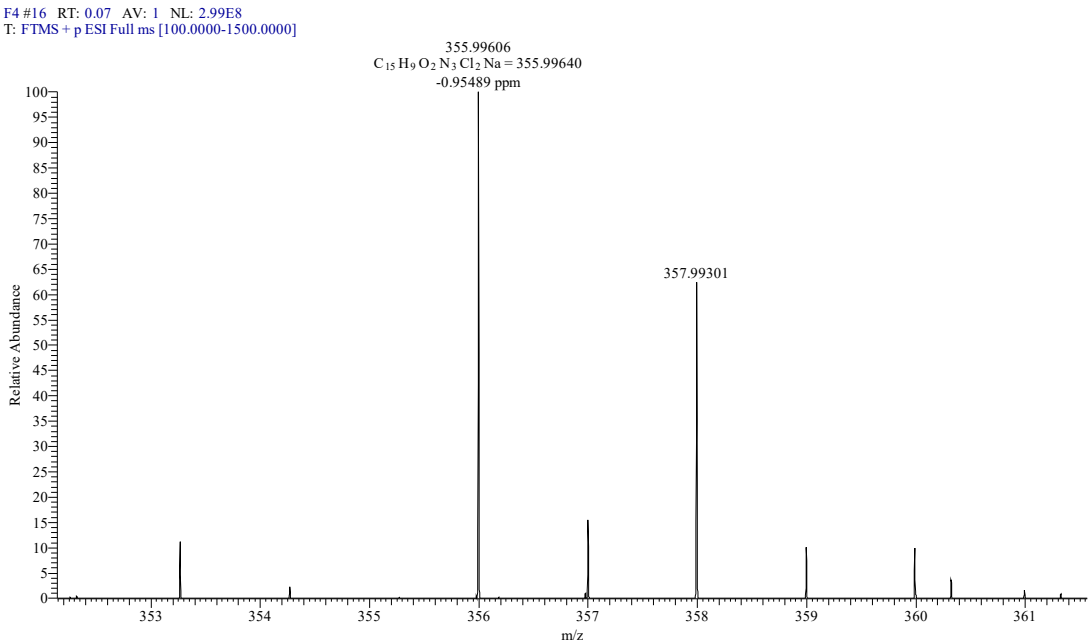

HRMS of compound F4

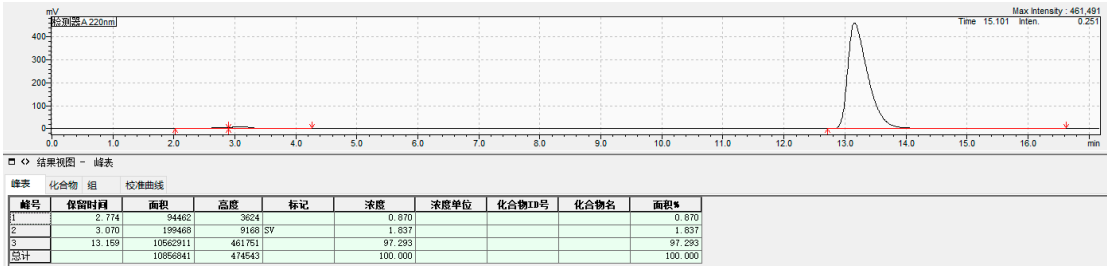

HPLC of compound F5

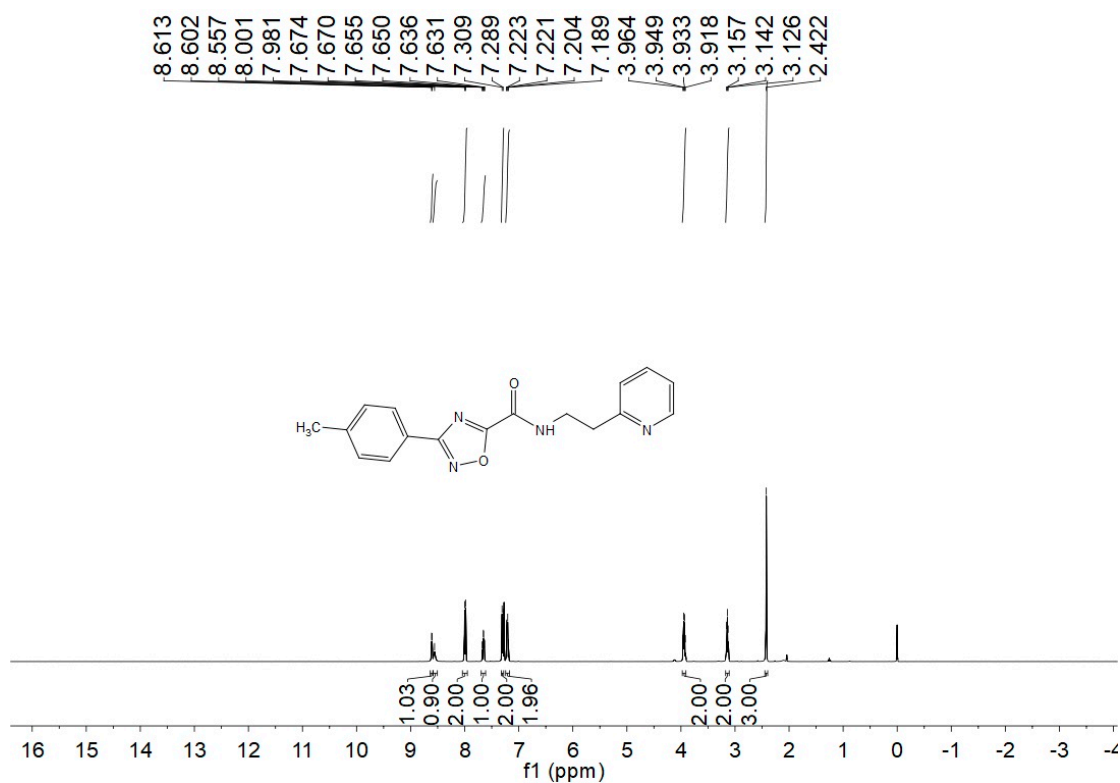<sup>1</sup>H NMR of compound F5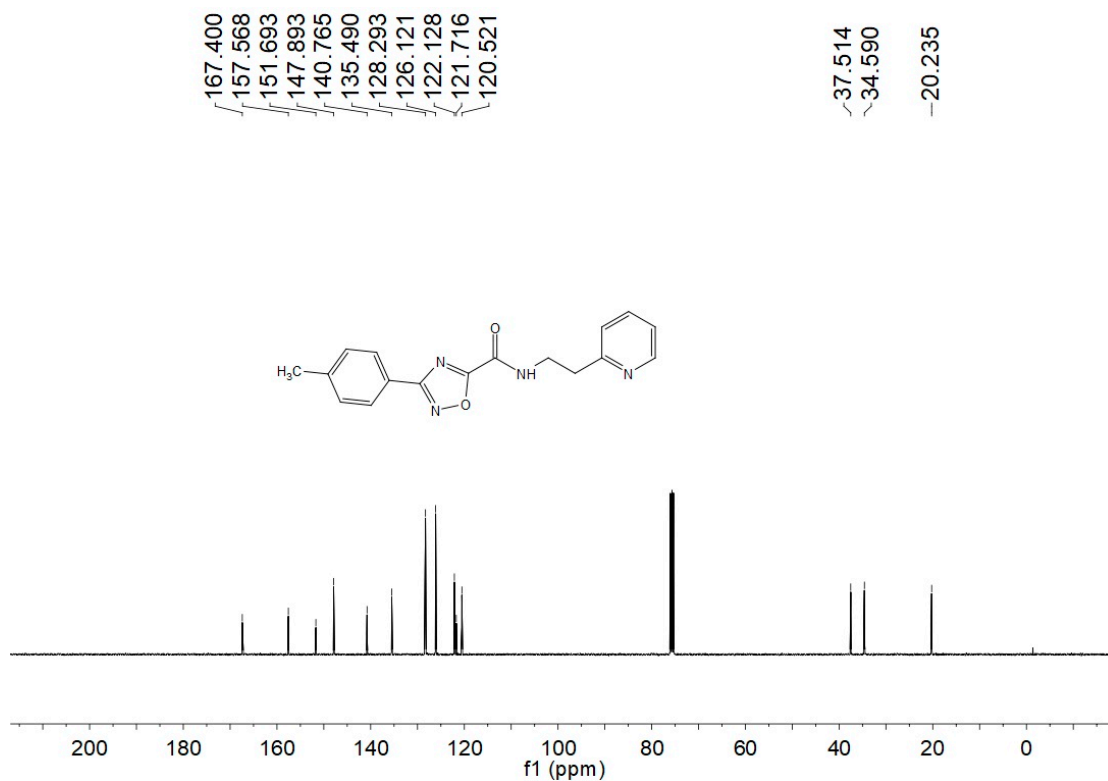<sup>13</sup>C NMR of compound F5

05 #33 RT: 0.32 AV: 1 NL: 4.07E9  
T: FTMS + p ESI Full ms [150.0000-2200.0000]

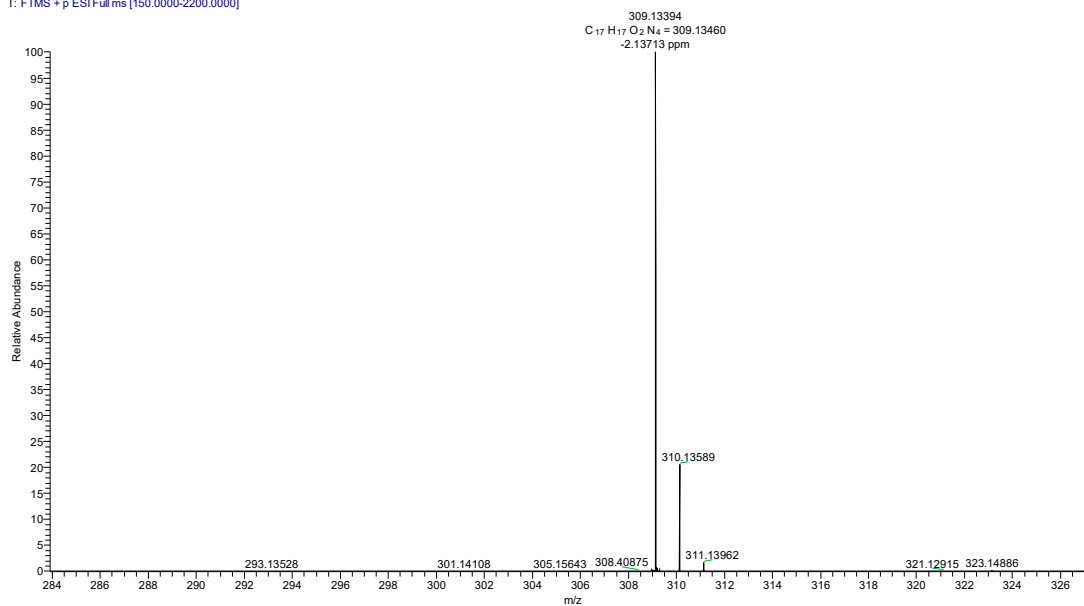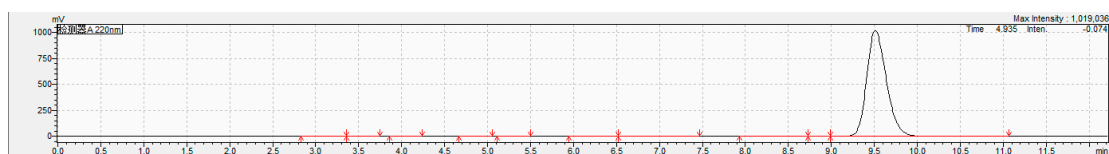

结果视图 - 峰表

| 峰号 | 保留时间  | 面积       | 高度      | 标记 | 浓度      | 浓度单位 | 化合物ID号 | 化合物名 | 面积%     |
|----|-------|----------|---------|----|---------|------|--------|------|---------|
| 5  | 5.317 | 6898     | 859     |    | 0.042   |      |        |      | 0.042   |
| 6  | 6.314 | 10051    | 619     |    | 0.061   |      |        |      | 0.061   |
| 7  | 6.971 | 20646    | 1231    |    | 0.126   |      |        |      | 0.126   |
| 8  | 6.268 | 52251    | 2650    |    | 0.319   |      |        |      | 0.319   |
| 9  | 6.896 | 1167     | 99      | Y  | 0.007   |      |        |      | 0.007   |
| 10 | 9.512 | 16198329 | 1019277 | Y  | 96.880  |      |        |      | 96.880  |
| 总计 |       | 16381849 | 1031512 |    | 100.000 |      |        |      | 100.000 |

HRMS of compound F5

HPLC of compound F6

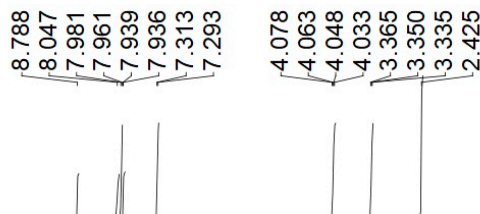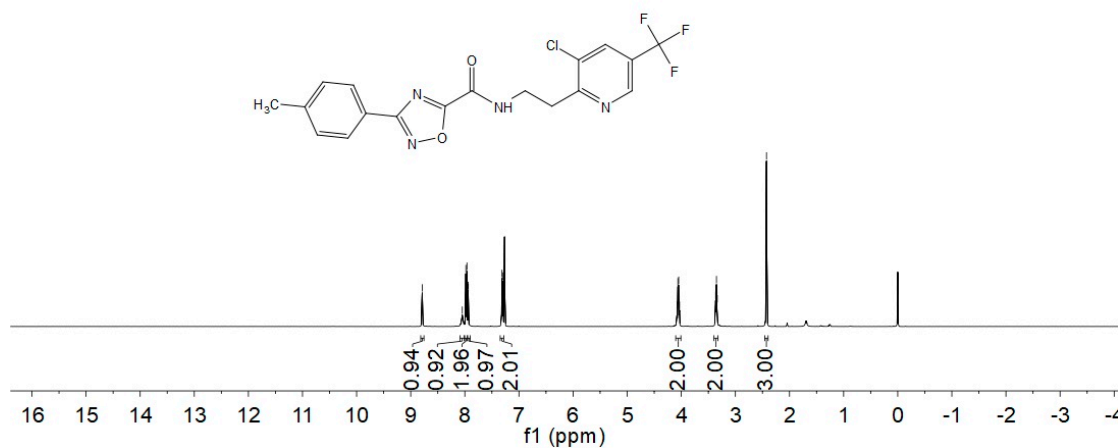<sup>1</sup>H NMR of compound F6

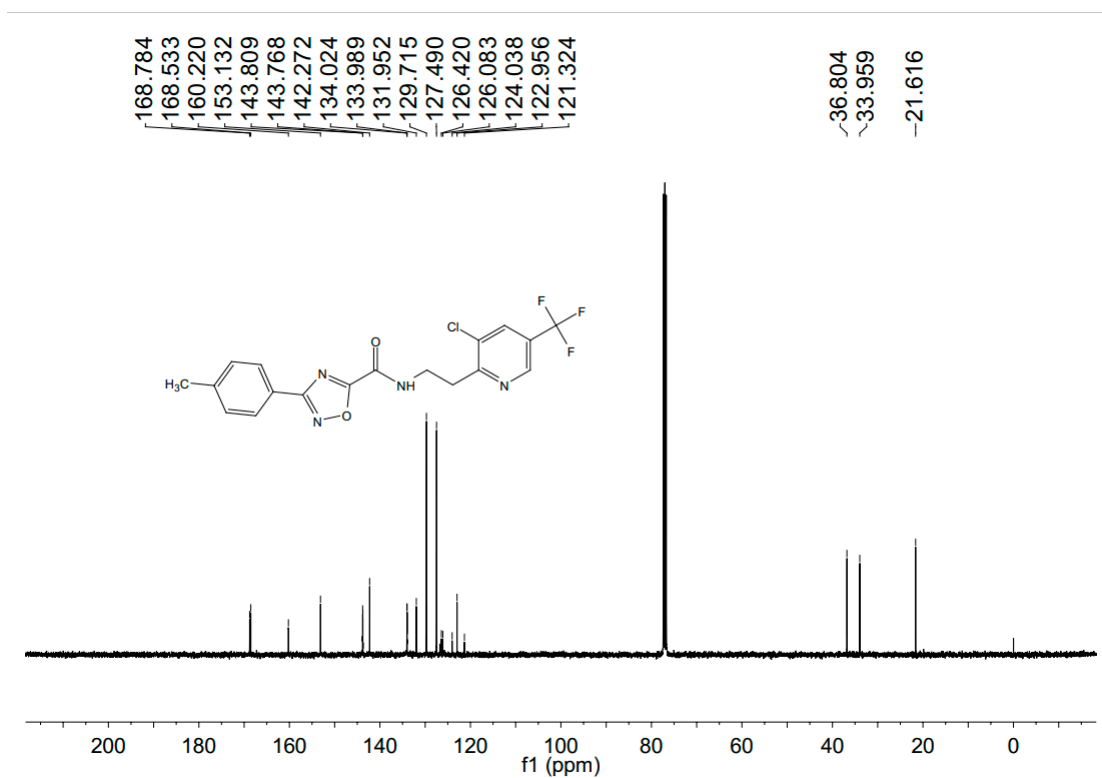<sup>13</sup>C NMR of compound F6

06 #43 RT: 0.42 AV: 1 NL: 4.81E7  
T: FTMS + p ESI Full ms [150.0000-2200.0000]

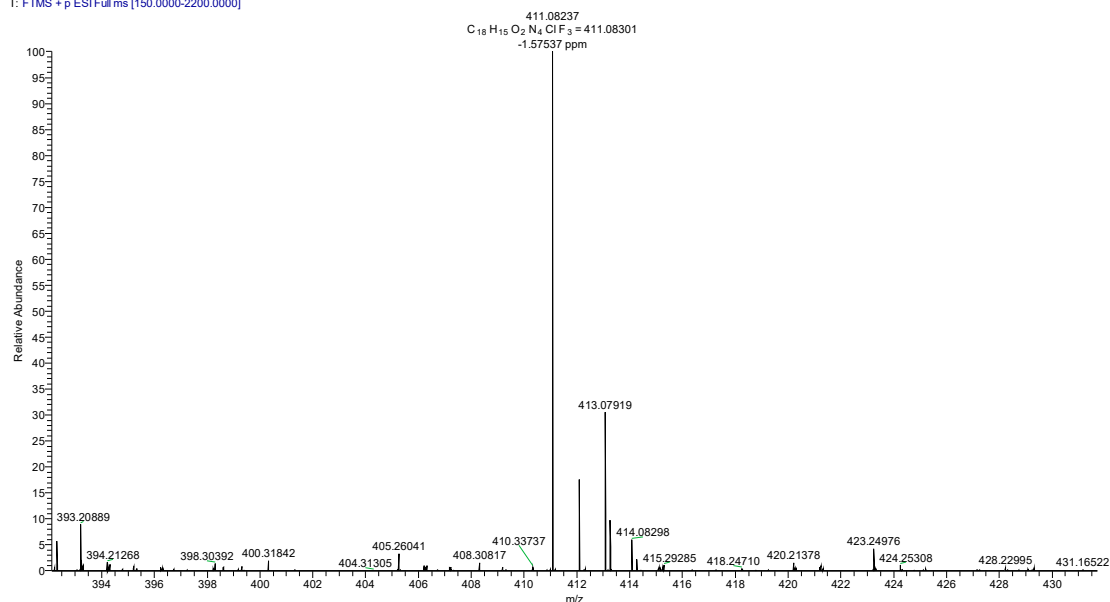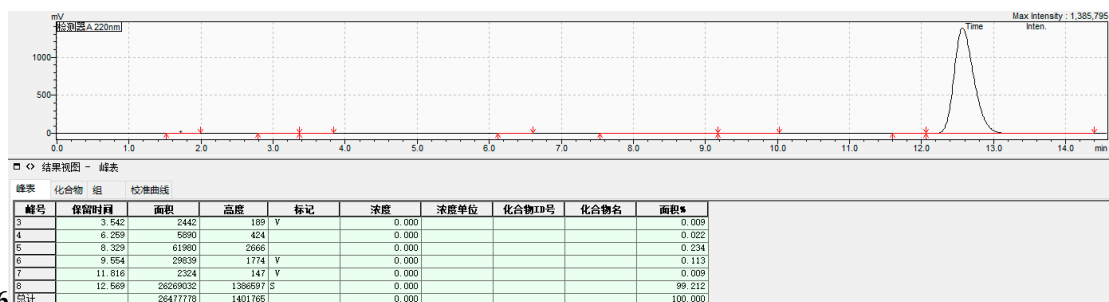

HRMS of compound F6

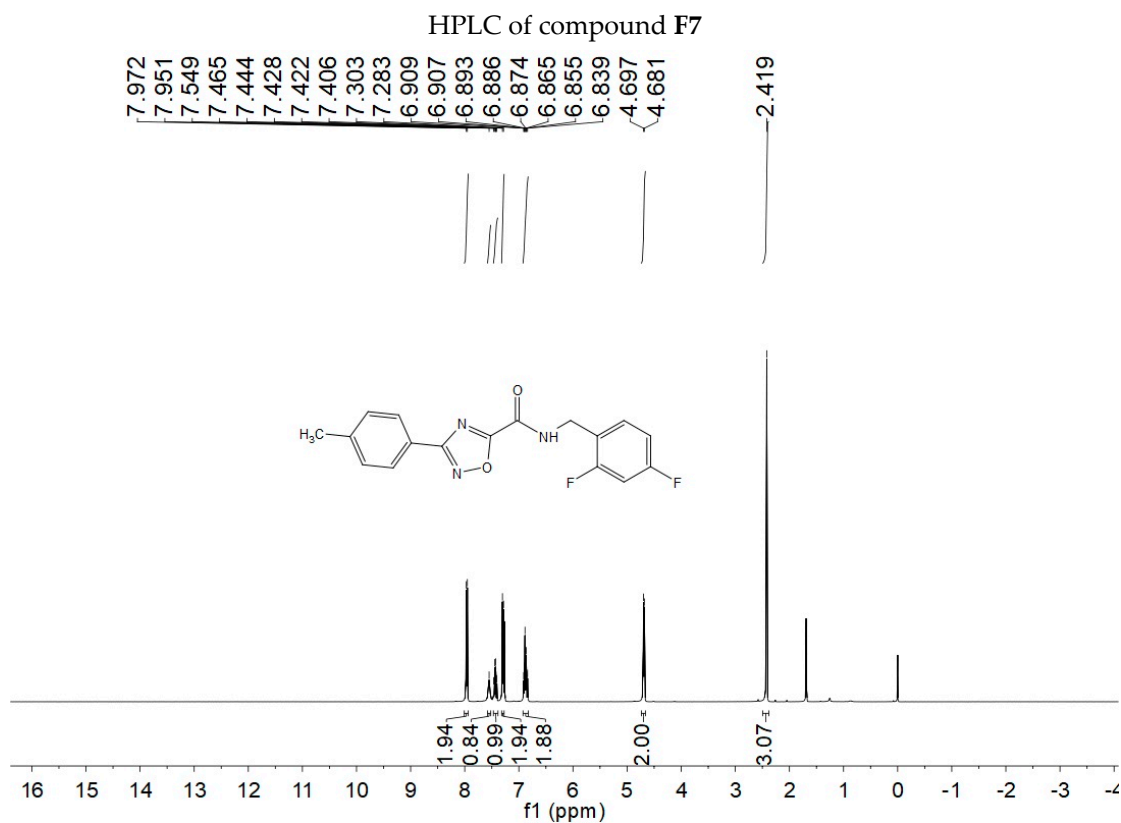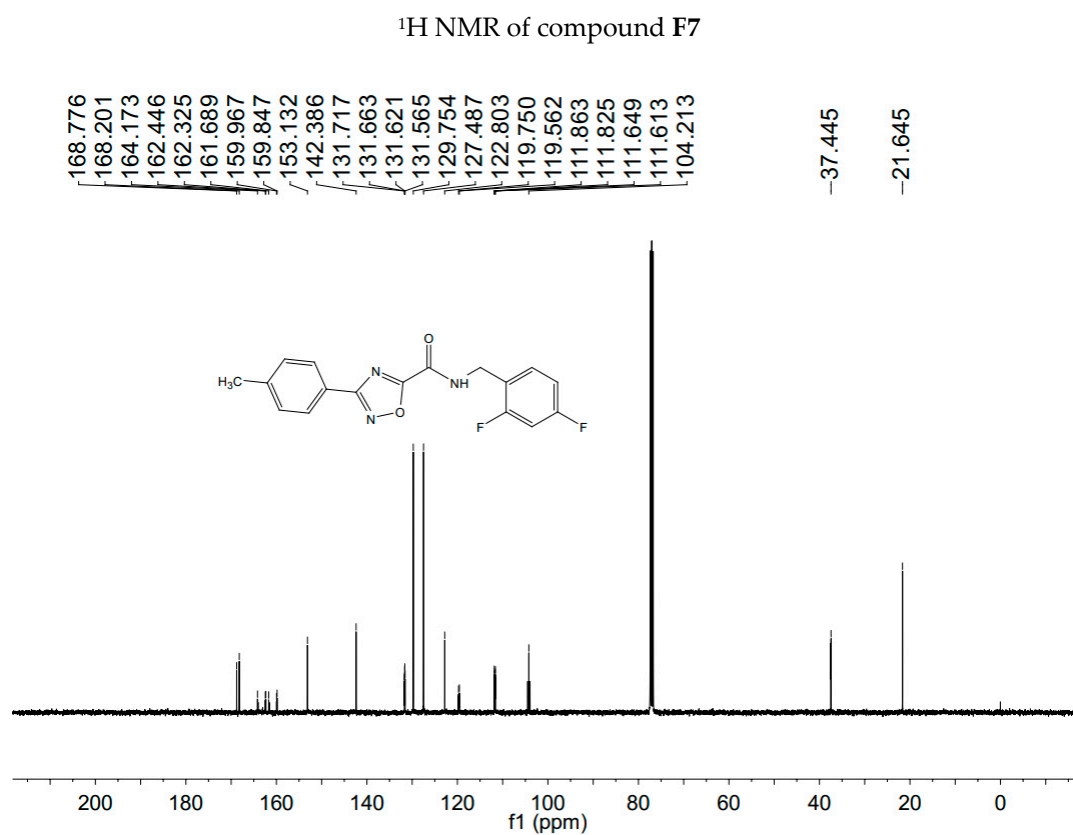 $^{13}\text{C}$  NMR of compound F7

07 #37 RT: 0.36 AV: 1 NL: 9.65E7  
T: FTMS + p ESI Full ms [150.0000-2200.0000]

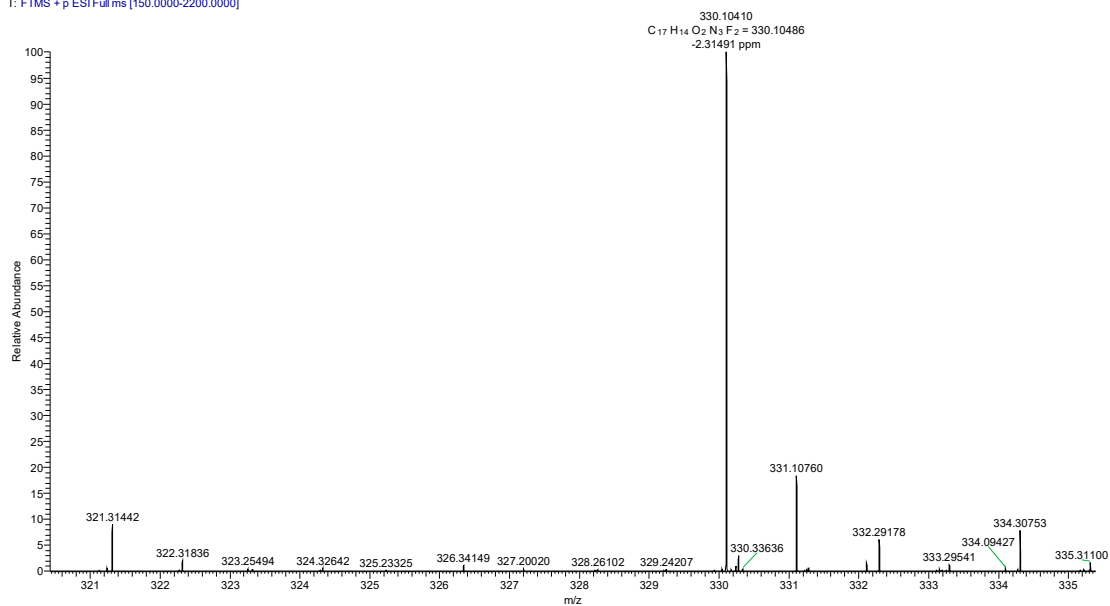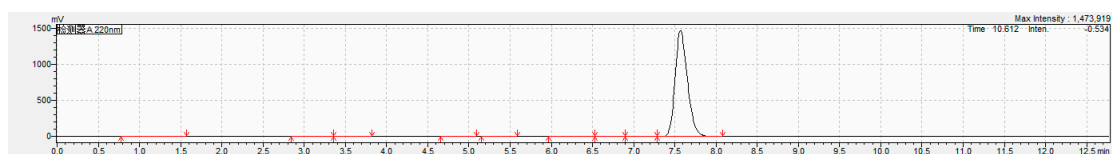

结果视图 - 峰表

| 峰号 | 化合物 | 组 | 校准曲线 | 保留时间     | 面积       | 高度      | 标记 | 浓度      | 浓度单位 | 化合物ID号 | 化合物名 | 面积%     |
|----|-----|---|------|----------|----------|---------|----|---------|------|--------|------|---------|
| 4  |     |   |      | 4.847    | 9752     | 1327    |    | 0.063   |      |        |      | 0.063   |
| 5  |     |   |      | 5.326    | 8399     | 1074    |    | 0.055   |      |        |      | 0.055   |
| 6  |     |   |      | 6.226    | 14946    | 1055    | V  | 0.097   |      |        |      | 0.097   |
| 7  |     |   |      | 6.685    | 7665     | 895     | V  | 0.050   |      |        |      | 0.050   |
| 8  |     |   |      | 7.074    | 5625     | 550     |    | 0.037   |      |        |      | 0.037   |
| 9  |     |   |      | 7.569    | 15259504 | 1474303 | V  | 99.126  |      |        |      | 99.126  |
| 总计 |     |   |      | 15394047 | 1485312  |         |    | 100.000 |      |        |      | 100.000 |

HRMS of compound F7

HPLC of compound F8

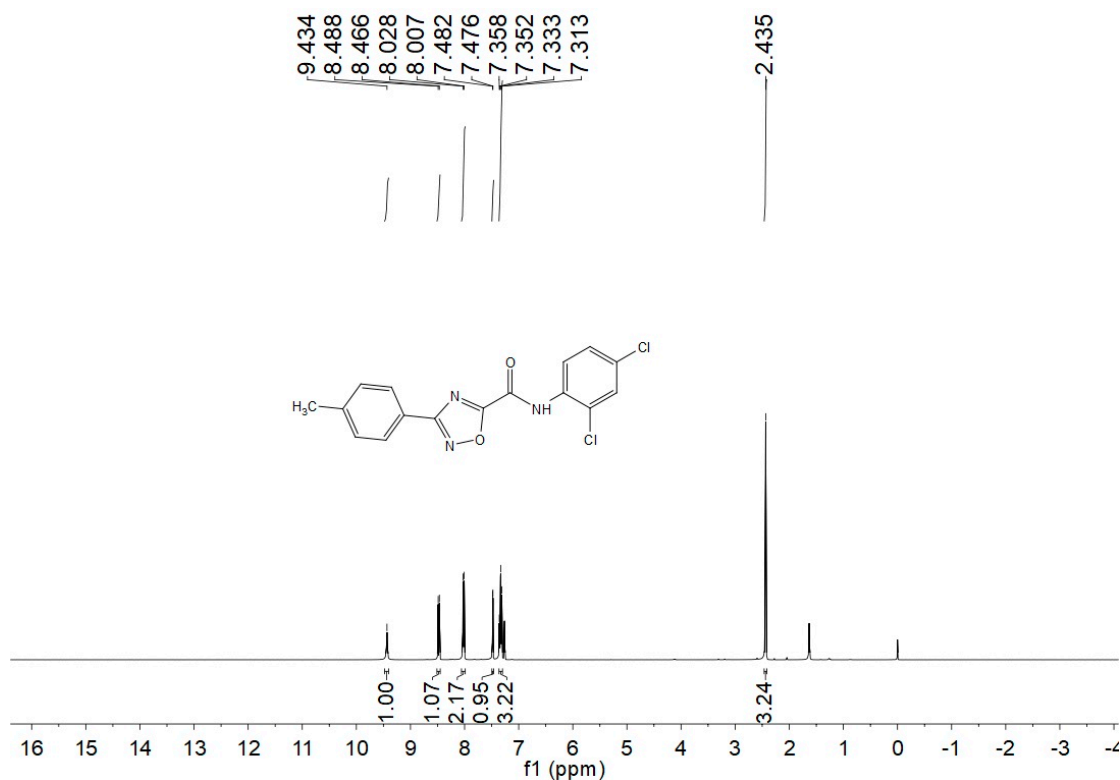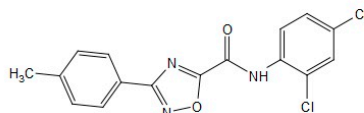

<sup>1</sup>H NMR of compound F8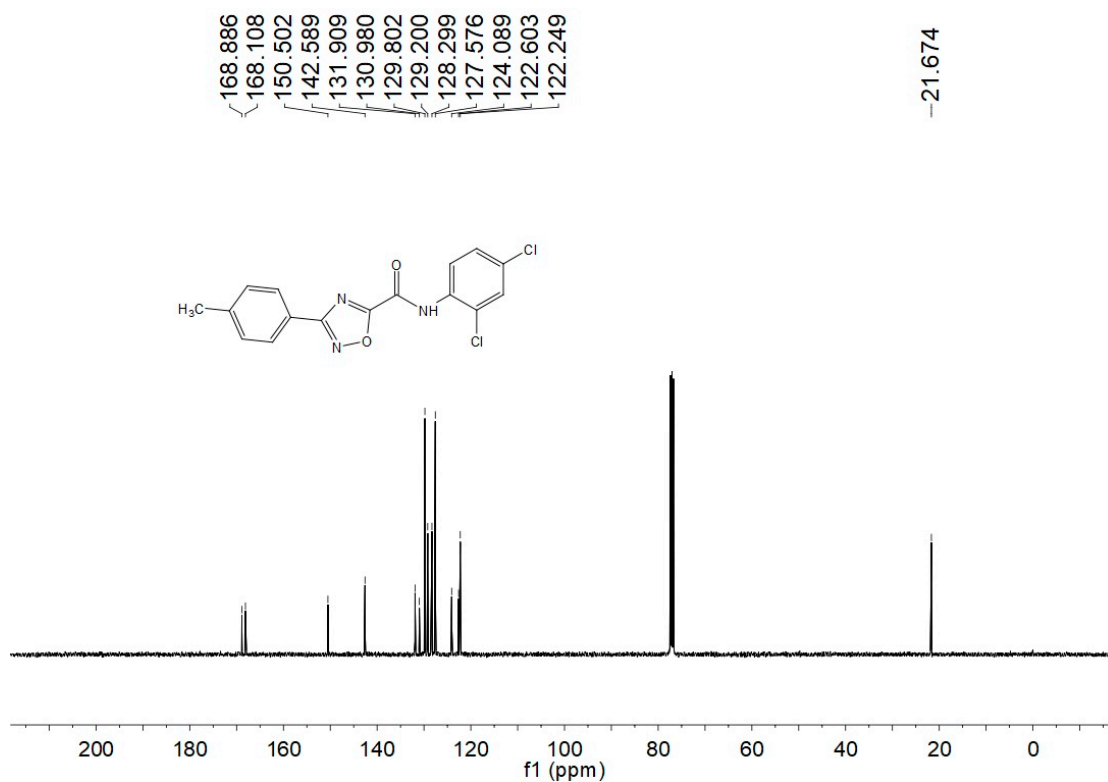<sup>13</sup>C NMR of compound F8

F8 #60 RT: 0.27 AV: 1 NL: 5.43E8  
T: FTMS + p ESI Full ms [100.0000-1500.0000]

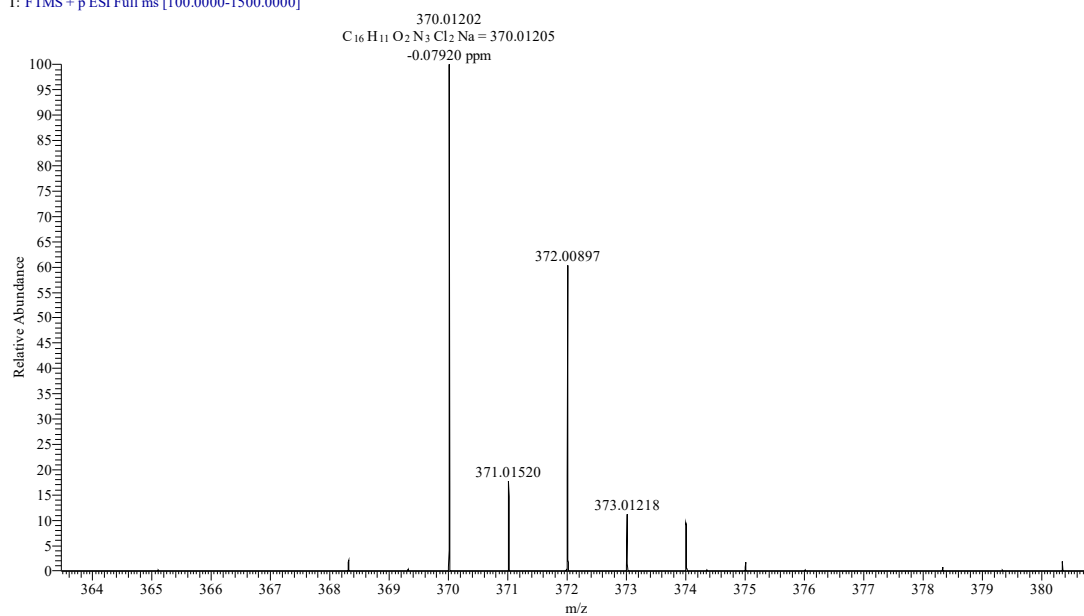



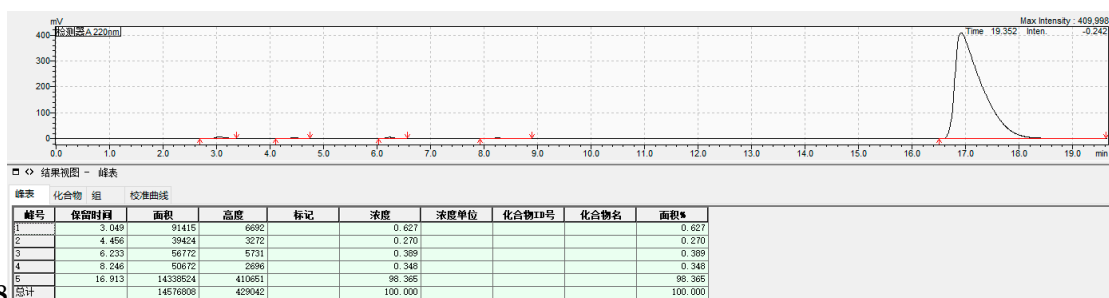

HRMS of compound F8

HPLC of compound F9

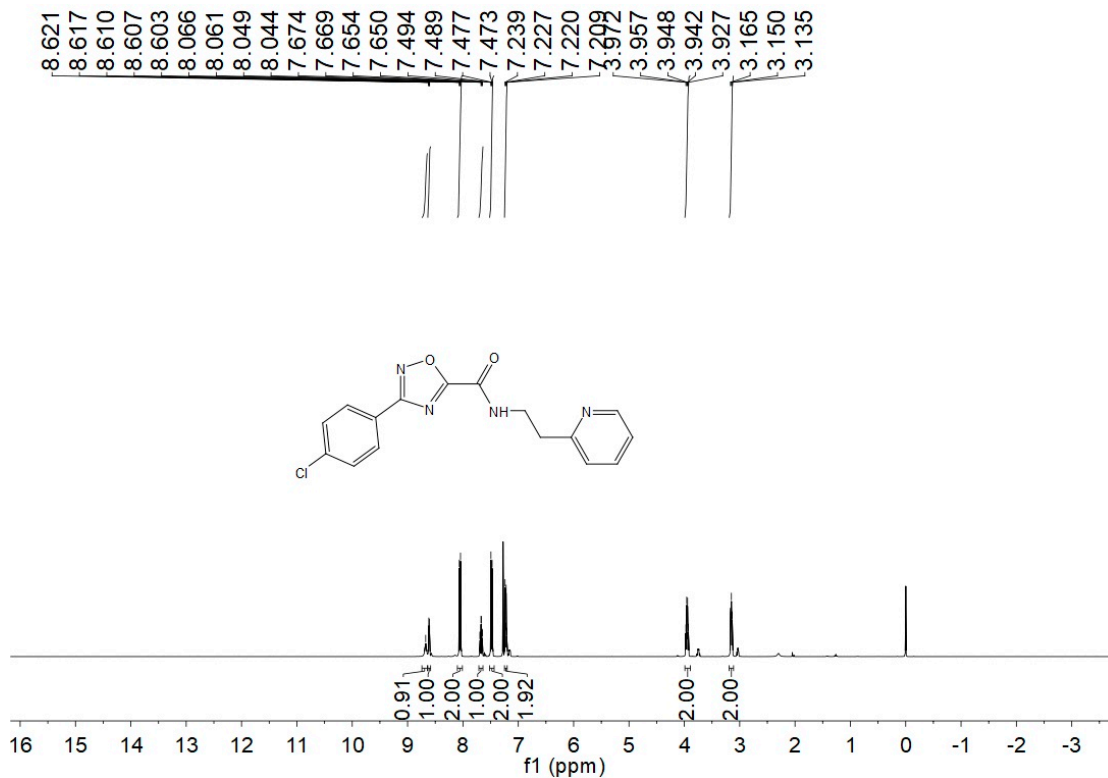<sup>1</sup>H NMR of compound F9

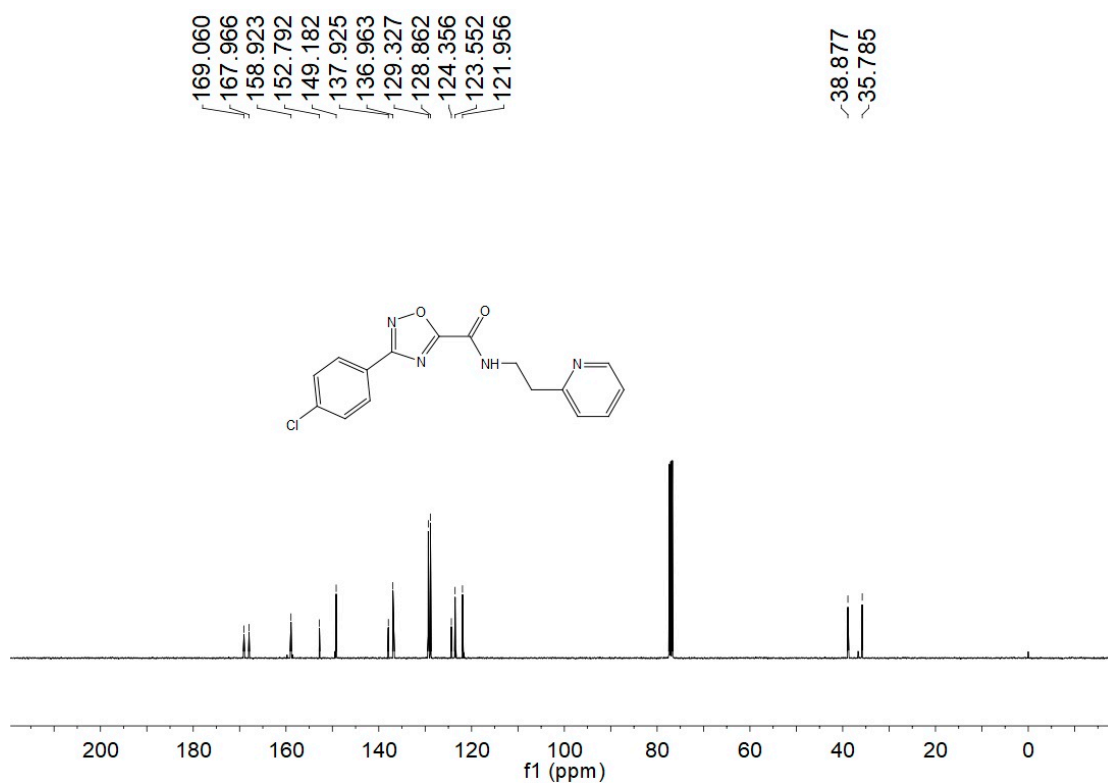<sup>13</sup>C NMR of compound F9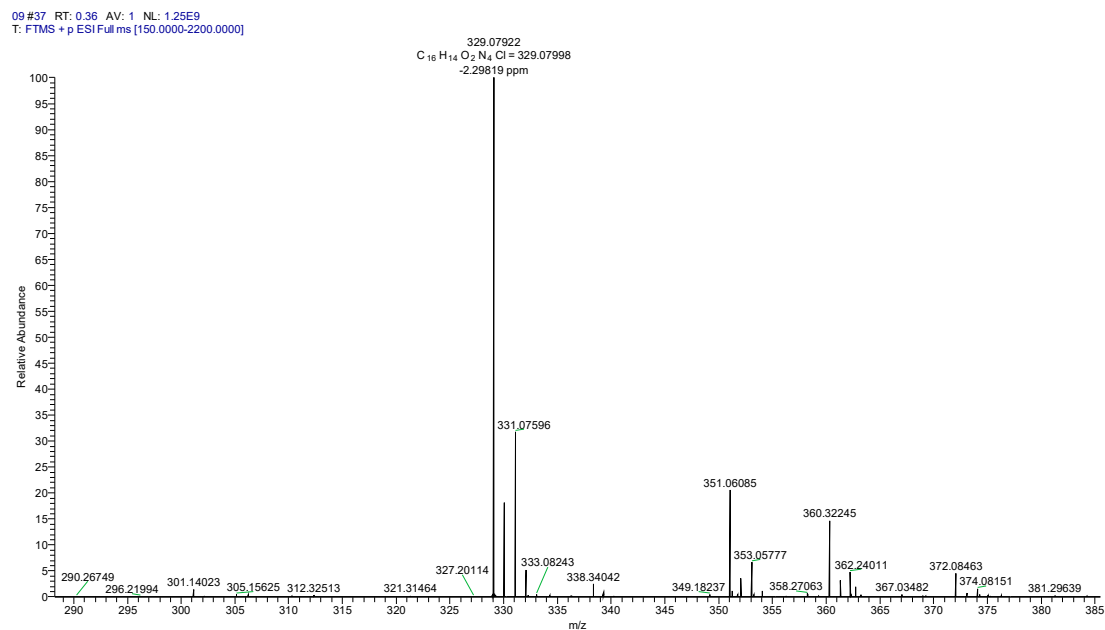

HRMS of compound F9

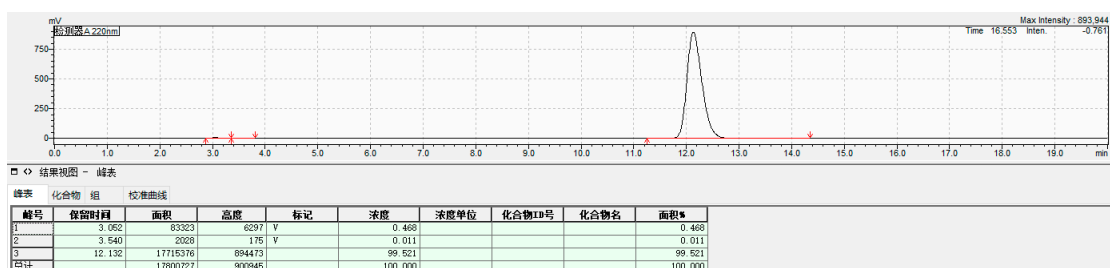

## HPLC of compound F10

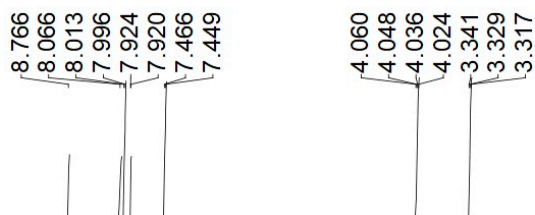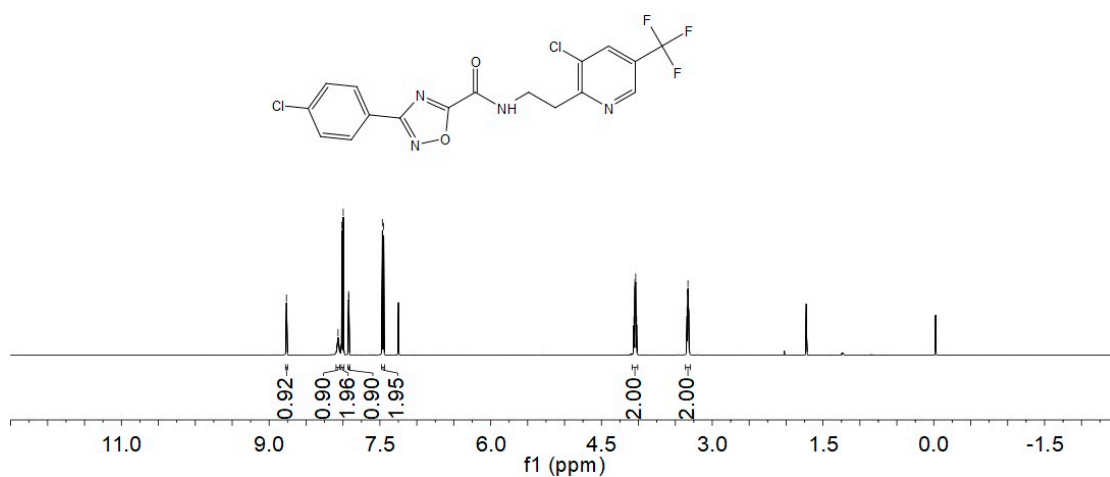<sup>1</sup>H NMR of compound F10

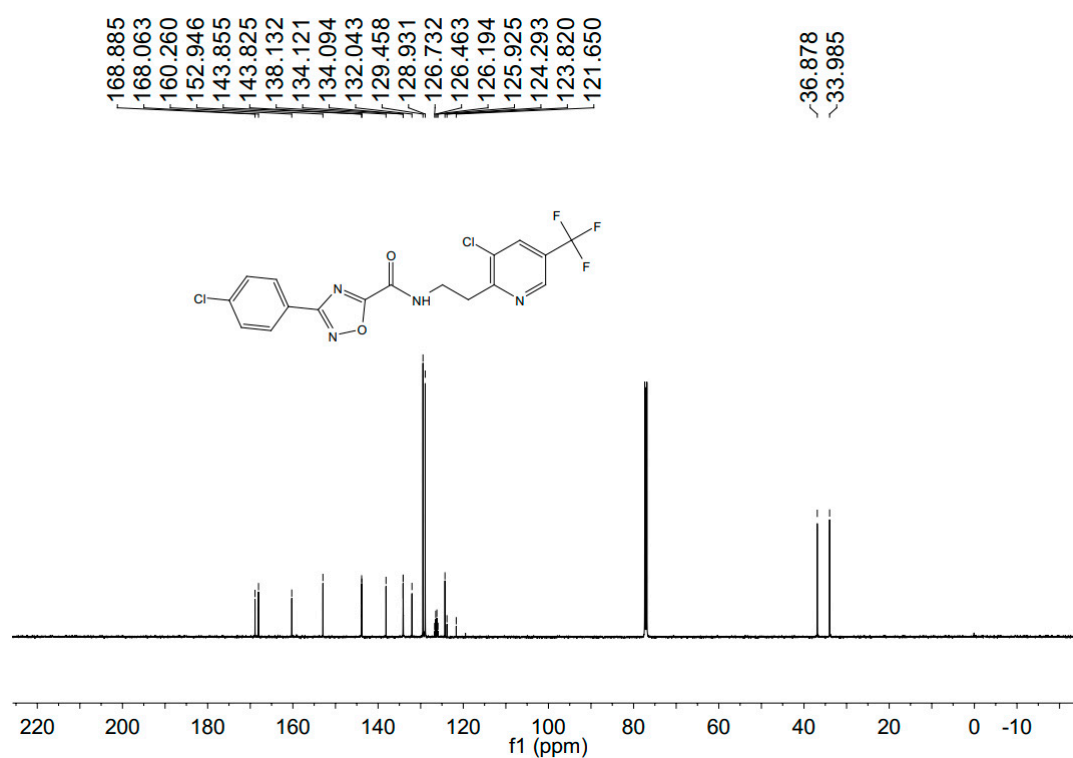<sup>13</sup>C NMR of compound F10

10 #45 RT: 0.44 AV: 1 NL: 5.60E7  
T: FTMS + p ESI Full ms [150.0000-2200.0000]

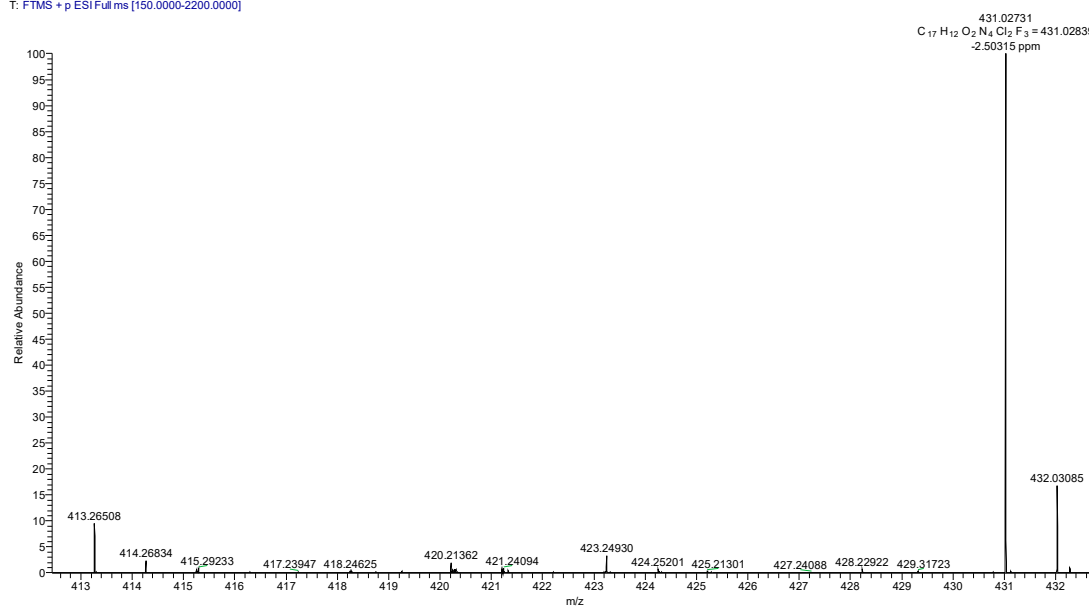

## HRMS of compound F10

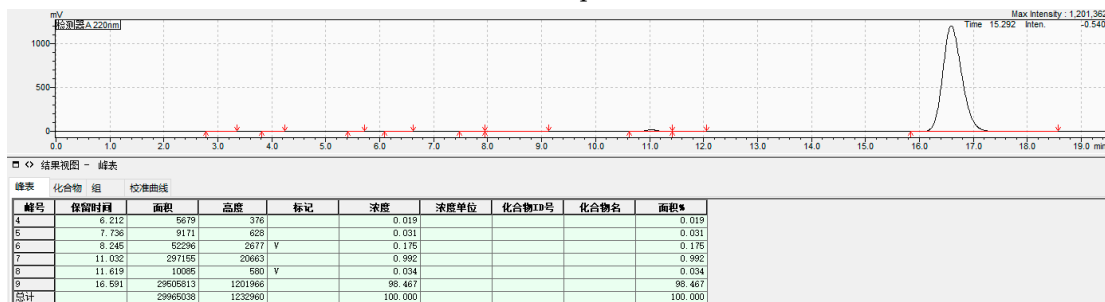

## HPLC of compound F11

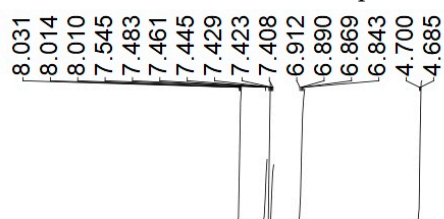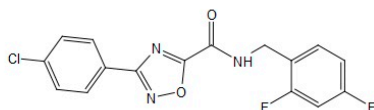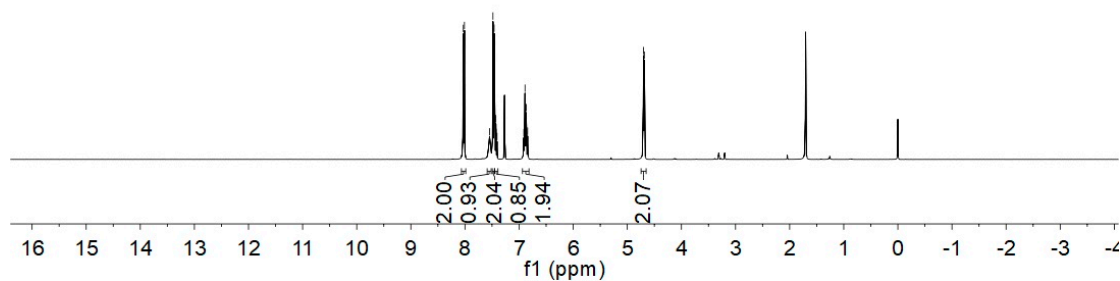<sup>1</sup>H NMR of compound F11

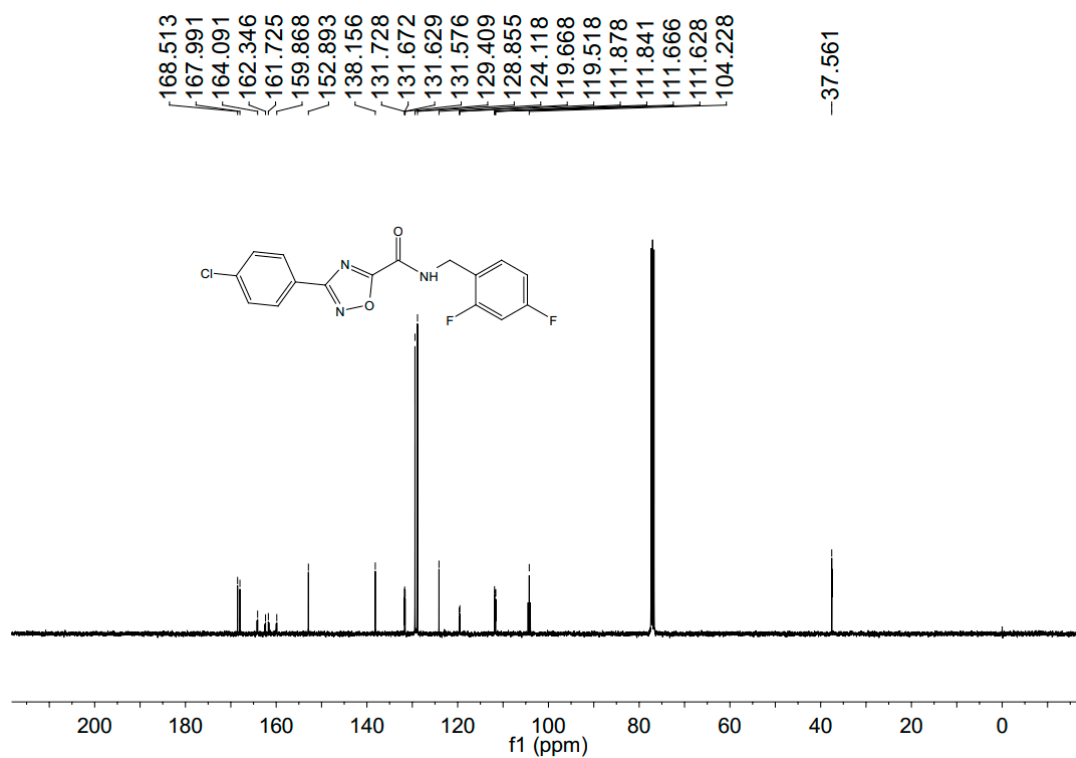

### <sup>13</sup>C NMR of compound F11

F11 #31 RT: 0.14 AV: 1 NL: 3.17E9  
T: FTMS + p ESI Full ms [100.0000-1500.0000]

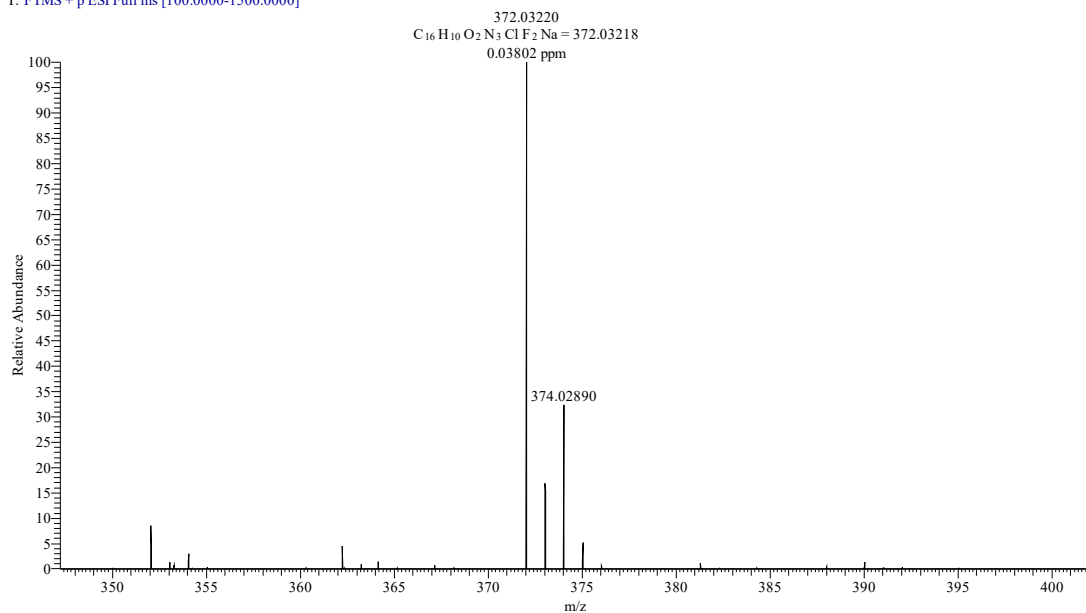

## HRMS of compound F11

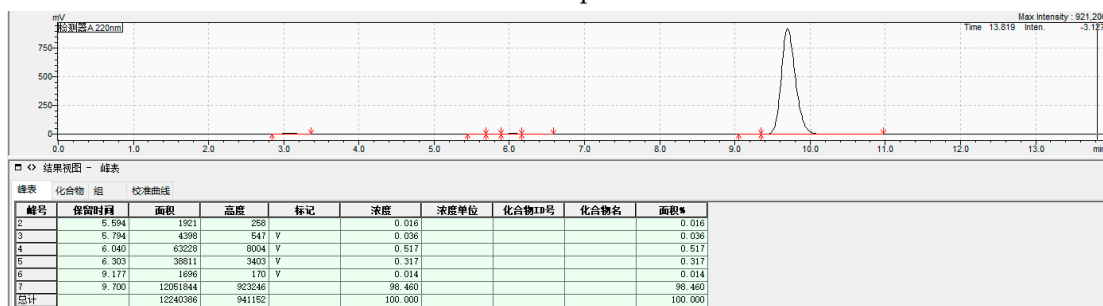

## HPLC of compound F12

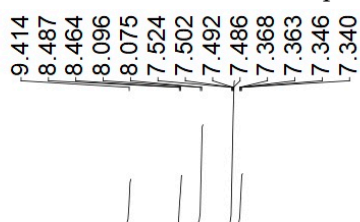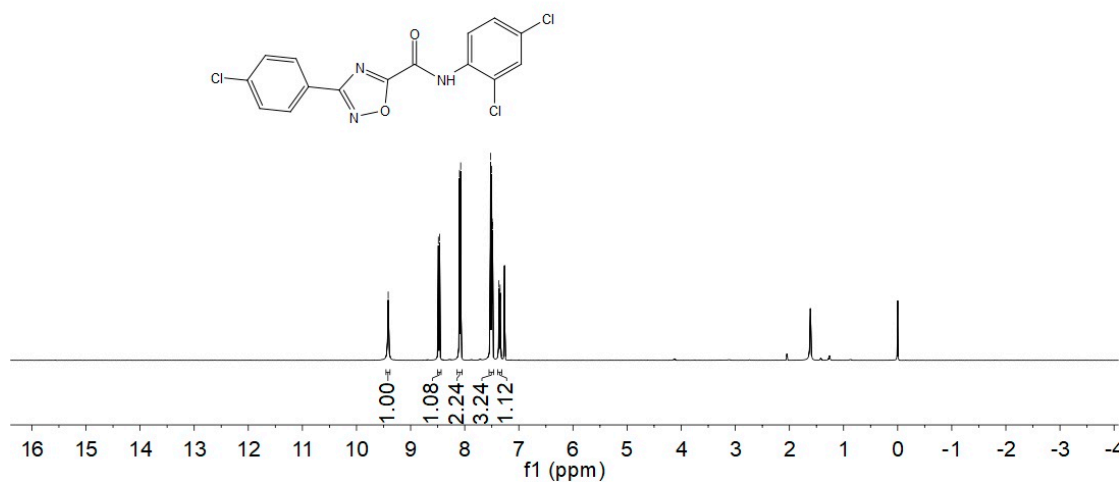<sup>1</sup>H NMR of compound F12

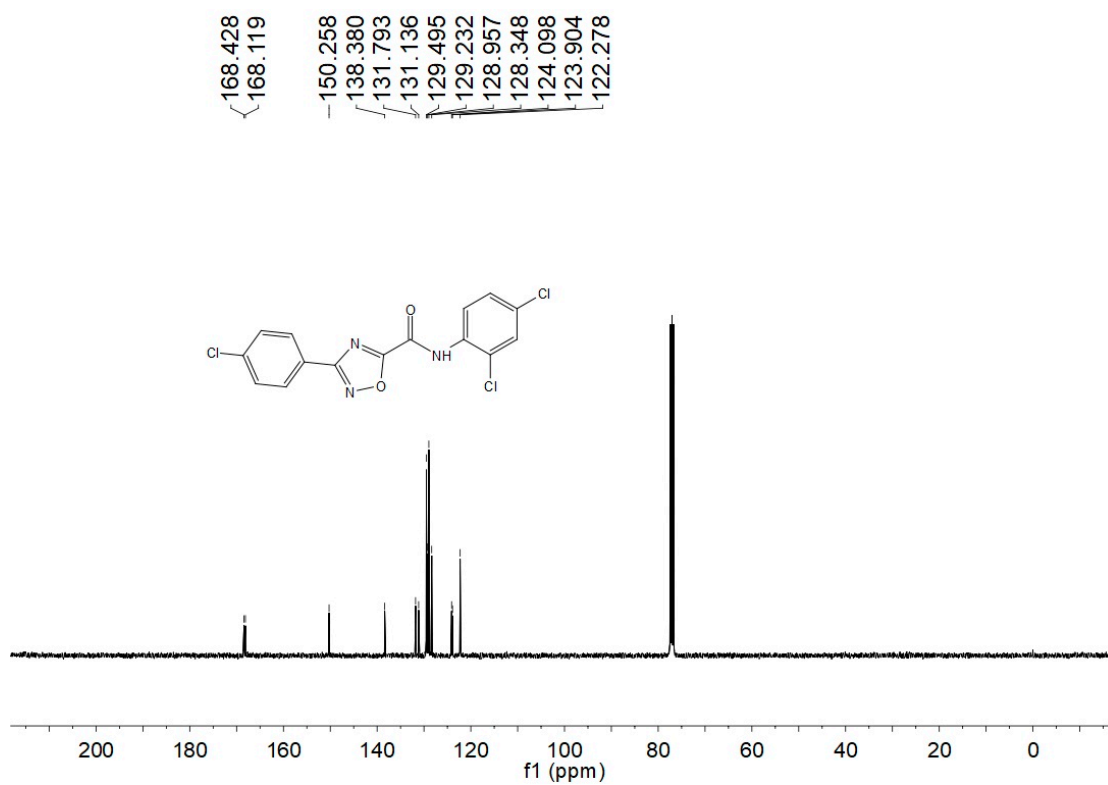 $^{13}\text{C}$  NMR of compound F12

F12\_211101154401 #28 RT: 0.13 AV: 1 NL: 2.87E9  
T: FTMS - p ESI Full ms [100.0000-1500.0000]

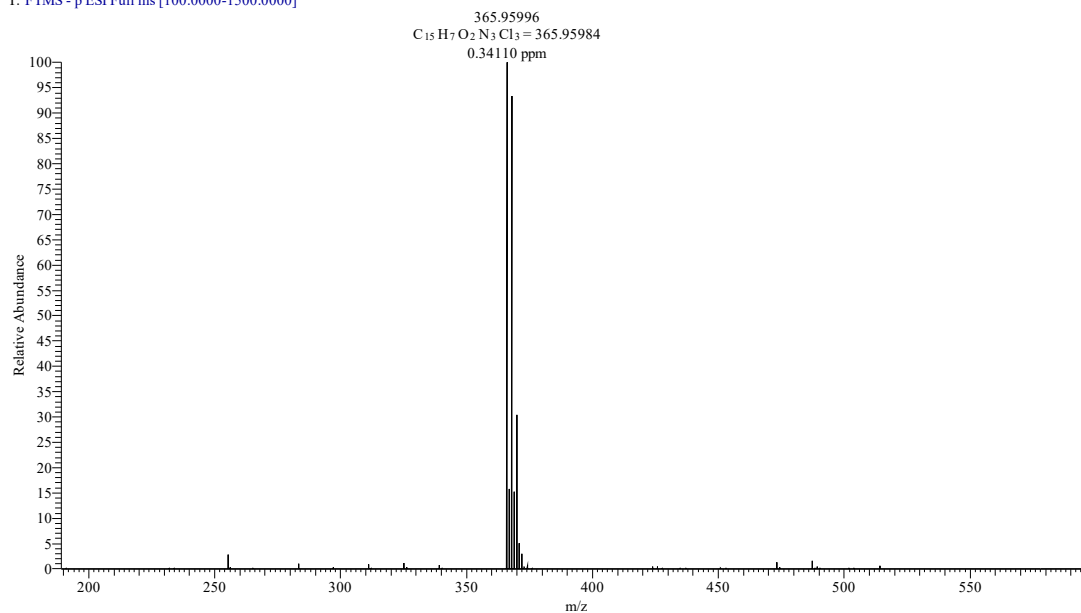



## HRMS of compound F12

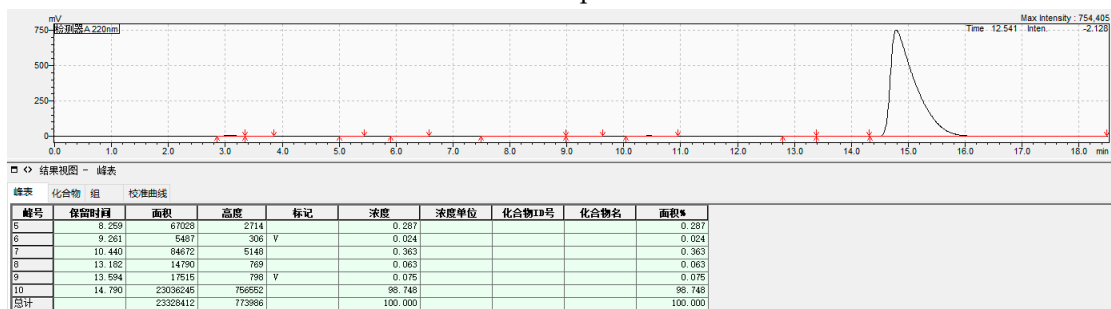

## HPLC of compound F13

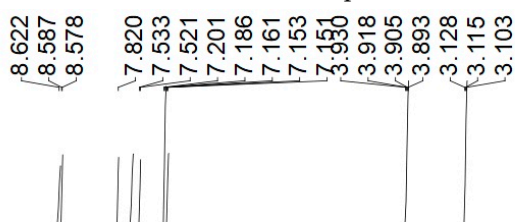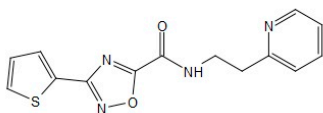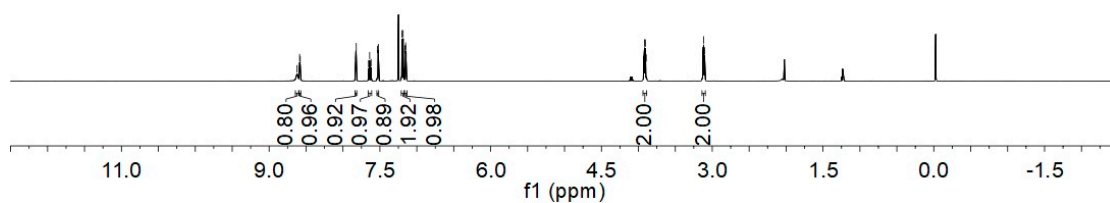<sup>1</sup>H NMR of compound F13

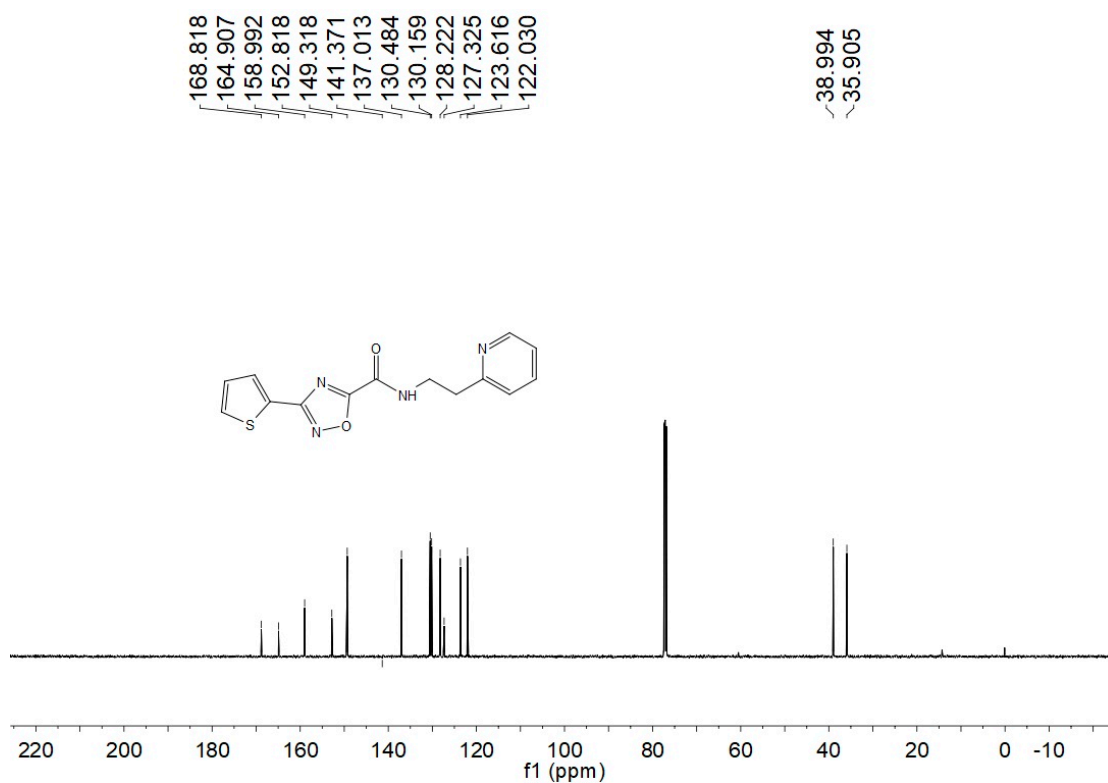<sup>13</sup>C NMR of compound F13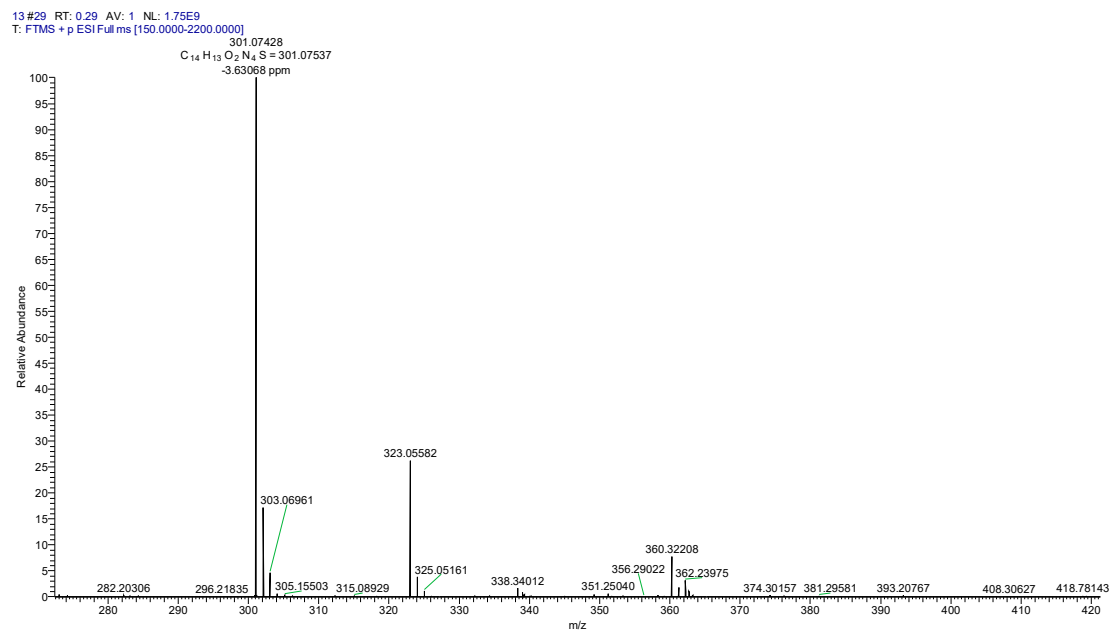

## HRMS of compound F13

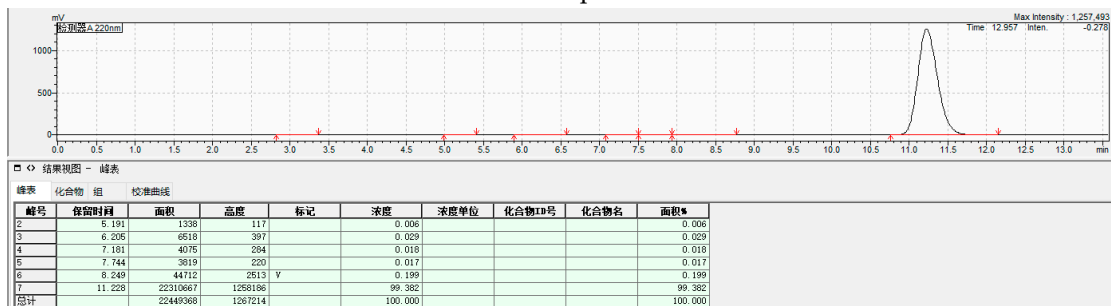

## HPLC of compound F14

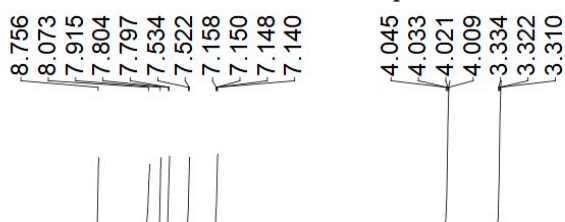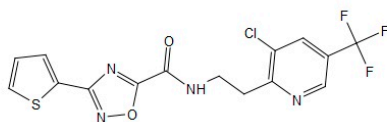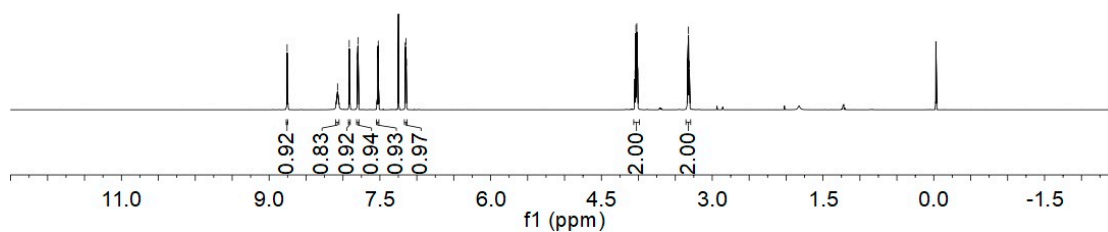<sup>1</sup>H NMR of compound F14

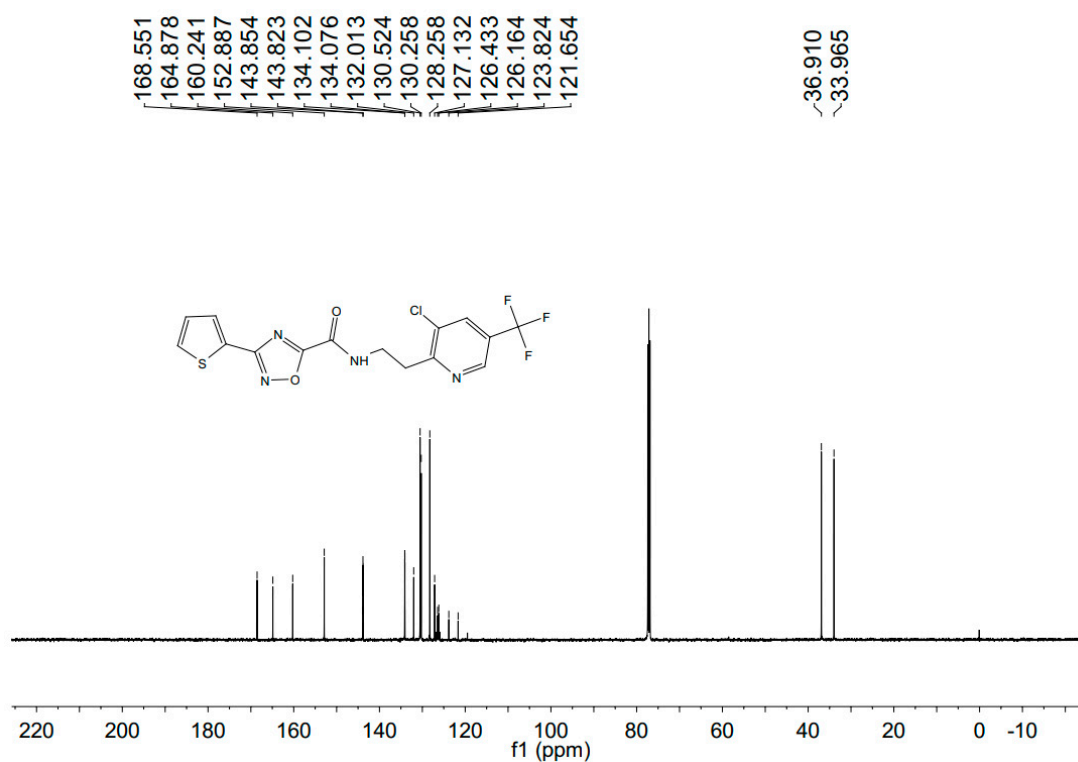<sup>13</sup>C NMR of compound F14

14 #35 RT: 0.35 AV: 1 NL: 2.68E8  
T: FTMS + p ESI Full ms [150.0000-2200.0000]

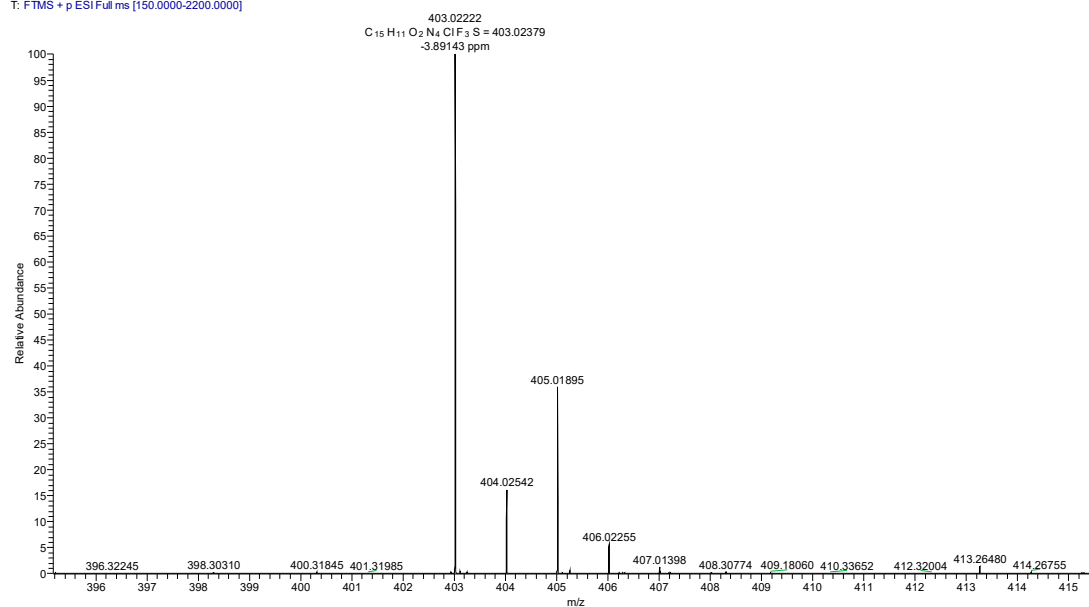

HRMS of compound

F14

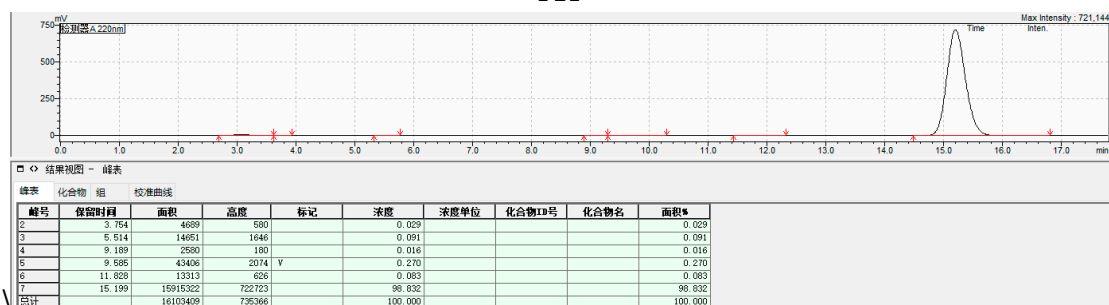

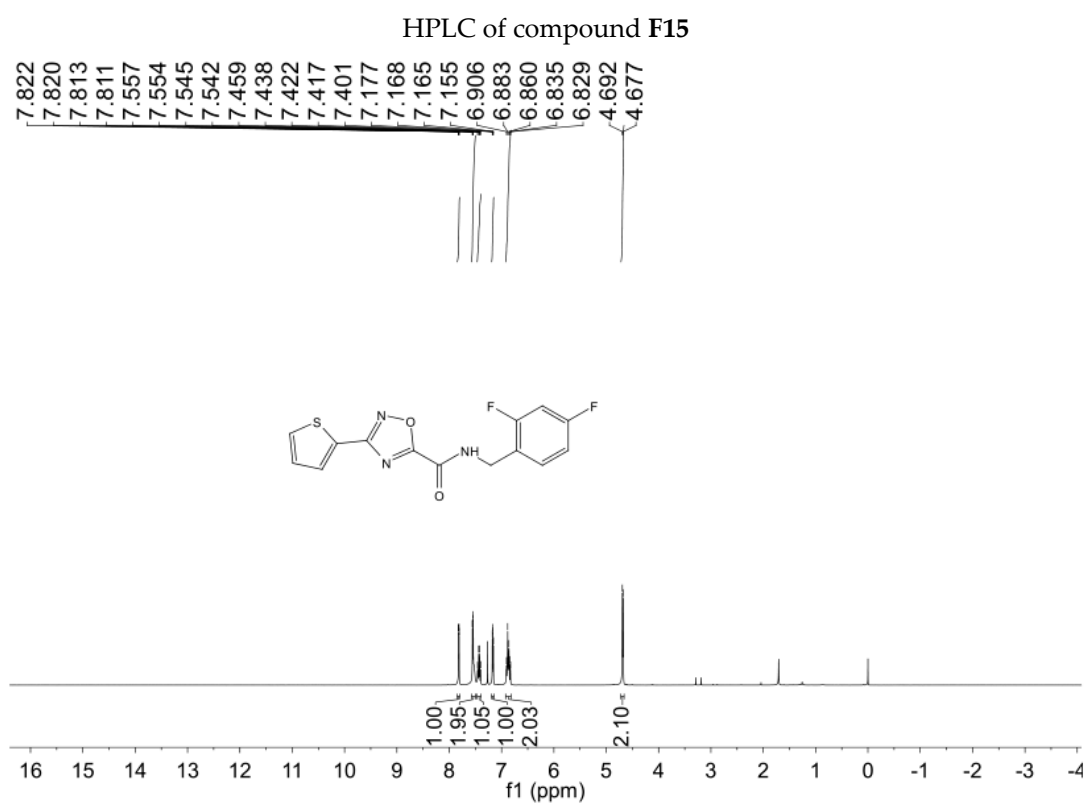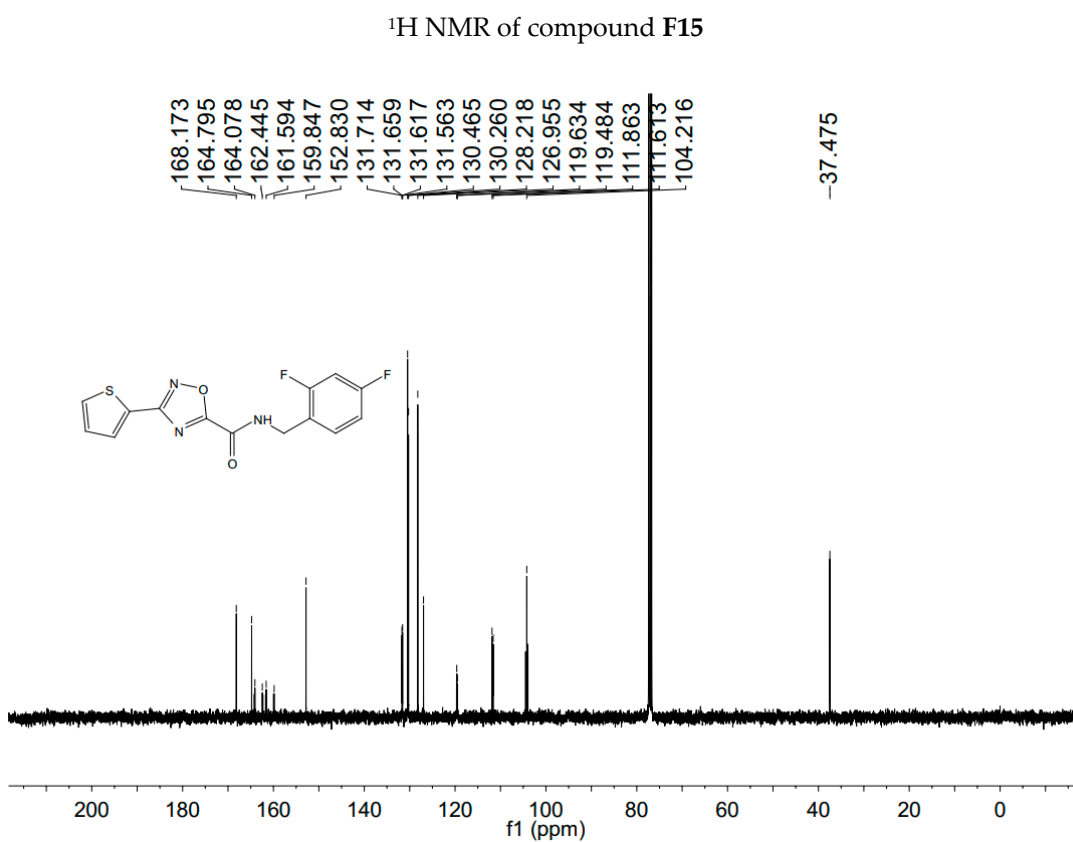

<sup>13</sup>C NMR of compound F15

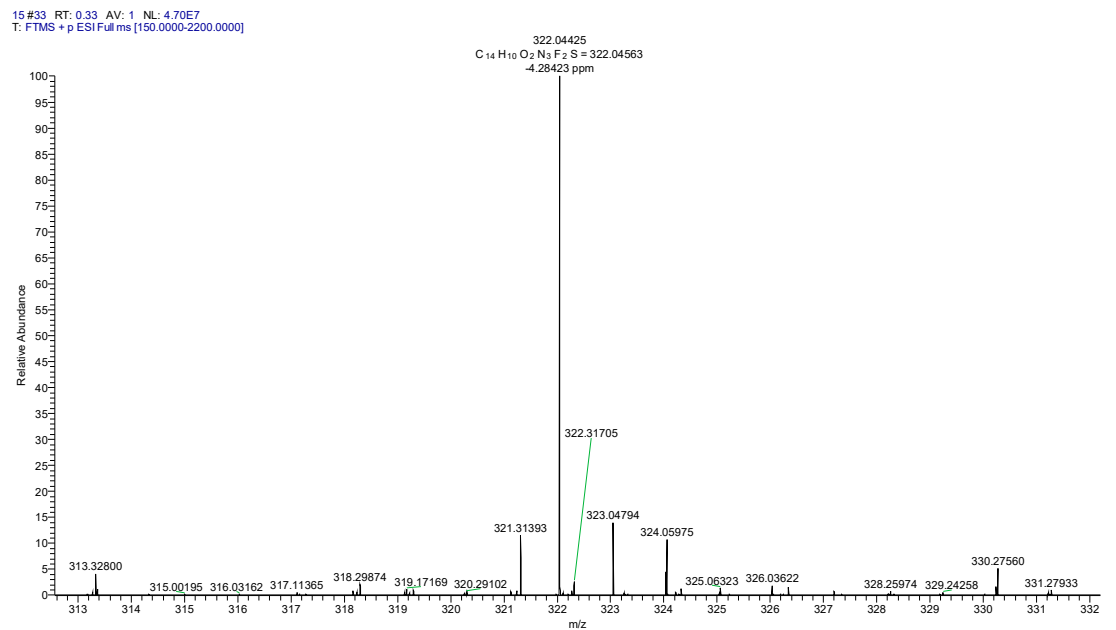

HRMS of compound F15

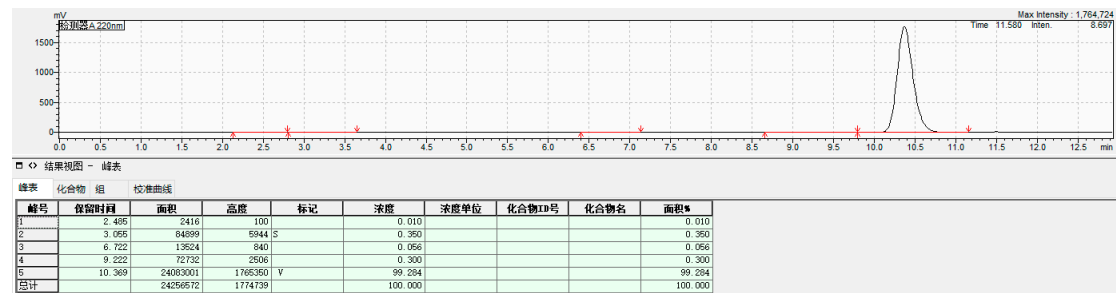

HPLC of compound F16

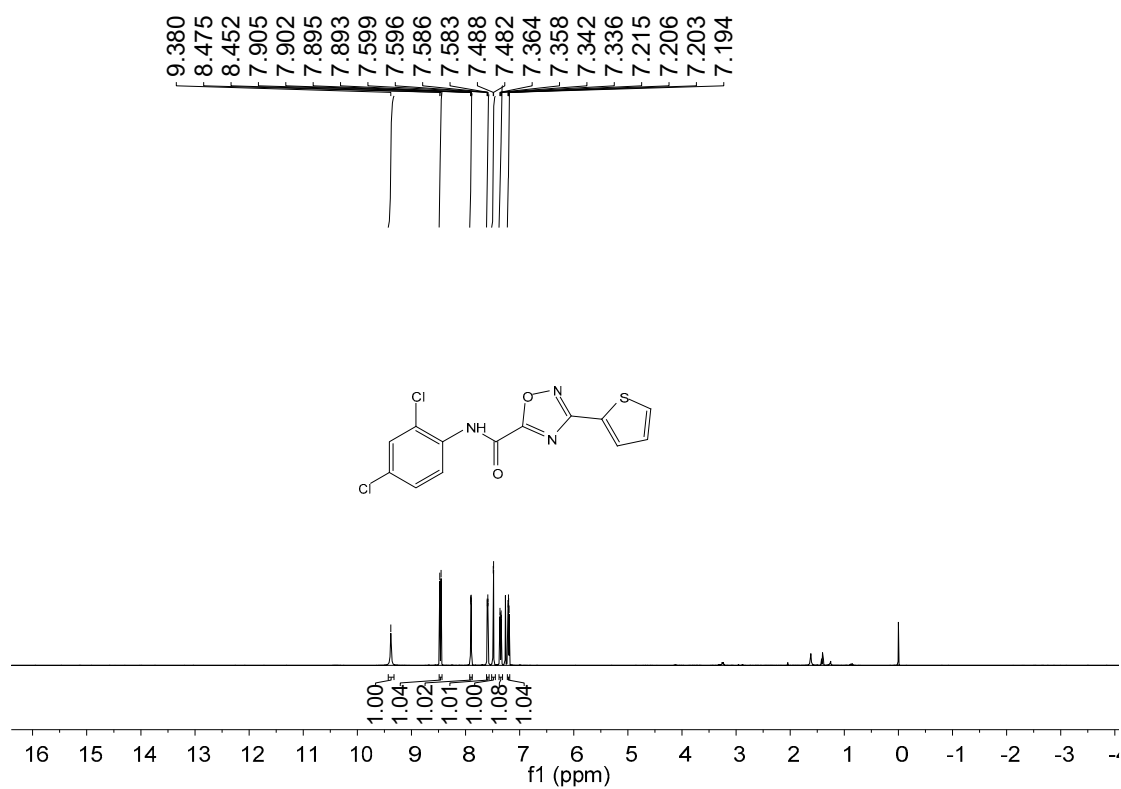<sup>1</sup>H NMR of compound F16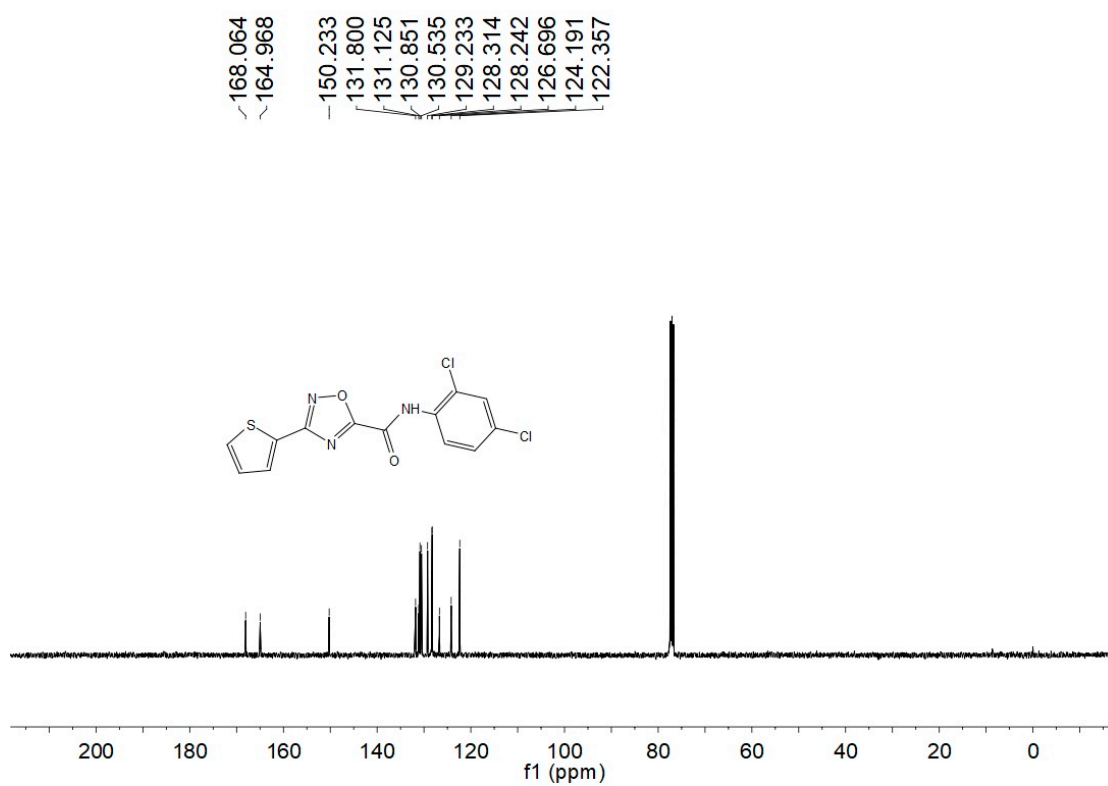

<sup>13</sup>C NMR of compound F16

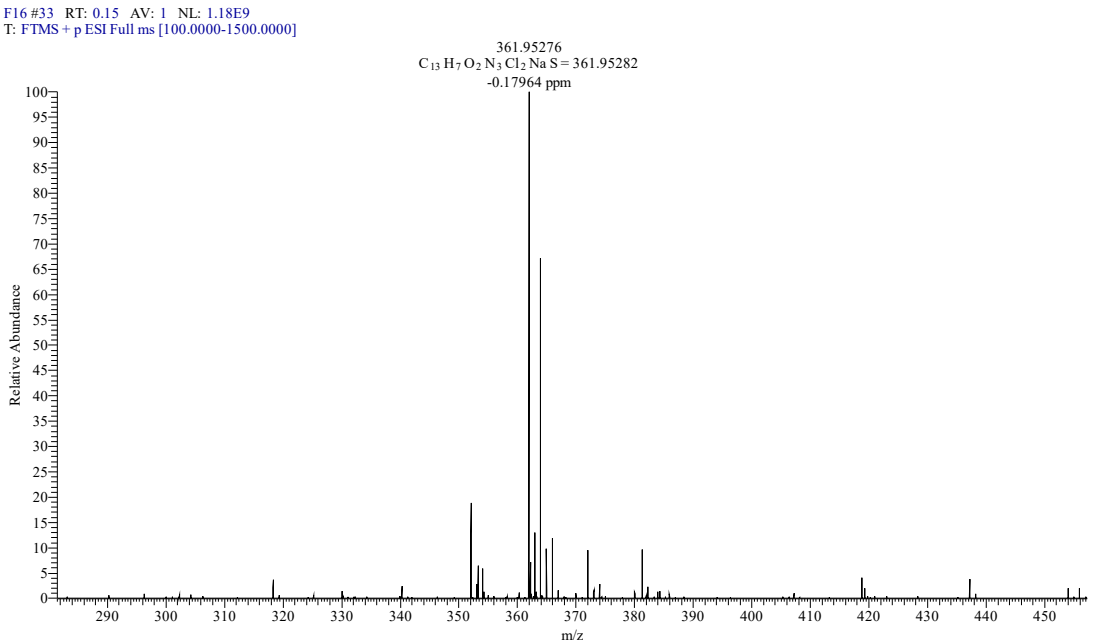

HRMS of compound F16

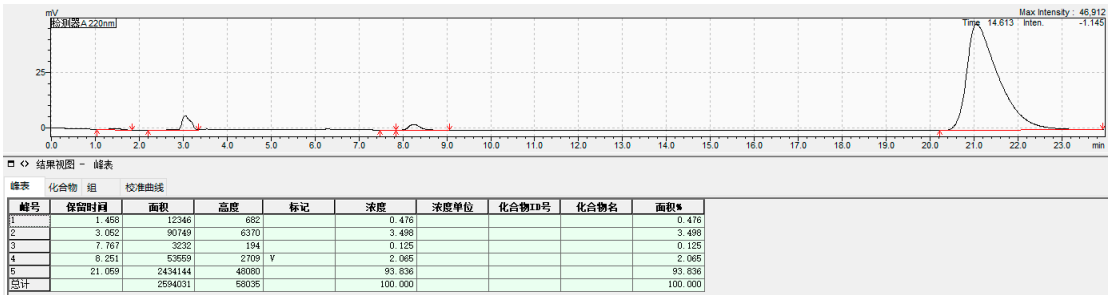

HPLC of compound F17



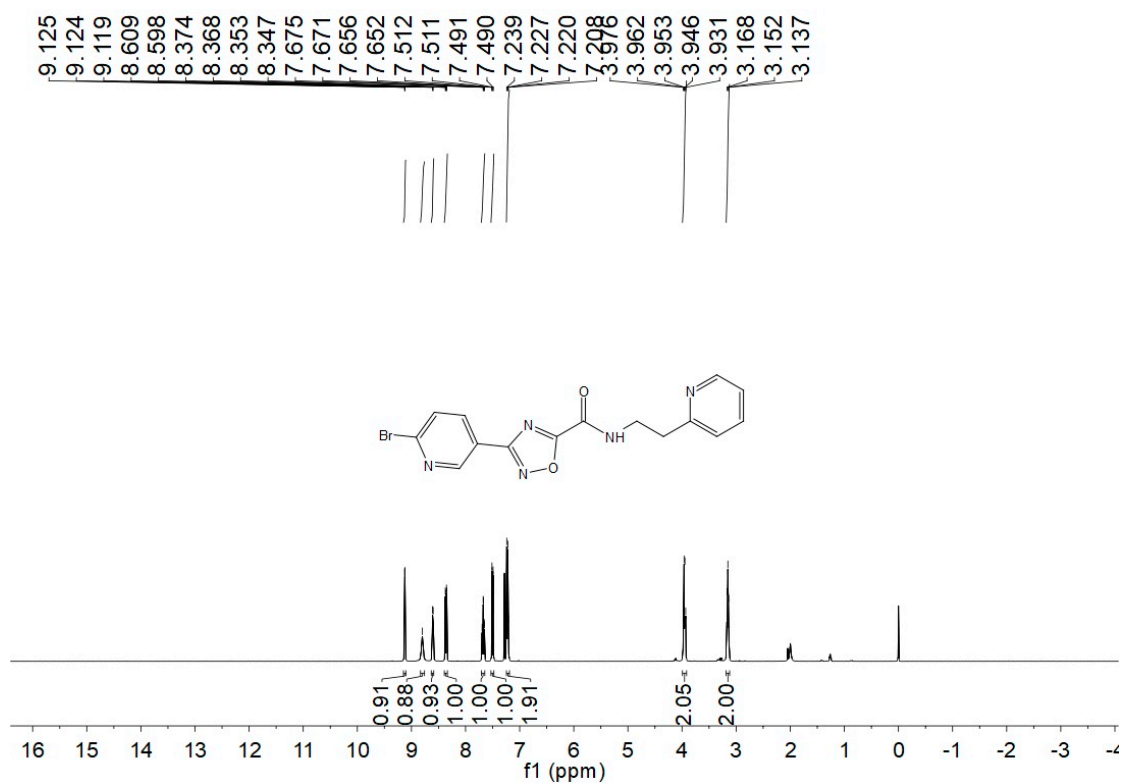<sup>1</sup>H NMR of compound F17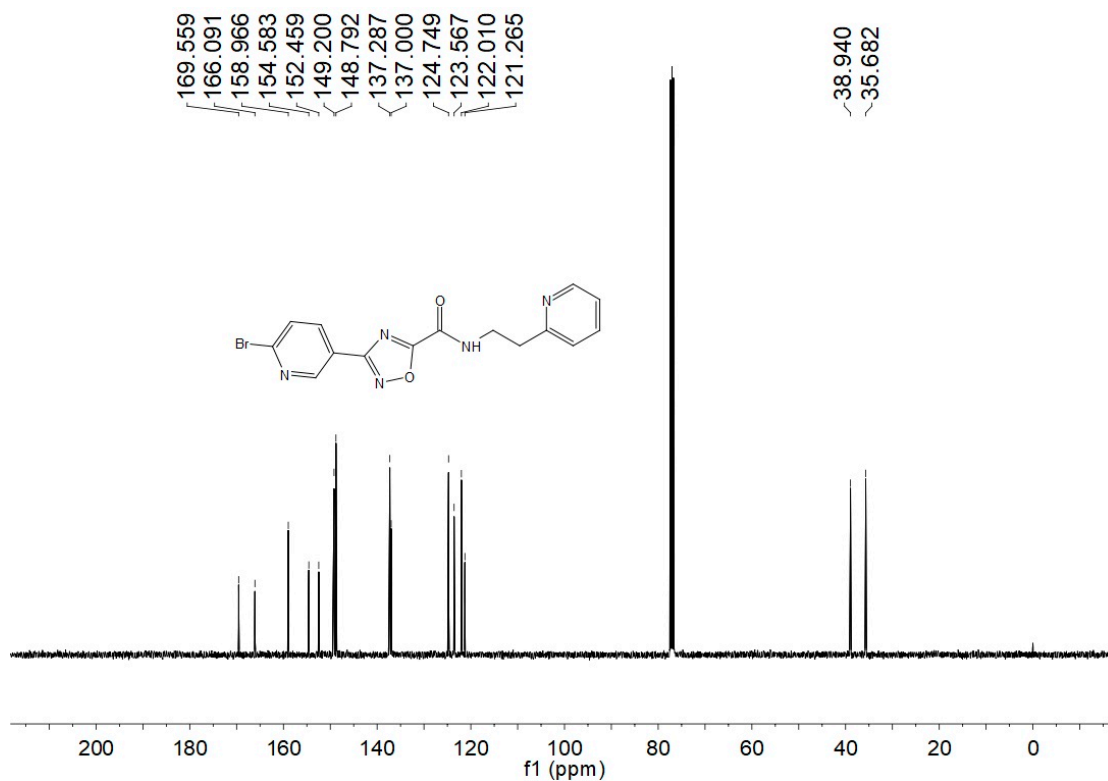

<sup>13</sup>C NMR of compound F17

F17 211101154744 #32 RT: 0.14 AV: 1 NL: 1.18E7  
T: FTMS - p ESI Full ms [100.0000-1500.0000]

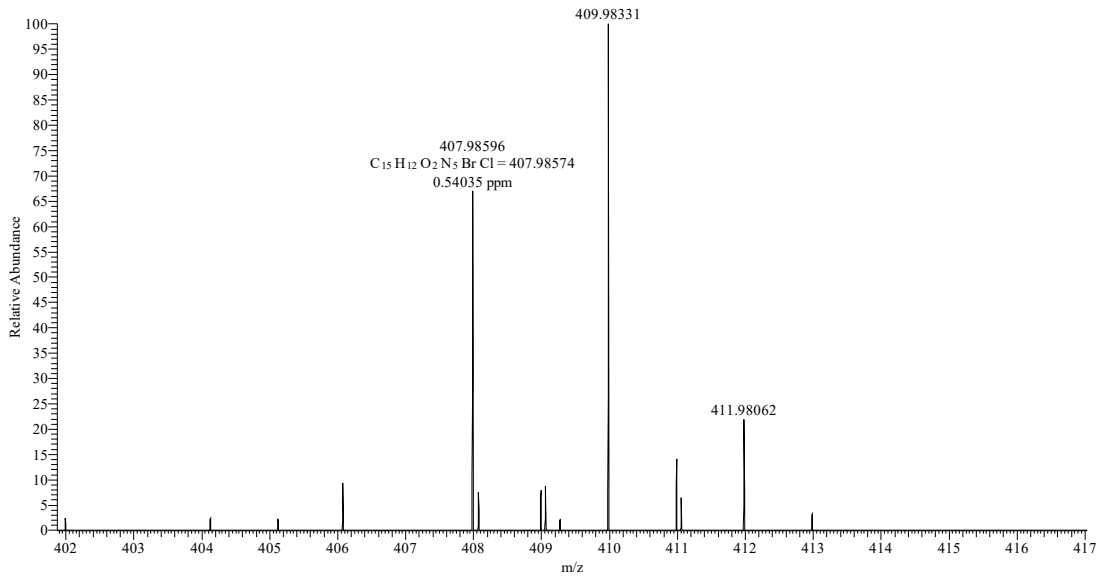

HRMS of compound F17

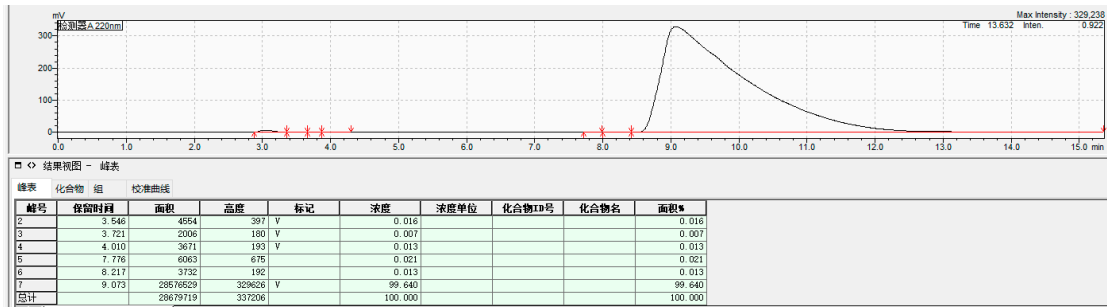

HPLC of compound F18

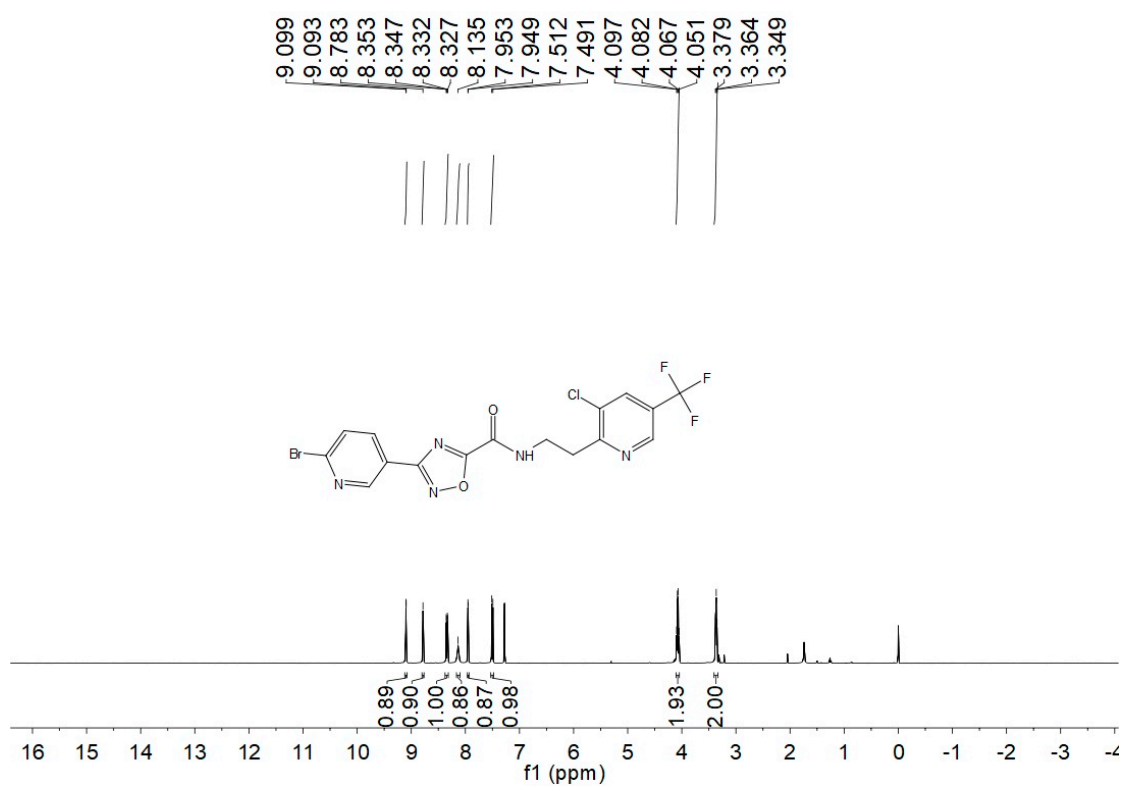<sup>1</sup>H NMR of compound F18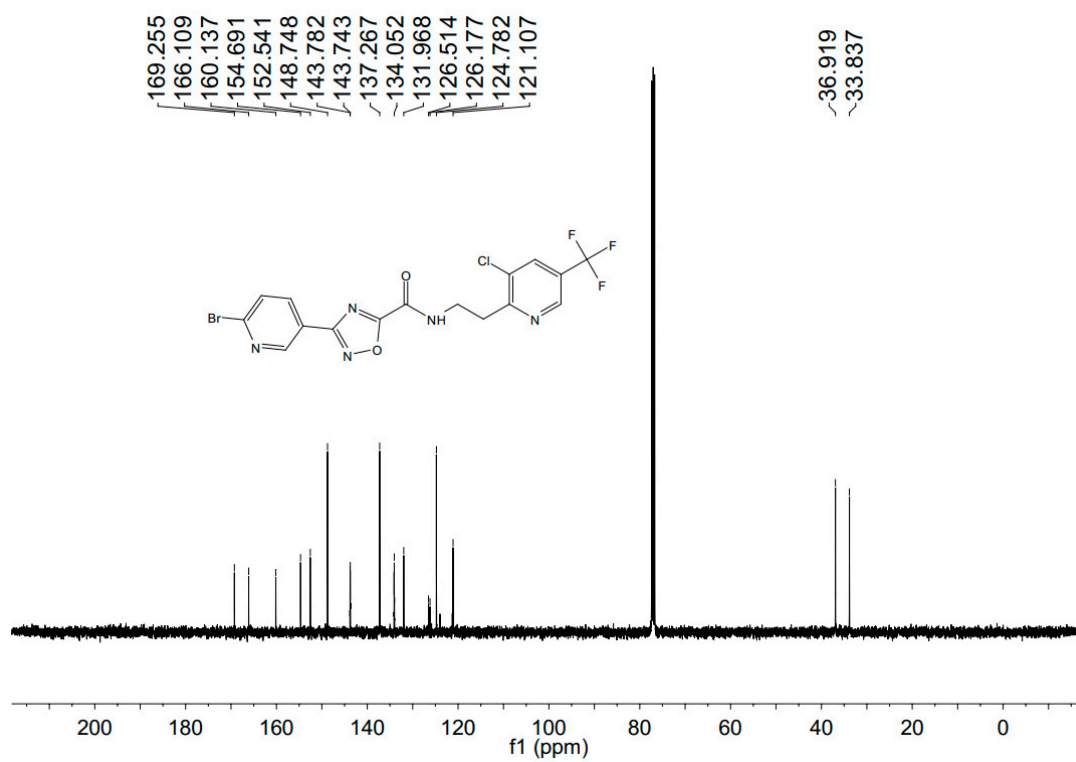

**$^{13}\text{C}$  NMR of compound F18**

F18 211101155513 #28 RT: 0.13 AV: 1 NL: 5.75E7  
T: FTMS - p ESI Full ms [100.0000-1500.0000]

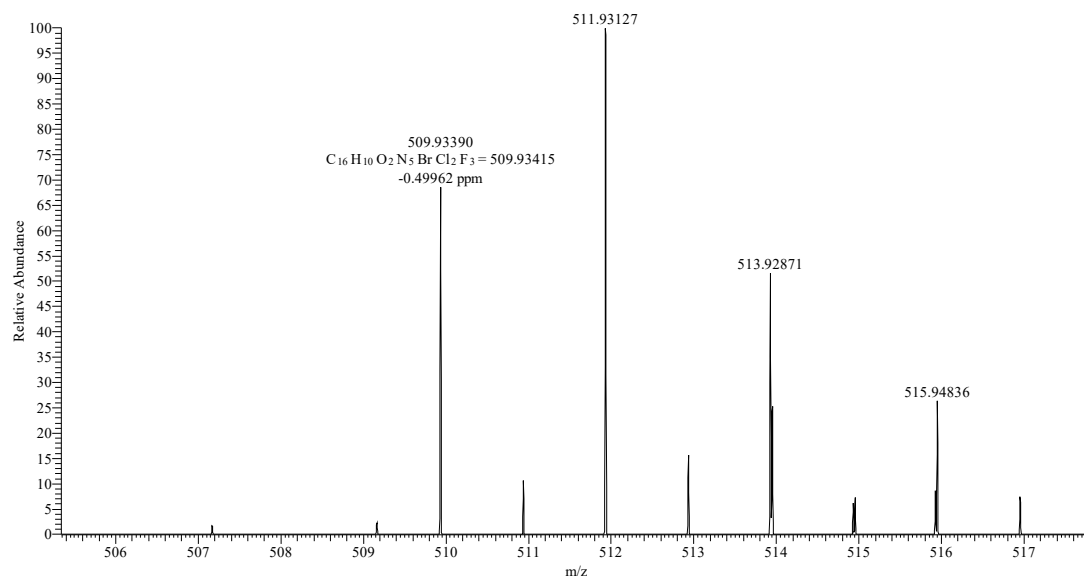**HRMS of compound F18**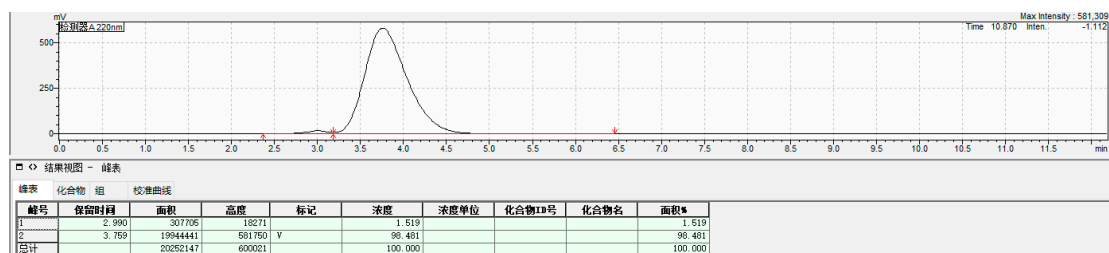**HPLC of compound F19**

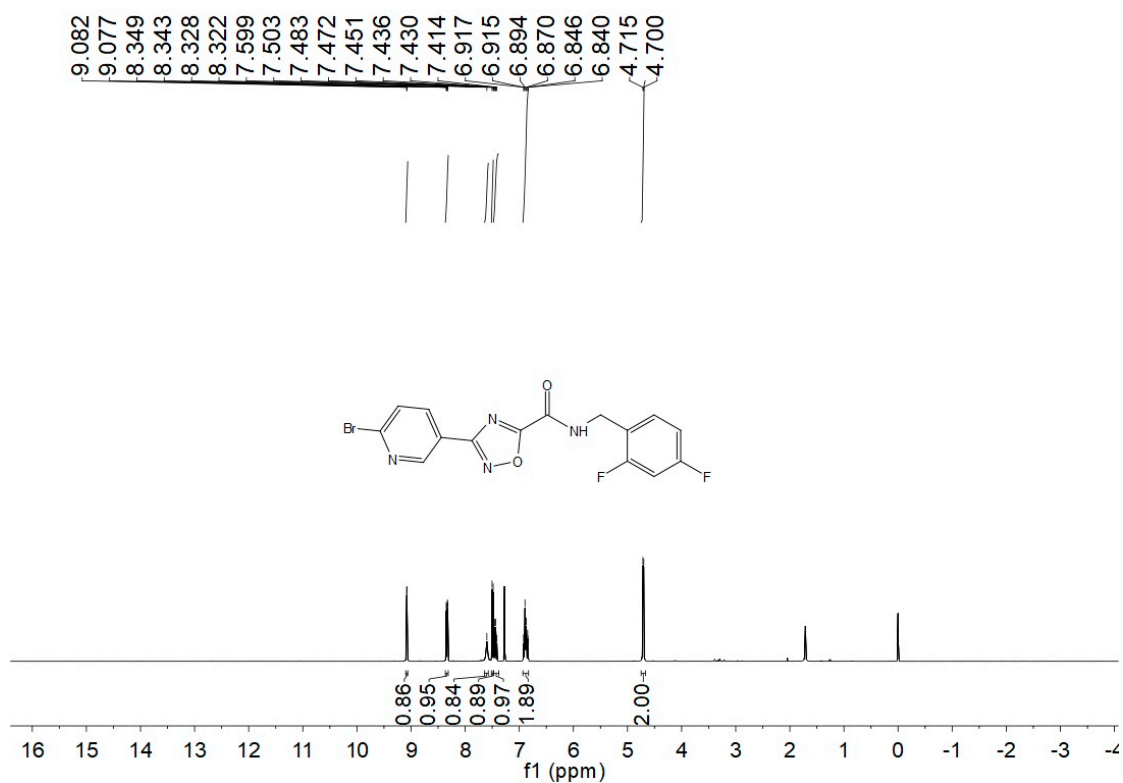<sup>1</sup>H NMR of compound **F19**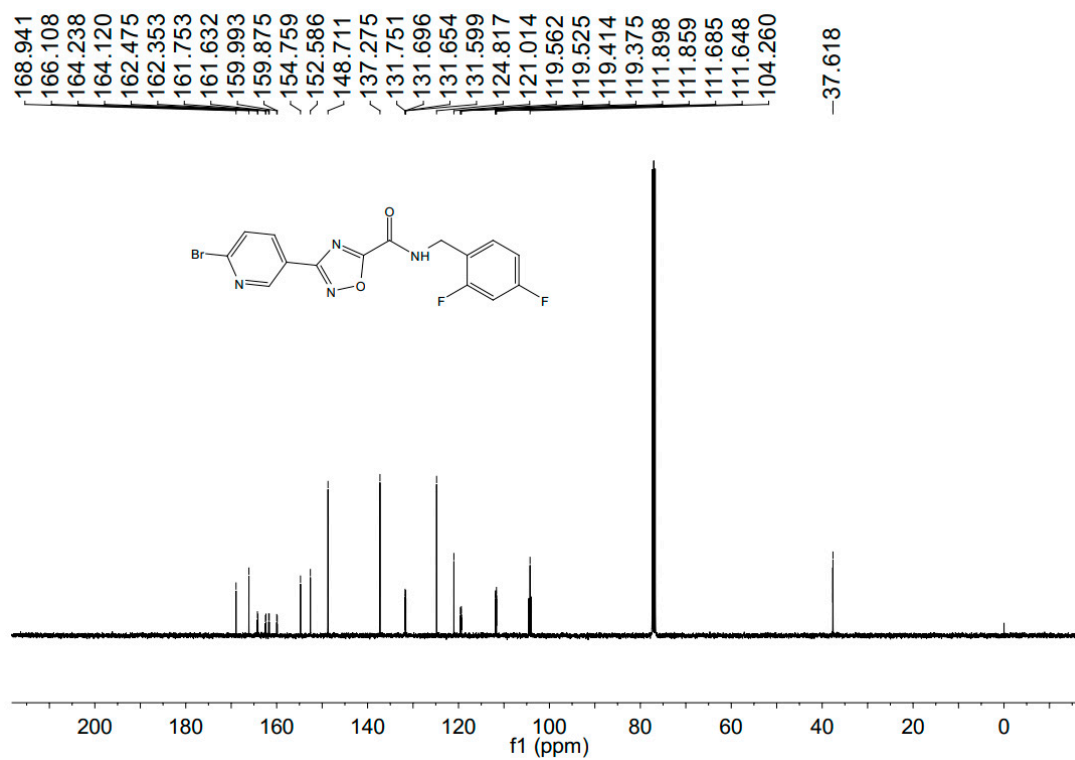

<sup>13</sup>C NMR of compound F19

F19 211101155358 #31 RT: 0.14 AV: 1 NL: 2.68E7  
T: FTMS - p ESI Full ms [100.0000-1500.0000]

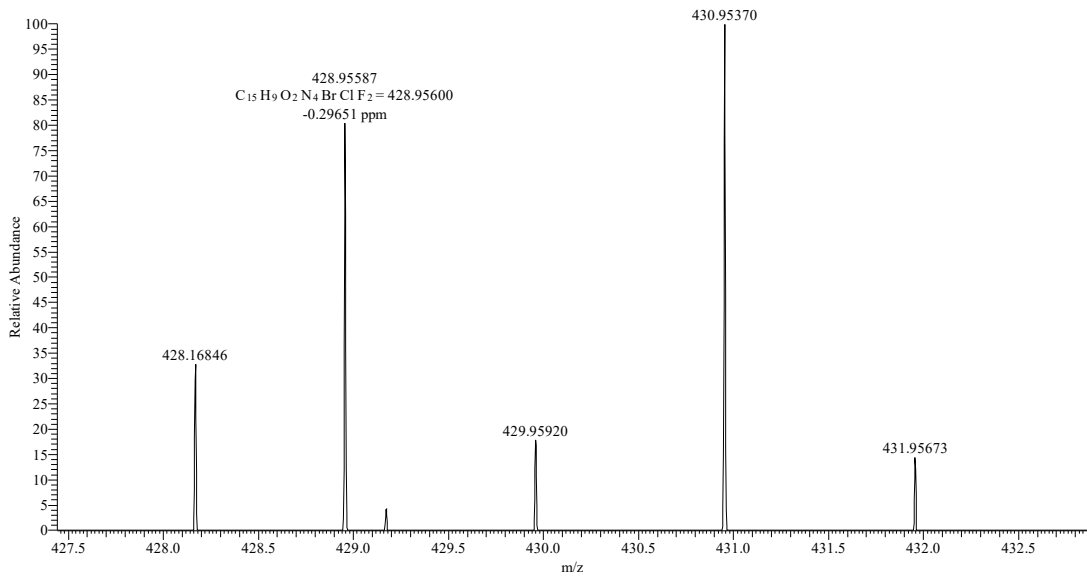

HRMS of compound F19

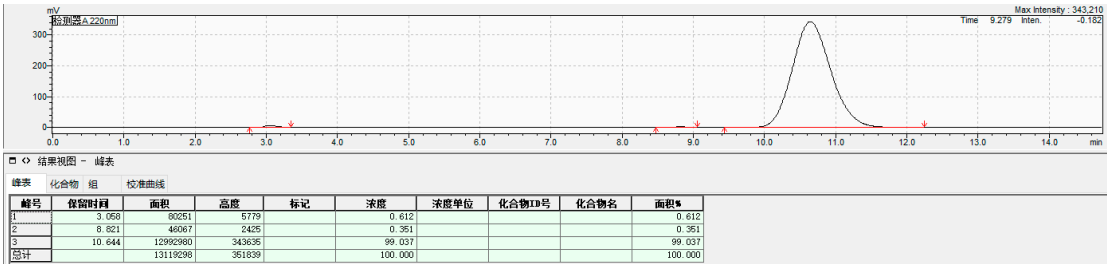

HPLC of compound F20

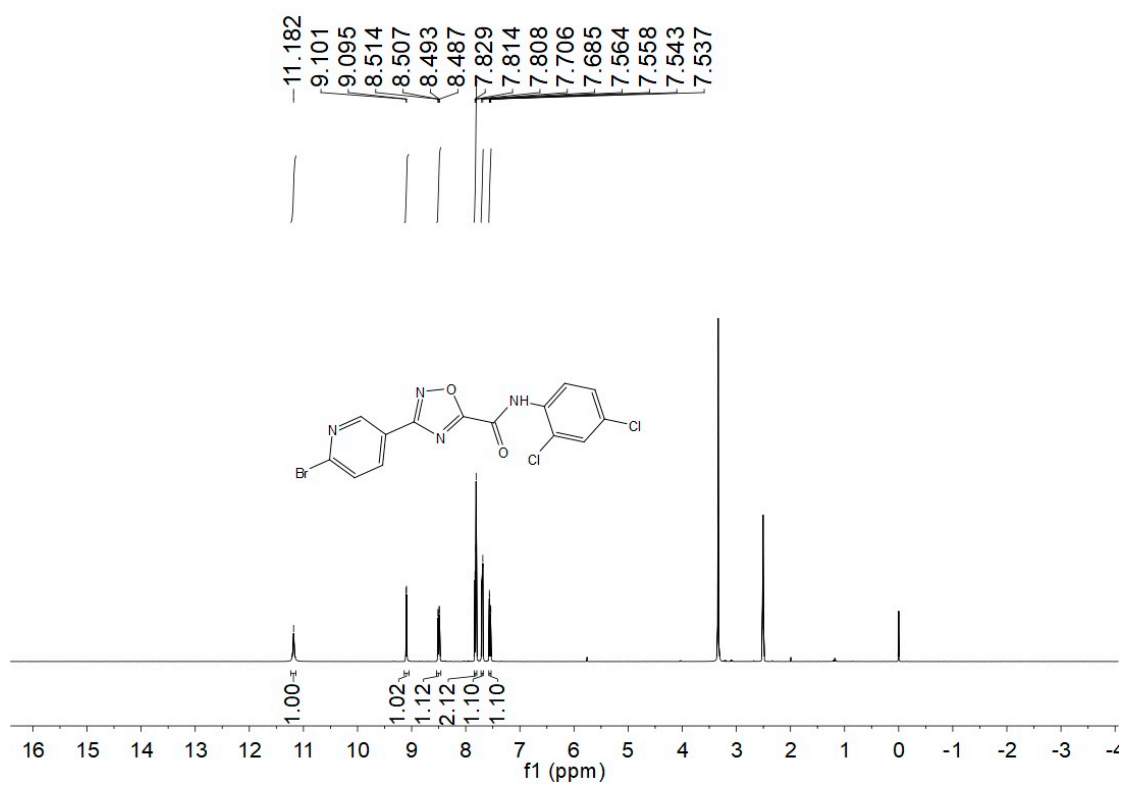<sup>1</sup>H NMR of compound F20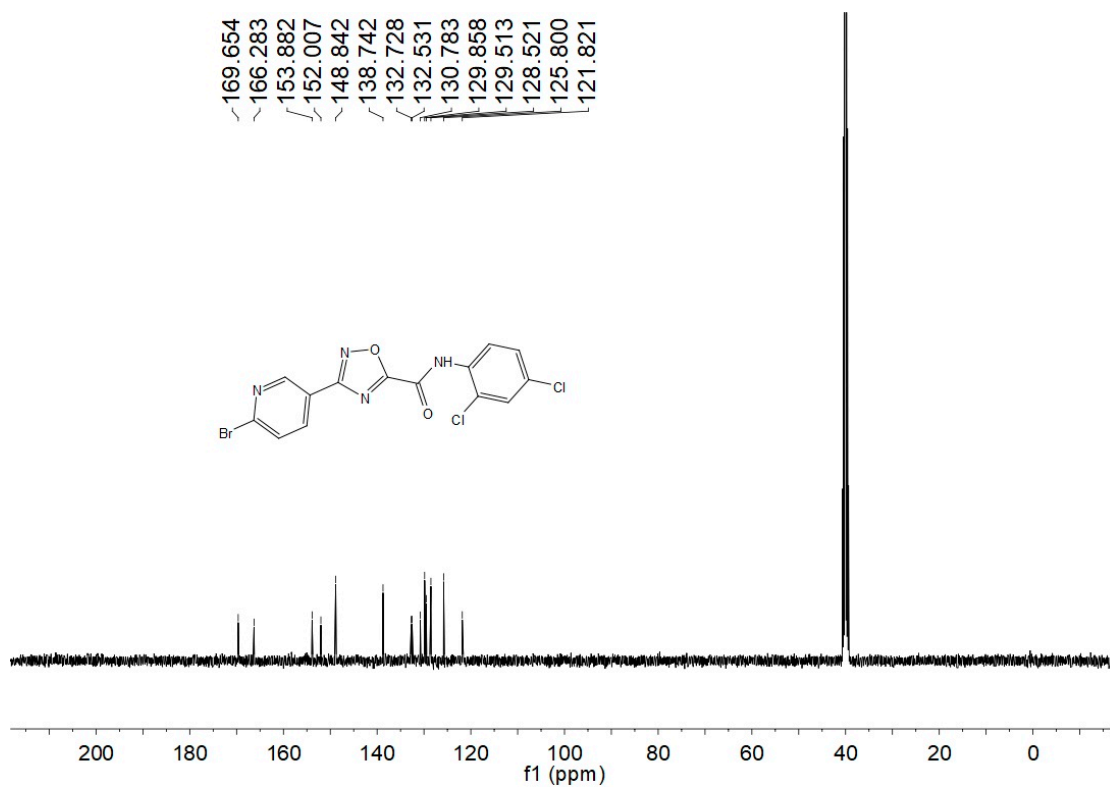

<sup>13</sup>C NMR of compound F20

F20 211101154901 #29 RT: 0.13 AV: 1 NL: 2.91E7  
T: FTMS - p ESI Full ms [100.0000-1500.0000]

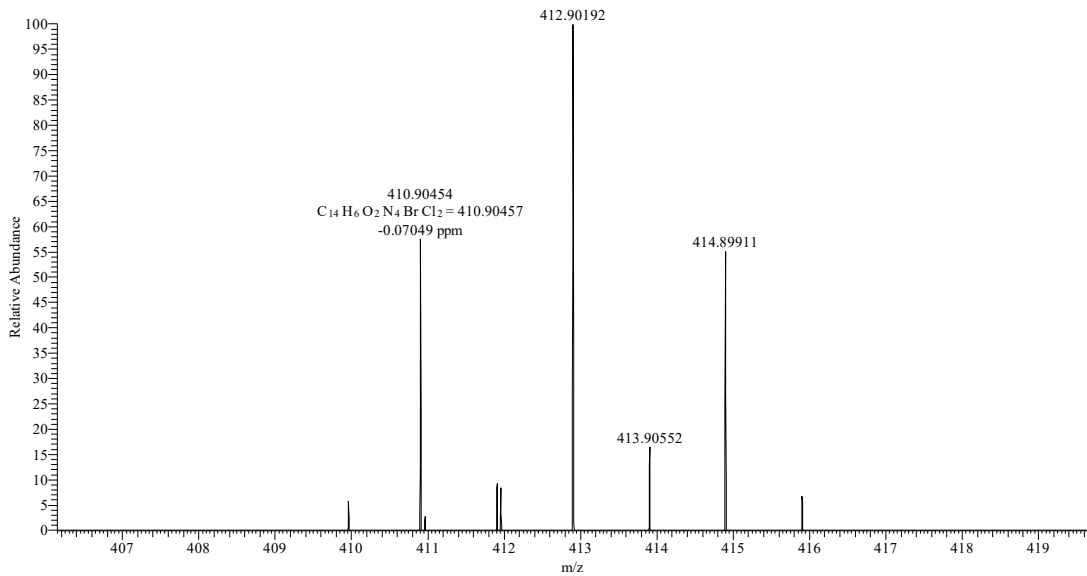

HRMS of compound F20

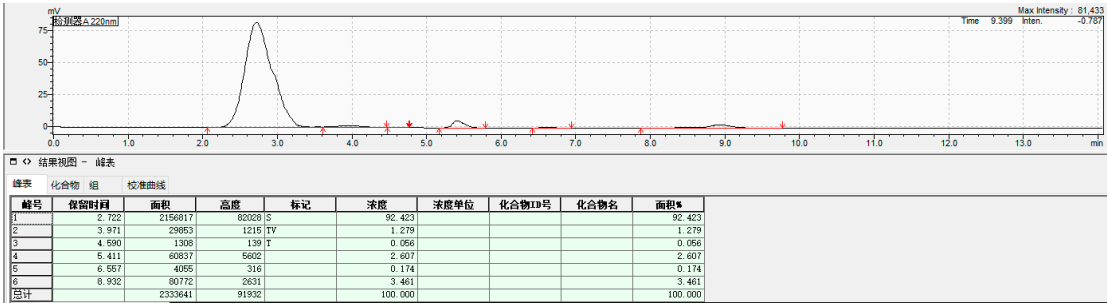

HPLC of compound F21



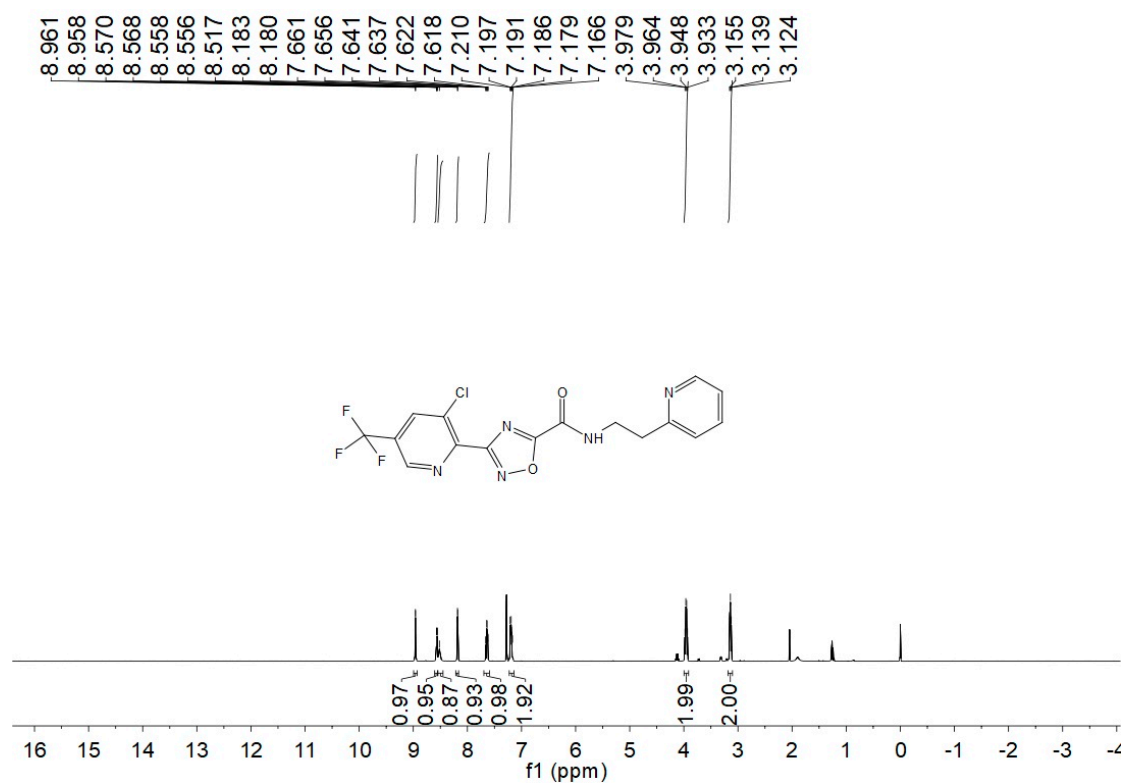<sup>1</sup>H NMR of compound F21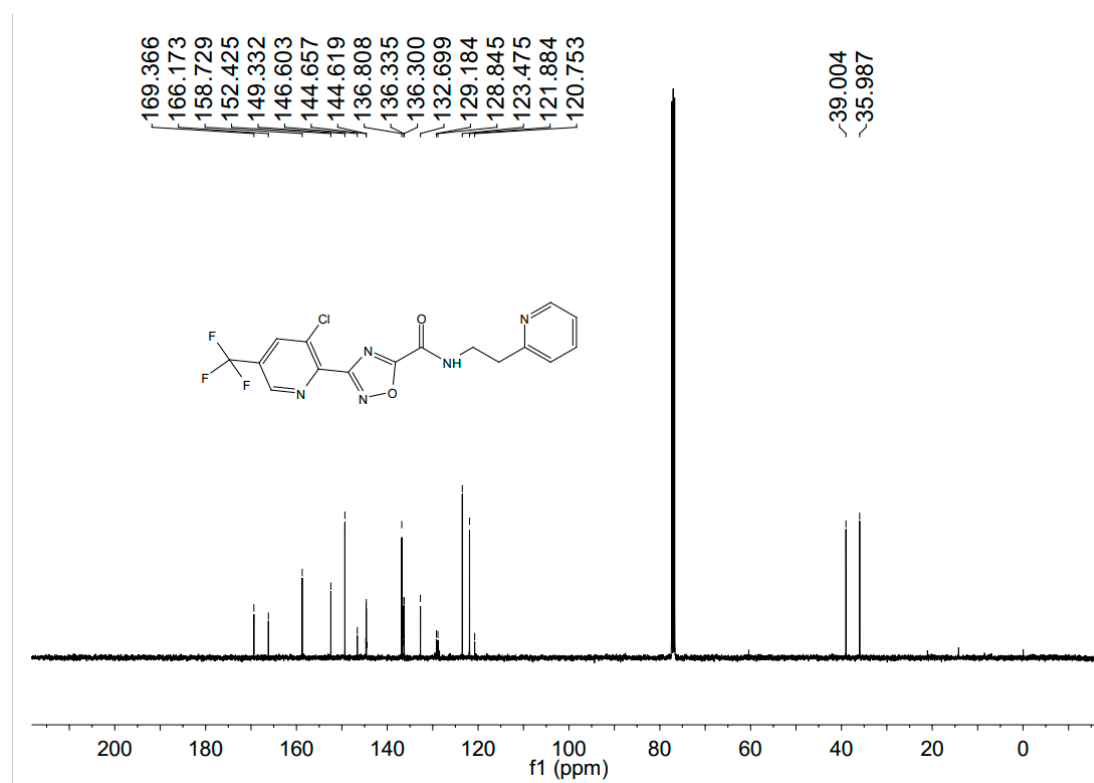

<sup>13</sup>C NMR of compound F21

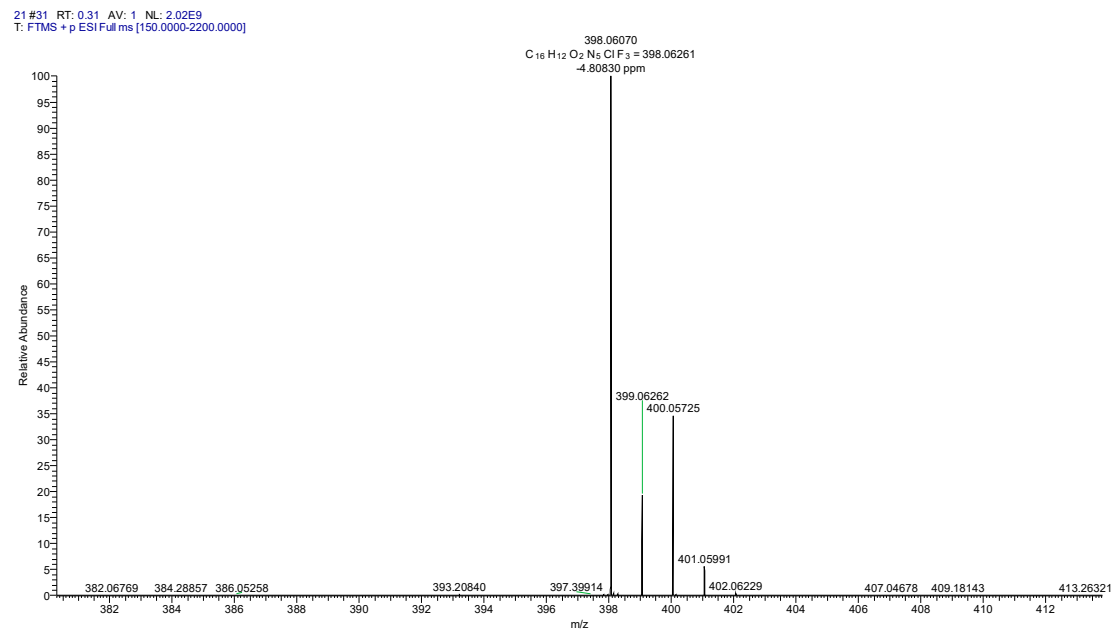

HRMS of compound F21

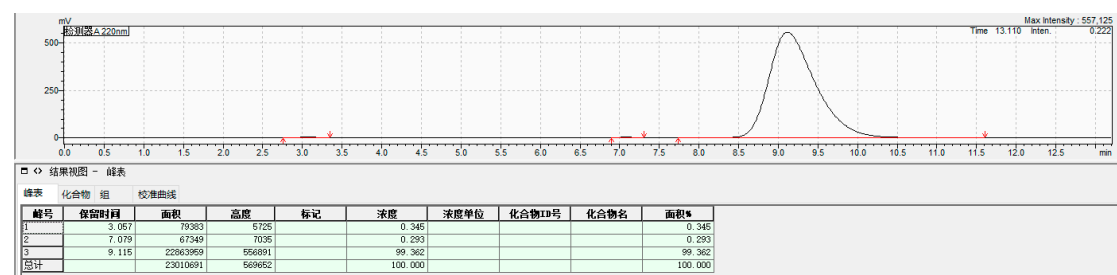

HPLC of compound F22

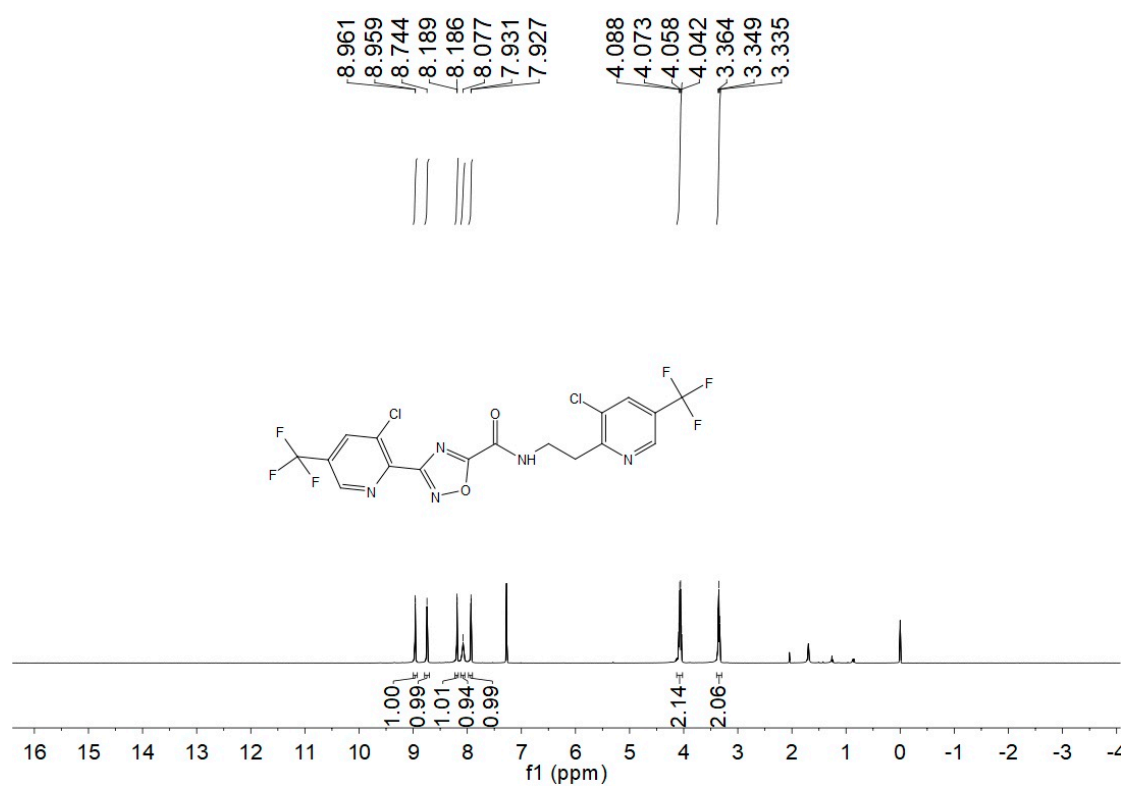<sup>1</sup>H NMR of compound F22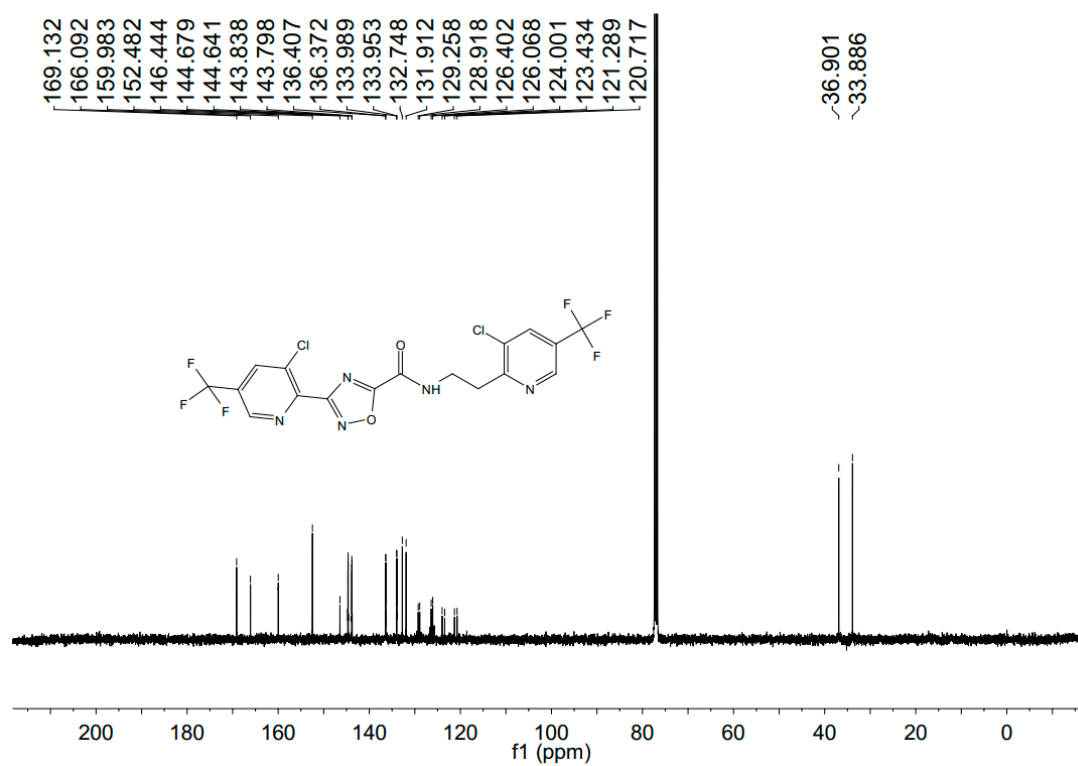

<sup>13</sup>C NMR of compound F22

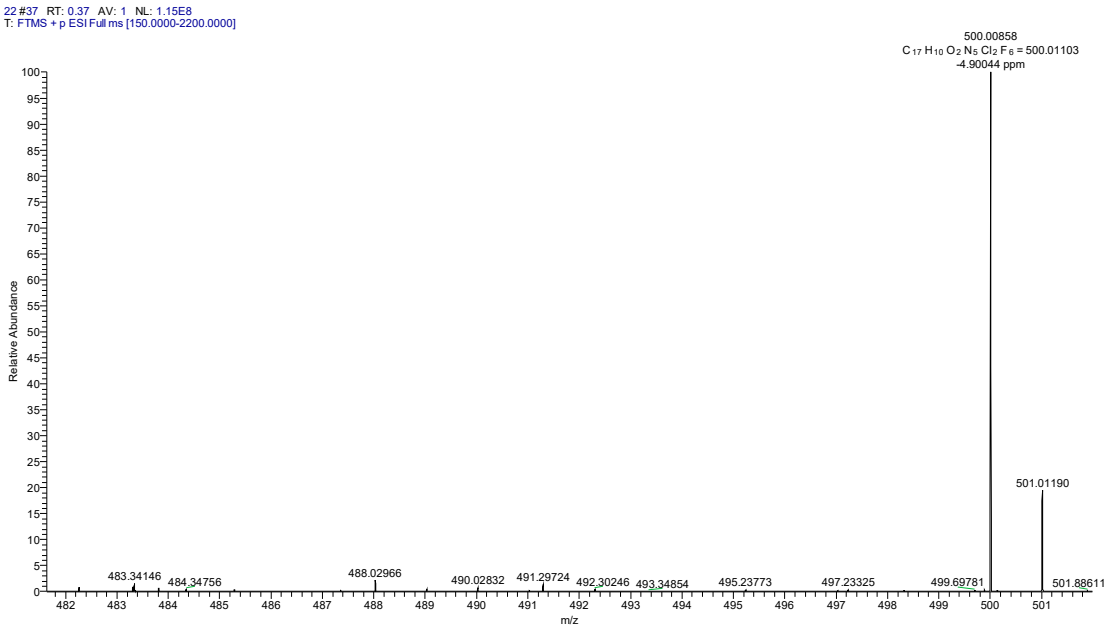

HRMS of compound F22

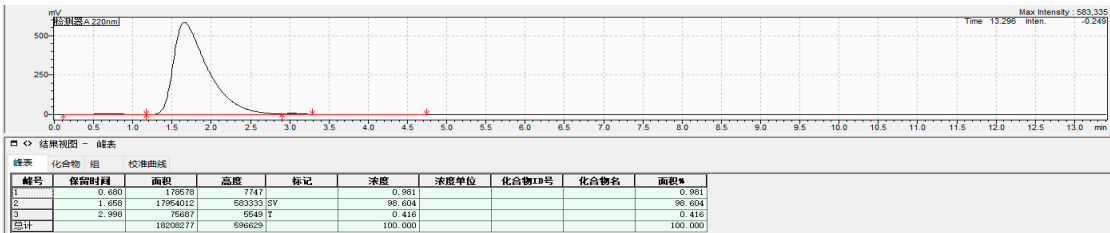

HPLC of compound F23

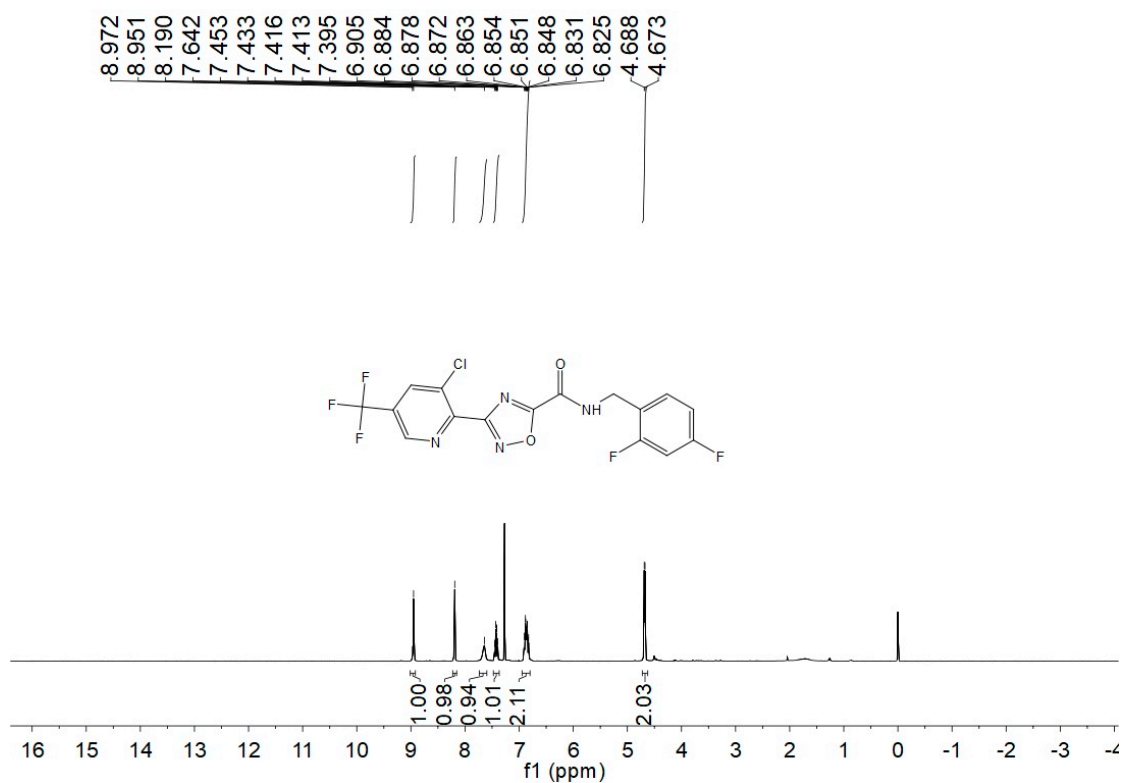<sup>1</sup>H NMR of compound F23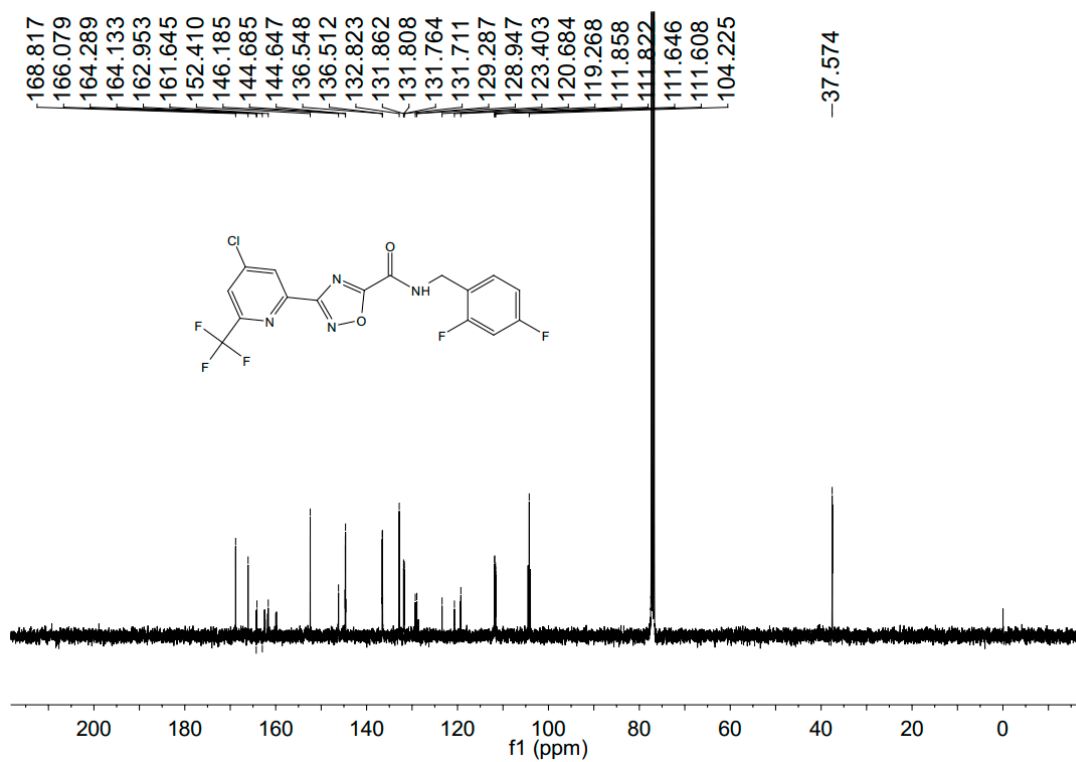

<sup>13</sup>C NMR of compound F23

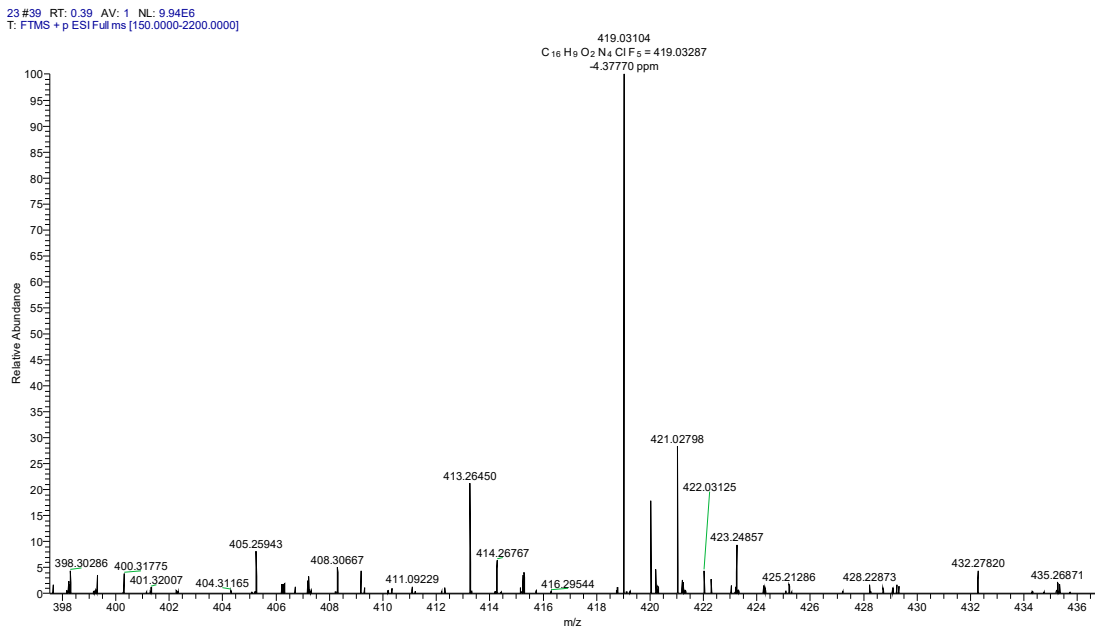

HRMS of compound F23

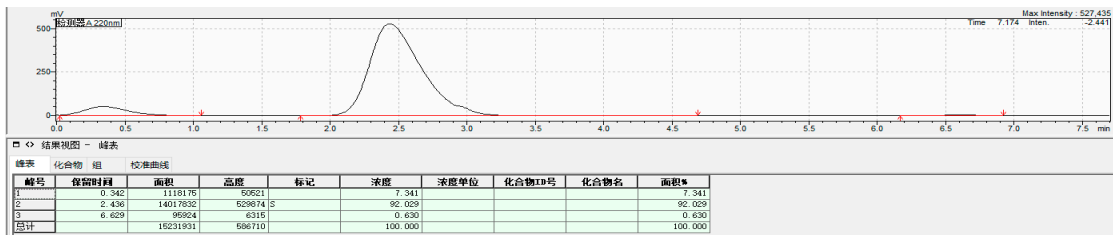

HPLC of compound F24

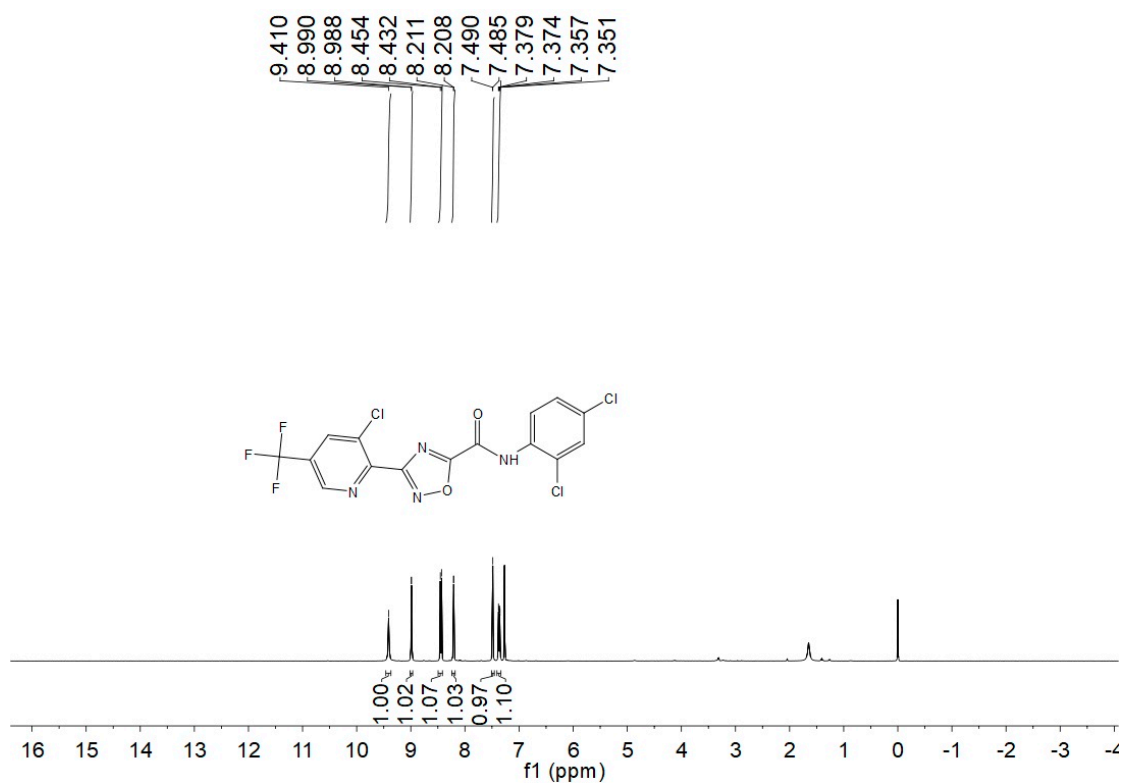<sup>1</sup>H NMR of compound F24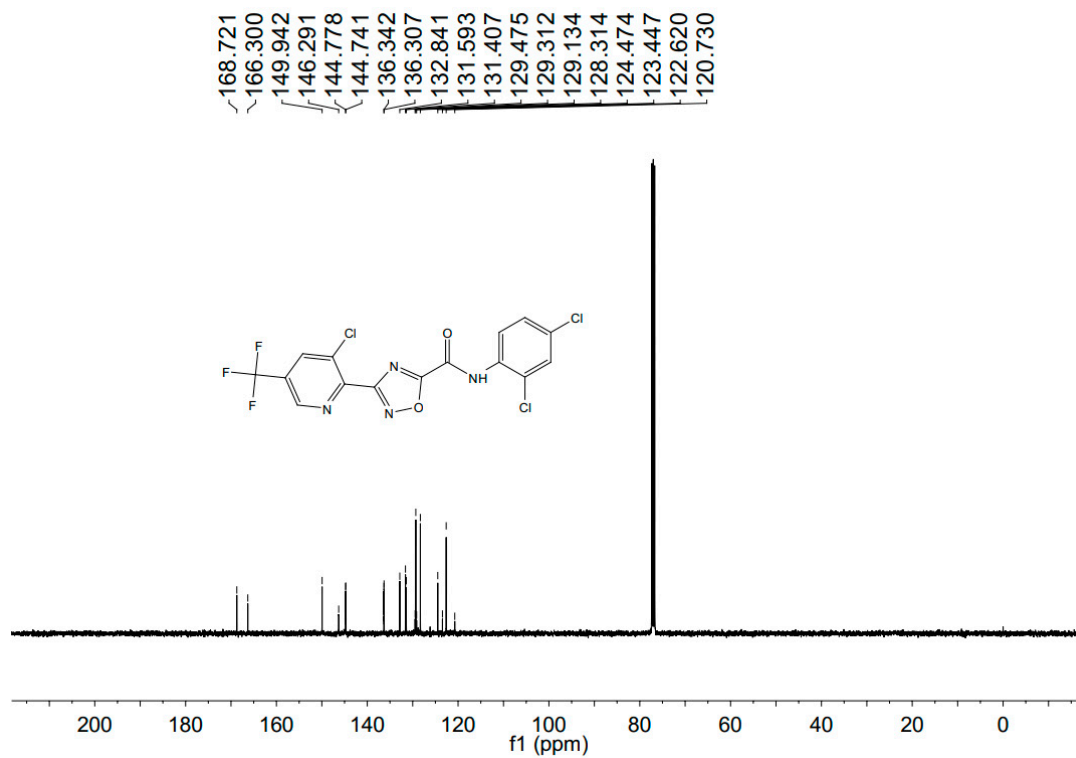

**$^{13}\text{C}$  NMR of compound F24**

F24 #28 RT: 0.12 AV: 1 NL: 1.61E9  
T: FTMS + p ESI Full ms [100.0000-1500.0000]

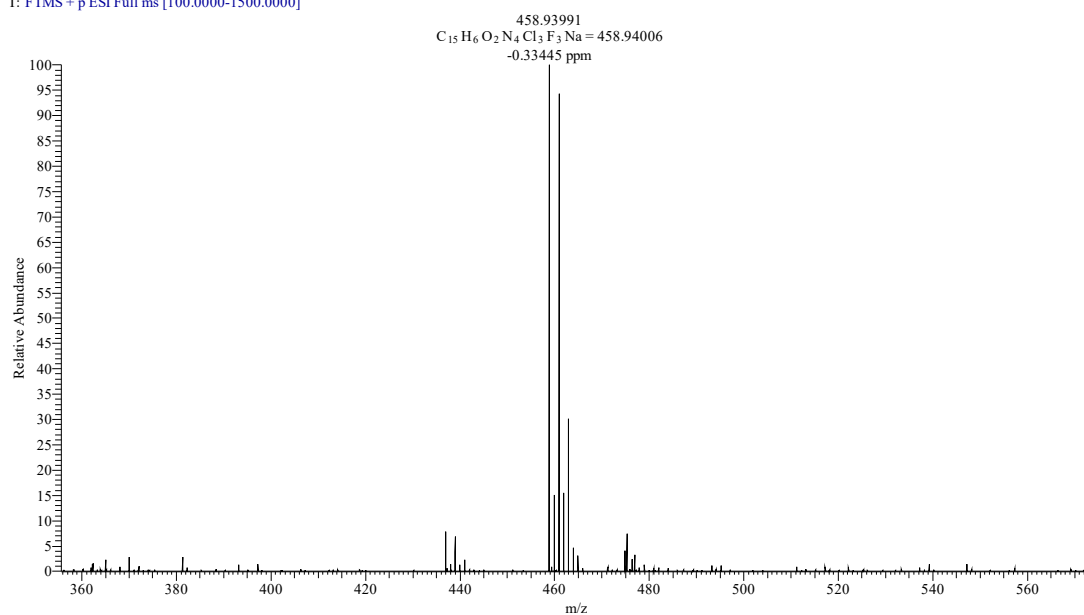**HRMS of compound F24**
